# Supplementary material for: Genotypic Clustering of H5N1 Avian Influenza Viruses Detected in North America
Source: Preprints.org preprint supplement (doi:10.20944/preprints202410.2401.v1), 2024-10-31
Supplement: Supplementary file 1 [file supplementary]

## Sheet: Sheet1
Supplemetary Table S1. Genotypic assignment of each virus detected in North America with description of collection date, host species, and bird .
Source	Submission ID	Country	State	Flyway	Collection date	Host	Host type	Cluster	Genotype
USDA	22-006976-009	USA	Massachusetts	Atlantic	2022-02-28	Great horned owl	Non-host wild bird	Cluster 3	A1
USDA	22-008377-004	USA	Illinois	Mississippi	2022-03-14	Goose	Waterfowl	Cluster 3	A1
USDA	22-008719-004	USA	Iowa	Mississippi	2022-03-22	Snow goose	Waterfowl	Cluster 4	B3.1
USDA	22-008834-002	USA	New York	Atlantic	2022-03-21	Merganser	Waterfowl	Cluster 6	B1.1
USDA	22-008834-003	USA	New York	Atlantic	2022-03-21	Merganser	Waterfowl	Cluster 6	B1.1
USDA	22-008834-004	USA	New York	Atlantic	2022-03-21	Merganser	Waterfowl	Cluster 6	B1.1
USDA	22-008951-001	USA	Massachusetts	Atlantic	2022-03-07	Sanderling	Sea/shore bird	Cluster 3	A2
USDA	22-008951-003	USA	Massachusetts	Atlantic	2022-03-07	Herring Gull	Sea/shore bird	Cluster 3	A2
USDA	22-008951-006	USA	Massachusetts	Atlantic	2022-03-07	American crow	Non-host wild bird	Cluster 3	A2
USDA	22-008951-007	USA	Massachusetts	Atlantic	2022-03-07	American crow	Non-host wild bird	Cluster 3	A2
USDA	22-008951-008	USA	Massachusetts	Atlantic	2022-03-07	American crow	Non-host wild bird	Cluster 3	A2
USDA	22-008951-010	USA	Massachusetts	Atlantic	2022-03-07	American crow	Non-host wild bird	Cluster 3	A2
USDA	22-009058-002	USA	Florida	Atlantic	2022-03-21	Black Vulture	Non-host wild bird	Cluster 6	B1.1
USDA	22-009940-002	USA	Florida	Atlantic	2022-03-30	Mallard	Waterfowl	Cluster 6	B1.1
USDA	22-009941-002	USA	Florida	Atlantic	2022-03-30	Black Vulture	Non-host wild bird	Cluster 6	B1.1
USDA	22-010305-002	USA	Minnesota	Mississippi	2022-03-28	Snow goose	Waterfowl	Cluster 4	B2.2
USDA	22-010671-002	USA	Massachusetts	Atlantic	2022-03-17	Sanderling	Sea/shore bird	Cluster 3	A2
USDA	22-010671-003	USA	Massachusetts	Atlantic	2022-03-17	Red-tailed hawk	Non-host wild bird	Cluster 3	A2
USDA	22-010671-006	USA	Massachusetts	Atlantic	2022-03-17	American crow	Non-host wild bird	Cluster 3	A2
USDA	22-010713-003	USA	Minnesota	Mississippi	2022-04-06	Great horned owl	Non-host wild bird	Cluster 2	B2.1
USDA	22-010922-002	USA	Indiana	Mississippi	2022-04-08	Bald eagle	Non-host wild bird	Cluster 5	B1.2
USDA	22-011040-003	USA	North Dakota	Central	2022-04-05	Snow goose	Waterfowl	Cluster 1	B3.2
USDA	22-011101-006	USA	Iowa	Mississippi	2022-04-12	Pelican	Sea/shore bird	Cluster 3	A1
USDA	22-011101-008	USA	Iowa	Mississippi	2022-04-12	Pelican	Sea/shore bird	Cluster 3	A1
USDA	22-011101-009	USA	Iowa	Mississippi	2022-04-12	Pelican	Sea/shore bird	Cluster 3	A1
USDA	22-011426-002	USA	Wyoming	Central	Unknown	Wild Turkey	Non-host wild bird	Cluster 2	B2.1
USDA	22-011426-004	USA	Wyoming	Central	Unknown	Wild Turkey	Non-host wild bird	Cluster 2	B2.1
USDA	22-011426-008	USA	Wyoming	Central	Unknown	Wild Turkey	Non-host wild bird	Cluster 2	B2.1
USDA	22-011808-003	USA	Florida	Atlantic	2022-04-13	Muscovy Duck	Waterfowl	Cluster 6	B1.1
USDA	22-011871-007	USA	Minnesota	Mississippi	2022-04-15	Bald eagle	Non-host wild bird	Cluster 4	B3.1
USDA	22-012056-007	USA	Michigan	Mississippi	2022-04-14	Great horned owl	Non-host wild bird	Cluster 3	A1
USDA	22-012338-011	USA	Missouri	Mississippi	U/1/2022	Pelican	Sea/shore bird	Cluster 3	A1
USDA	22-012380-002	USA	Washington	Pacific	2022-04-19	Snow goose	Waterfowl	Cluster 4	B4.1
USDA	22-012381-001	USA	North Dakota	Central	2022-04-18	Red-tailed hawk	Non-host wild bird	Cluster 4	B3.1
USDA	22-012382-001	USA	North Dakota	Central	2022-04-18	Red-tailed hawk	Non-host wild bird	Cluster 2	B2.1
USDA	22-012383-001	USA	Wisconsin	Mississippi	2022-04-15	Canada goose	Waterfowl	Cluster 5	B1.2
USDA	22-012387-001	USA	Wisconsin	Mississippi	2022-04-11	Wood Duck	Waterfowl	Cluster 2	B2.1
USDA	22-012388-001	USA	Wisconsin	Mississippi	2022-04-11	Hooded Merganser	Waterfowl	Cluster 6	B1.1
USDA	22-012391-001	USA	Wisconsin	Mississippi	2022-04-12	Wood Duck	Waterfowl	Cluster 2	B2.1
USDA	22-012392-001	USA	Wisconsin	Mississippi	2022-04-12	Turkey Vulture	Non-host wild bird	Cluster 2	B2.1
USDA	22-012393-001	USA	Colorado	Central	2022-04-20	Eagle	Non-host wild bird	Cluster 4	B2.2
USDA	22-012395-001	USA	North Dakota	Central	2022-04-20	Snow goose	Waterfowl	Cluster 2	B2.1
USDA	22-012396-001	USA	Wisconsin	Mississippi	2022-04-14	American white Pelican	Sea/shore bird	Cluster 5	B1.2
USDA	22-012628-002	USA	Florida	Atlantic	2022-04-20	Black Vulture	Non-host wild bird	Cluster 6	B1.1
USDA	22-012668-012	USA	Minnesota	Mississippi	2022-04-25	Great horned owl	Non-host wild bird	Cluster 2	B2.1
USDA	22-012708-001	USA	Wyoming	Central	2022-04-19	Red-tailed hawk	Non-host wild bird	Cluster 4	B4.1
USDA	22-012777-001	USA	Minnesota	Mississippi	2022-04-21	Red-tailed hawk	Non-host wild bird	Cluster 2	B2.1
USDA	22-012777-002	USA	Minnesota	Mississippi	2022-04-21	Red-tailed hawk	Non-host wild bird	Cluster 4	B3.1
USDA	22-012784-001	USA	Virginia	Atlantic	2022-04-22	Bald eagle	Non-host wild bird	Cluster 6	B1.1
USDA	22-012931-008	USA	Minnesota	Mississippi	2022-04-22	Great horned owl	Non-host wild bird	Cluster 2	B2.1
USDA	22-013128-005	USA	Minnesota	Mississippi	2022-04-27	Great horned owl	Non-host wild bird	Cluster 2	B2.1
USDA	22-013257-001	USA	Iowa	Mississippi	2022-04-28	Turkey Vulture	Non-host wild bird	Cluster 2	B2.1
USDA	22-013257-002	USA	Iowa	Mississippi	2022-04-28	Great horned owl	Non-host wild bird	Cluster 2	B2.1
USDA	22-013261-002	USA	Minnesota	Mississippi	2022-04-28	Barred owl	Non-host wild bird	Cluster 2	B2.1
USDA	22-013261-003	USA	Minnesota	Mississippi	2022-04-28	Red-tailed hawk	Non-host wild bird	Cluster 1	B3.2
USDA	22-013261-004	USA	Minnesota	Mississippi	2022-04-28	Turkey Vulture	Non-host wild bird	Cluster 1	B3.2
USDA	22-013261-005	USA	Minnesota	Mississippi	2022-04-28	Great horned owl	Non-host wild bird	Cluster 1	B3.2
USDA	22-013262-001	USA	Wisconsin	Mississippi	2022-04-28	Bald eagle	Non-host wild bird	Cluster 3	A1
USDA	22-013262-002	USA	Wisconsin	Mississippi	2022-04-28	Red-tailed hawk	Non-host wild bird	Cluster 1	B3.2
USDA	22-013264-001	USA	Wyoming	Central	2022-04-21	Great horned owl	Non-host wild bird	Cluster 2	B2.1
USDA	22-013265-001	USA	North Dakota	Central	2022-04-25	Turkey Vulture	Non-host wild bird	Cluster 2	B2.1
USDA	22-013265-002	USA	North Dakota	Central	2022-04-25	Turkey Vulture	Non-host wild bird	Cluster 1	B3.2
USDA	22-013267-001	USA	Wisconsin	Mississippi	2022-04-13	Merganser	Waterfowl	Cluster 2	B2.1
USDA	22-013269-001	USA	Wisconsin	Mississippi	2022-04-11	Wood Duck	Waterfowl	Cluster 3	A1
USDA	22-013272-001	USA	Wisconsin	Mississippi	2022-04-17	Great horned owl	Non-host wild bird	Cluster 2	B2.1
USDA	22-013273-001	USA	Wisconsin	Mississippi	2022-04-20	Herring Gull	Sea/shore bird	Cluster 6	B1.1
USDA	22-013275-001	USA	Wisconsin	Mississippi	2022-04-21	Wood Duck	Waterfowl	Cluster 6	B1.1
USDA	22-013276-001	USA	Wisconsin	Mississippi	2022-04-22	Turkey Vulture	Non-host wild bird	Cluster 2	B2.1
USDA	22-013277-001	USA	Ohio	Mississippi	2022-04-21	Peregrine falcon	Non-host wild bird	Cluster 6	B1.1
USDA	22-013277-002	USA	Ohio	Mississippi	2022-04-21	Peregrine falcon	Non-host wild bird	Cluster 6	B1.1
USDA	22-013278-001	USA	Wisconsin	Mississippi	2022-04-21	Wood Duck	Waterfowl	Cluster 2	B2.1
USDA	22-013279-001	USA	Colorado	Central	2022-04-27	Turkey Vulture	Non-host wild bird	Cluster 4	B2.2
USDA	22-013279-002	USA	Colorado	Central	2022-04-27	Canada goose	Waterfowl	Cluster 2	B2.1
USDA	22-013321-001	USA	Vermont	Atlantic	2022-04-26	Canada goose	Waterfowl	Cluster 5	B1.2
USDA	22-013321-002	USA	Vermont	Atlantic	2022-04-25	Red-tailed hawk	Non-host wild bird	Cluster 5	B1.2
USDA	22-013321-003	USA	Vermont	Atlantic	2022-04-26	Bald eagle	Non-host wild bird	Cluster 5	B1.2
USDA	22-013321-004	USA	Vermont	Atlantic	2022-04-25	Canada goose	Waterfowl	Cluster 4	Minor08
USDA	22-013369-001	USA	Montana	Pacific	2022-04-28	Goose	Waterfowl	Cluster 4	B4.1
USDA	22-013369-006	USA	Montana	Pacific	2022-04-28	Canada goose	Waterfowl	Cluster 4	B4.1
USDA	22-013369-007	USA	Montana	Pacific	2022-04-28	Owl	Non-host wild bird	Cluster 4	B4.1
USDA	22-013369-008	USA	Montana	Pacific	2022-04-28	Owl	Non-host wild bird	Cluster 4	B4.1
USDA	22-013369-009	USA	Montana	Pacific	2022-04-28	Owl	Non-host wild bird	Cluster 4	B4.1
USDA	22-013380-001	USA	Connecticut	Atlantic	2022-04-28	Great horned owl	Non-host wild bird	Cluster 3	A2
USDA	22-013394-001	USA	Minnesota	Mississippi	2022-04-28	Great horned owl	Non-host wild bird	Cluster 4	B3.1
USDA	22-013394-002	USA	Minnesota	Mississippi	2022-04-28	Wood Duck	Waterfowl	Cluster 2	B2.1
USDA	22-013395-002	USA	Minnesota	Mississippi	2022-04-28	Great horned owl	Non-host wild bird	Cluster 1	B3.2
USDA	22-013395-003	USA	Minnesota	Mississippi	2022-04-25	Red-tailed hawk	Non-host wild bird	Cluster 2	B2.1
USDA	22-013395-004	USA	Minnesota	Mississippi	2022-04-29	Great horned owl	Non-host wild bird	Cluster 2	B2.1
USDA	22-013395-005	USA	Minnesota	Mississippi	2022-04-29	Barred owl	Non-host wild bird	Cluster 1	B3.2
USDA	22-013395-007	USA	Minnesota	Mississippi	2022-04-29	Great horned owl	Non-host wild bird	Cluster 1	B3.2
USDA	22-013395-008	USA	Minnesota	Mississippi	2022-04-28	Great horned owl	Non-host wild bird	Cluster 1	B3.2
USDA	22-013395-009	USA	Minnesota	Mississippi	2022-04-28	Great horned owl	Non-host wild bird	Cluster 1	B3.2
USDA	22-013395-010	USA	Minnesota	Mississippi	2022-04-28	Great horned owl	Non-host wild bird	Cluster 2	B2.1
USDA	22-013395-011	USA	Minnesota	Mississippi	2022-04-28	Red-tailed hawk	Non-host wild bird	Cluster 6	B1.1
USDA	22-013395-013	USA	Minnesota	Mississippi	2022-04-28	Red-tailed hawk	Non-host wild bird	Cluster 2	B2.1
USDA	22-013396-001	USA	Minnesota	Mississippi	2022-04-28	Common loon	Waterfowl	Cluster 2	B2.1
USDA	22-013397-001	USA	Minnesota	Mississippi	2022-04-28	Wood Duck	Waterfowl	Cluster 2	B2.1
USDA	22-013397-002	USA	Minnesota	Mississippi	2022-04-29	Wood Duck	Waterfowl	Cluster 1	B3.2
USDA	22-013420-001	USA	North Dakota	Central	2022-04-27	Turkey Vulture	Non-host wild bird	Cluster 4	B3.1
USDA	22-013421-001	USA	North Dakota	Central	2022-04-28	Snow goose	Waterfowl	Cluster 1	B3.2
USDA	22-013421-002	USA	North Dakota	Central	2022-04-28	Snow goose	Waterfowl	Cluster 4	B3.1
USDA	22-013422-001	USA	North Dakota	Central	2022-04-28	Ross's goose	Waterfowl	Cluster 2	B2.1
USDA	22-013422-002	USA	North Dakota	Central	2022-04-28	Ross's goose	Waterfowl	Cluster 4	B3.1
USDA	22-013422-003	USA	North Dakota	Central	2022-04-28	Ross's goose	Waterfowl	Cluster 1	B3.2
USDA	22-013422-004	USA	North Dakota	Central	2022-04-28	Snow goose	Waterfowl	Cluster 2	B2.1
USDA	22-013422-005	USA	North Dakota	Central	2022-04-28	Snow goose	Waterfowl	Cluster 2	B2.1
USDA	22-013422-006	USA	North Dakota	Central	2022-04-28	Snow goose	Waterfowl	Cluster 2	B2.1
USDA	22-013422-007	USA	North Dakota	Central	2022-04-28	Snow goose	Waterfowl	Cluster 2	B2.1
USDA	22-013424-001	USA	Wisconsin	Mississippi	2022-04-27	Herring Gull	Sea/shore bird	Cluster 6	B1.1
USDA	22-013424-002	USA	Wisconsin	Mississippi	2022-04-27	Herring Gull	Sea/shore bird	Cluster 6	B1.1
USDA	22-013424-003	USA	Wisconsin	Mississippi	2022-04-27	Herring Gull	Sea/shore bird	Cluster 6	B1.1
USDA	22-013425-001	USA	Minnesota	Mississippi	2022-04-26	Canada goose	Waterfowl	Cluster 2	B2.1
USDA	22-013425-002	USA	Minnesota	Mississippi	2022-04-26	Canada goose	Waterfowl	Cluster 2	B2.1
USDA	22-013425-003	USA	Minnesota	Mississippi	2022-04-26	Canada goose	Waterfowl	Cluster 2	B2.1
USDA	22-013426-001	USA	Minnesota	Mississippi	2022-04-26	Hooded Merganser	Waterfowl	Cluster 2	B2.1
USDA	22-013428-001	USA	Minnesota	Mississippi	2022-04-26	Bald eagle	Non-host wild bird	Cluster 4	B3.1
USDA	22-013430-001	USA	North Dakota	Central	2022-04-27	Bald eagle	Non-host wild bird	Cluster 2	B2.1
USDA	22-013431-001	USA	Illinois	Mississippi	2022-04-26	Red-tailed hawk	Non-host wild bird	Cluster 2	B2.1
USDA	22-013432-001	USA	Illinois	Mississippi	2022-04-26	Mallard	Waterfowl	Cluster 2	B2.1
USDA	22-013433-001	USA	Minnesota	Mississippi	2022-04-28	Turkey Vulture	Non-host wild bird	Cluster 2	B2.1
USDA	22-013434-001	USA	Minnesota	Mississippi	2022-04-27	Red-tailed hawk	Non-host wild bird	Cluster 2	B2.1
USDA	22-013435-001	USA	Minnesota	Mississippi	2022-04-27	Hooded Merganser	Waterfowl	Cluster 3	A1
USDA	22-013436-001	USA	Illinois	Mississippi	2022-04-25	American white Pelican	Sea/shore bird	Cluster 1	B3.2
USDA	22-013437-001	USA	Minnesota	Mississippi	2022-04-25	Bald eagle	Non-host wild bird	Cluster 2	B2.1
USDA	22-013438-001	USA	Minnesota	Mississippi	2022-04-28	Bald eagle	Non-host wild bird	Cluster 5	B1.2
USDA	22-013462-001	USA	New York	Atlantic	2022-04-28	Turkey Vulture	Non-host wild bird	Cluster 6	B1.1
USDA	22-013462-002	USA	New York	Atlantic	2022-04-28	Turkey Vulture	Non-host wild bird	Cluster 6	B1.1
USDA	22-013487-001	USA	Florida	Atlantic	2022-04-27	Black Vulture	Non-host wild bird	Cluster 6	B1.1
USDA	22-013488-001	USA	Florida	Atlantic	2022-04-27	Black Vulture	Non-host wild bird	Cluster 6	B1.1
USDA	22-013489-001	USA	Florida	Atlantic	2022-04-27	Black Vulture	Non-host wild bird	Cluster 6	B1.1
USDA	22-013490-001	USA	Florida	Atlantic	2022-04-26	Black Vulture	Non-host wild bird	Cluster 6	B1.1
USDA	22-013490-002	USA	Florida	Atlantic	2022-04-26	Black Vulture	Non-host wild bird	Cluster 6	B1.1
USDA	22-013492-001	USA	Florida	Atlantic	2022-04-25	Black Vulture	Non-host wild bird	Cluster 6	B1.1
USDA	22-013492-002	USA	Florida	Atlantic	2022-04-25	Black Vulture	Non-host wild bird	Cluster 6	B1.1
USDA	22-013493-001	USA	Florida	Atlantic	2022-04-26	Duck	Domestic waterfowl	Cluster 6	B1.1
USDA	22-013493-002	USA	Florida	Atlantic	2022-04-25	Great horned owl	Non-host wild bird	Cluster 6	B1.1
USDA	22-013493-003	USA	Florida	Atlantic	2022-04-26	Bald eagle	Non-host wild bird	Cluster 3	A1
USDA	22-013517-001	USA	Minnesota	Mississippi	2022-04-27	Bald eagle	Non-host wild bird	Cluster 6	B1.1
USDA	22-013517-002	USA	Minnesota	Mississippi	2022-04-27	Bald eagle	Non-host wild bird	Cluster 5	B1.2
USDA	22-013517-003	USA	Minnesota	Mississippi	2022-04-25	Bald eagle	Non-host wild bird	Cluster 5	B1.2
USDA	22-013517-007	USA	Minnesota	Mississippi	2022-04-28	Herring Gull	Sea/shore bird	Cluster 6	B1.1
USDA	22-013517-010	USA	Minnesota	Mississippi	2022-04-28	Red-shouldered hawk	Non-host wild bird	Cluster 3	A1
USDA	22-013517-011	USA	Minnesota	Mississippi	2022-04-28	Red-tailed hawk	Non-host wild bird	Cluster 5	B1.2
USDA	22-013518-001	USA	Nebraska	Central	2022-04-28	Peregrine falcon	Non-host wild bird	Cluster 1	B3.2
USDA	22-013532-001	USA	Wyoming	Central	2022-04-28	Great horned owl	Non-host wild bird	Cluster 2	B2.1
USDA	22-013533-001	USA	Wyoming	Central	2022-04-28	Red-tailed hawk	Non-host wild bird	Cluster 2	B2.1
USDA	22-013534-001	USA	Wyoming	Central	2022-04-27	Great horned owl	Non-host wild bird	Cluster 2	B2.1
USDA	22-013544-001	USA	Wisconsin	Mississippi	2022-04-26	Bald eagle	Non-host wild bird	Cluster 4	B3.1
USDA	22-013558-001	USA	Iowa	Mississippi	2022-05-01	Bald eagle	Non-host wild bird	Cluster 2	B2.1
USDA	22-013610-001	USA	Utah	Pacific	Unknown	Great horned owl	Non-host wild bird	Cluster 4	B4.1
USDA	22-013642-001	USA	Wisconsin	Mississippi	2022-04-21	American white Pelican	Sea/shore bird	Cluster 5	B1.2
USDA	22-013642-002	USA	Wisconsin	Mississippi	2022-04-21	American white Pelican	Sea/shore bird	Cluster 6	B1.1
USDA	22-013643-001	USA	Idaho	Pacific	2022-04-18	Great horned owl	Non-host wild bird	Cluster 2	B2.1
USDA	22-013651-001	USA	Nebraska	Central	2022-05-02	Turkey Vulture	Non-host wild bird	Cluster 2	B2.1
USDA	22-013662-001	USA	Michigan	Mississippi	2022-04-29	Red-tailed hawk	Non-host wild bird	Cluster 2	B2.1
USDA	22-013662-003	USA	Michigan	Mississippi	2022-04-29	Bald eagle	Non-host wild bird	Cluster 2	B2.1
USDA	22-013663-002	USA	Minnesota	Mississippi	2022-05-03	Great horned owl	Non-host wild bird	Cluster 3	A1
USDA	22-013663-004	USA	Minnesota	Mississippi	2022-05-03	Red-tailed hawk	Non-host wild bird	Cluster 1	B3.2
USDA	22-013663-005	USA	Minnesota	Mississippi	2022-05-03	Great horned owl	Non-host wild bird	Cluster 2	B2.1
USDA	22-013663-006	USA	Minnesota	Mississippi	2022-05-03	Great horned owl	Non-host wild bird	Cluster 1	B3.2
USDA	22-013663-007	USA	Minnesota	Mississippi	2022-05-03	Bald eagle	Non-host wild bird	Cluster 2	B2.1
USDA	22-013666-001	USA	Minnesota	Mississippi	2022-04-29	Great horned owl	Non-host wild bird	Cluster 2	B2.1
USDA	22-013667-001	USA	Minnesota	Mississippi	2022-04-29	Red-tailed hawk	Non-host wild bird	Cluster 1	B3.2
USDA	22-013669-001	USA	Minnesota	Mississippi	2022-04-29	Red-tailed hawk	Non-host wild bird	Cluster 2	B2.1
USDA	22-013672-001	USA	Minnesota	Mississippi	2022-04-29	Bald eagle	Non-host wild bird	Cluster 2	B2.1
USDA	22-013673-001	USA	Minnesota	Mississippi	2022-04-29	Common loon	Waterfowl	Cluster 1	B3.2
USDA	22-013751-001	USA	Minnesota	Mississippi	2022-05-03	Great horned owl	Non-host wild bird	Cluster 2	B2.1
USDA	22-013751-002	USA	Minnesota	Mississippi	2022-05-03	Great horned owl	Non-host wild bird	Cluster 1	B3.2
USDA	22-013751-003	USA	Minnesota	Mississippi	2022-05-03	Great horned owl	Non-host wild bird	Cluster 5	B1.2
USDA	22-013751-004	USA	Minnesota	Mississippi	2022-05-03	Hawk	Non-host wild bird	Cluster 2	B2.1
USDA	22-013751-005	USA	Minnesota	Mississippi	2022-05-03	Red-shouldered hawk	Non-host wild bird	Cluster 2	B2.1
USDA	22-013770-001	USA	Colorado	Central	2022-04-30	Red-tailed hawk	Non-host wild bird	Cluster 2	B2.1
USDA	22-013814-001	USA	Wyoming	Central	2022-05-02	Great horned owl	Non-host wild bird	Cluster 3	A1
USDA	22-013814-002	USA	Wyoming	Central	2022-05-02	Great horned owl	Non-host wild bird	Cluster 3	A1
USDA	22-013870-001	USA	New York	Atlantic	Unknown	Great horned owl	Non-host wild bird	Cluster 5	B1.2
USDA	22-013871-001	USA	New York	Atlantic	U/1/2022	Ring-necked pheasant	Poultry	Cluster 3	A1
USDA	22-013872-001	USA	New York	Atlantic	Unknown	Red-tailed hawk	Non-host wild bird	Cluster 5	B1.2
USDA	22-013873-001	USA	New York	Atlantic	U/1/2022	Ring-necked pheasant	Poultry	Cluster 3	A1
USDA	22-013874-001	USA	New York	Atlantic	Unknown	Red-tailed hawk	Non-host wild bird	Cluster 4	Minor08
USDA	22-013875-001	USA	New York	Atlantic	Unknown	Bald eagle	Non-host wild bird	Cluster 5	B1.2
USDA	22-013929-001	USA	South Dakota	Central	Unknown	Red-tailed hawk	Non-host wild bird	Cluster 2	B2.1
USDA	22-013941-002	USA	Montana	Pacific	2022-05-02	Owl	Non-host wild bird	Cluster 4	B4.1
USDA	22-013957-002	USA	Michigan	Mississippi	2022-05-02	Bald eagle	Non-host wild bird	Cluster 6	B1.1
USDA	22-013957-003	USA	Michigan	Mississippi	2022-05-02	Hawk	Non-host wild bird	Cluster 2	B2.1
USDA	22-013959-001	USA	Montana	Pacific	2022-05-02	Eagle	Non-host wild bird	Cluster 2	B2.1
USDA	22-013984-002	USA	Illinois	Mississippi	2022-05-02	Turkey Vulture	Non-host wild bird	Cluster 6	B1.1
USDA	22-014003-002	USA	Wyoming	Central	2022-05-01	Great horned owl	Non-host wild bird	Cluster 2	B2.1
USDA	22-014004-002	USA	Wyoming	Central	2022-04-28	Great horned owl	Non-host wild bird	Cluster 4	B4.1
USDA	22-014006-001	USA	Wyoming	Central	2022-05-01	Great horned owl	Non-host wild bird	Cluster 2	B2.1
USDA	22-014006-002	USA	Wyoming	Central	2022-05-01	Great horned owl	Non-host wild bird	Cluster 2	B2.1
USDA	22-014024-001	USA	Washington	Pacific	2022-05-03	Sandhill crane	Non-host wild bird	Cluster 4	B4.1
USDA	22-014025-001	USA	Washington	Pacific	2022-05-04	Canada goose	Waterfowl	Cluster 4	B4.1
USDA	22-014026-001	USA	Florida	Atlantic	2022-05-02	Black Vulture	Non-host wild bird	Cluster 6	B1.1
USDA	22-014028-001	USA	Illinois	Mississippi	2022-04-28	Bald eagle	Non-host wild bird	Cluster 5	B1.2
USDA	22-014030-001	USA	North Dakota	Central	2022-05-02	Great horned owl	Non-host wild bird	Cluster 1	B3.2
USDA	22-014031-001	USA	North Dakota	Central	2022-05-02	Great horned owl	Non-host wild bird	Cluster 2	B2.1
USDA	22-014031-002	USA	North Dakota	Central	2022-05-02	Northern harrier	Non-host wild bird	Cluster 2	B2.1
USDA	22-014034-001	USA	Florida	Atlantic	2022-05-02	Black Vulture	Non-host wild bird	Cluster 6	B1.1
USDA	22-014034-002	USA	Florida	Atlantic	2022-05-02	Black Vulture	Non-host wild bird	Cluster 6	B1.1
USDA	22-014035-001	USA	Florida	Atlantic	2022-05-03	Black Vulture	Non-host wild bird	Cluster 6	B1.1
USDA	22-014036-001	USA	Florida	Atlantic	2022-04-30	Black Vulture	Non-host wild bird	Cluster 6	B1.1
USDA	22-014037-001	USA	Minnesota	Mississippi	2022-05-04	Great horned owl	Non-host wild bird	Cluster 2	B2.1
USDA	22-014037-002	USA	Minnesota	Mississippi	2022-05-04	Red-shouldered hawk	Non-host wild bird	Cluster 2	B2.1
USDA	22-014037-004	USA	Minnesota	Mississippi	2022-05-04	Red-tailed hawk	Non-host wild bird	Cluster 1	B3.2
USDA	22-014148-001	USA	Utah	Pacific	2022-05-05	Owl	Non-host wild bird	Cluster 2	B2.1
USDA	22-014183-003	USA	Minnesota	Mississippi	2022-05-05	Great horned owl	Non-host wild bird	Cluster 1	B3.2
USDA	22-014183-004	USA	Minnesota	Mississippi	2022-05-05	Red-tailed hawk	Non-host wild bird	Cluster 1	B3.2
USDA	22-014232-001	USA	Minnesota	Mississippi	2022-04-28	Cooper's Hawk	Non-host wild bird	Cluster 2	B2.1
USDA	22-014253-001	USA	South Dakota	Central	2022-05-05	Bald eagle	Non-host wild bird	Cluster 2	B2.1
USDA	22-014260-001	USA	Indiana	Mississippi	2022-04-28	Great horned owl	Non-host wild bird	Cluster 4	B2.2
USDA	22-014308-002	USA	Florida	Atlantic	2022-05-02	Black Vulture	Non-host wild bird	Cluster 6	B1.1
USDA	22-014308-003	USA	Florida	Atlantic	2022-05-02	Black Vulture	Non-host wild bird	Cluster 6	B1.1
USDA	22-014308-004	USA	Florida	Atlantic	2022-05-02	Black Vulture	Non-host wild bird	Cluster 6	B1.1
USDA	22-014308-005	USA	Florida	Atlantic	2022-05-02	Black Vulture	Non-host wild bird	Cluster 6	B1.1
USDA	22-014308-006	USA	Florida	Atlantic	2022-05-02	Black Vulture	Non-host wild bird	Cluster 6	B1.1
USDA	22-014333-001	USA	Minnesota	Mississippi	2022-05-09	Wood Duck	Waterfowl	Cluster 1	B3.2
USDA	22-014336-002	USA	Minnesota	Mississippi	2022-05-09	Red-tailed hawk	Non-host wild bird	Cluster 2	B2.1
USDA	22-014336-003	USA	Minnesota	Mississippi	2022-05-09	Great horned owl	Non-host wild bird	Cluster 2	B2.1
USDA	22-014336-004	USA	Minnesota	Mississippi	2022-05-09	Great horned owl	Non-host wild bird	Cluster 1	B3.2
USDA	22-014336-007	USA	Minnesota	Mississippi	2022-05-09	Great horned owl	Non-host wild bird	Cluster 2	B2.1
USDA	22-014336-008	USA	Minnesota	Mississippi	2022-05-09	Great horned owl	Non-host wild bird	Cluster 2	B2.1
USDA	22-014336-009	USA	Minnesota	Mississippi	2022-05-09	Broad-winged Hawk	Non-host wild bird	Cluster 1	B3.2
USDA	22-014336-010	USA	Minnesota	Mississippi	2022-05-09	Great horned owl	Non-host wild bird	Cluster 2	B2.1
USDA	22-014336-012	USA	Minnesota	Mississippi	2022-05-09	Great horned owl	Non-host wild bird	Cluster 2	B2.1
USDA	22-014336-013	USA	Minnesota	Mississippi	2022-05-09	Great horned owl	Non-host wild bird	Cluster 2	B2.1
USDA	22-014336-015	USA	Minnesota	Mississippi	2022-05-09	Great horned owl	Non-host wild bird	Cluster 1	B3.2
USDA	22-014352-001	USA	Wisconsin	Mississippi	2022-04-21	American crow	Non-host wild bird	Cluster 1	B3.2
USDA	22-014353-001	USA	Wisconsin	Mississippi	2022-04-21	Great horned owl	Non-host wild bird	Cluster 2	B2.1
USDA	22-014354-001	USA	Wisconsin	Mississippi	2022-04-21	Turkey Vulture	Non-host wild bird	Cluster 1	B3.2
USDA	22-014356-001	USA	Wisconsin	Mississippi	2022-04-21	Great horned owl	Non-host wild bird	Cluster 2	B2.1
USDA	22-014359-001	USA	Wisconsin	Mississippi	2022-04-22	Great horned owl	Non-host wild bird	Cluster 5	B1.2
USDA	22-014359-002	USA	Wisconsin	Mississippi	2022-04-22	Great horned owl	Non-host wild bird	Cluster 5	B1.2
USDA	22-014359-003	USA	Wisconsin	Mississippi	2022-04-22	Great horned owl	Non-host wild bird	Cluster 5	B1.2
USDA	22-014360-001	USA	Wisconsin	Mississippi	2022-04-22	Herring Gull	Sea/shore bird	Cluster 6	B1.1
USDA	22-014361-001	USA	Wisconsin	Mississippi	2022-04-21	Herring Gull	Sea/shore bird	Cluster 5	B1.2
USDA	22-014362-001	USA	Wisconsin	Mississippi	2022-04-10	Canada goose	Waterfowl	Cluster 1	B3.2
USDA	22-014363-001	USA	Wisconsin	Mississippi	2022-04-22	Bald eagle	Non-host wild bird	Cluster 2	B2.1
USDA	22-014365-001	USA	Wisconsin	Mississippi	2022-04-22	Wood Duck	Waterfowl	Cluster 1	B3.2
USDA	22-014366-001	USA	Wisconsin	Mississippi	2022-04-22	Wood Duck	Waterfowl	Cluster 1	B3.2
USDA	22-014367-001	USA	Wisconsin	Mississippi	2022-04-14	Wood Duck	Waterfowl	Cluster 1	B3.2
USDA	22-014369-001	USA	Wisconsin	Mississippi	2022-04-25	American crow	Non-host wild bird	Cluster 1	B3.2
USDA	22-014371-001	USA	Wisconsin	Mississippi	2022-04-24	Great horned owl	Non-host wild bird	Cluster 5	B1.2
USDA	22-014373-001	USA	Wisconsin	Mississippi	2022-04-24	Bald eagle	Non-host wild bird	Cluster 5	B1.2
USDA	22-014374-001	USA	Wisconsin	Mississippi	2022-04-19	Wood Duck	Waterfowl	Cluster 2	B2.1
USDA	22-014377-001	USA	Wisconsin	Mississippi	2022-04-28	Red-tailed hawk	Non-host wild bird	Cluster 2	B2.1
USDA	22-014378-001	USA	Wisconsin	Mississippi	2022-04-28	Great horned owl	Non-host wild bird	Cluster 6	B1.1
USDA	22-014378-002	USA	Wisconsin	Mississippi	2022-04-28	Great horned owl	Non-host wild bird	Cluster 6	B1.1
USDA	22-014379-001	USA	Wisconsin	Mississippi	2022-04-27	Bald eagle	Non-host wild bird	Cluster 6	B1.1
USDA	22-014393-001	USA	Wisconsin	Mississippi	2022-04-27	Red-tailed hawk	Non-host wild bird	Cluster 6	B1.1
USDA	22-014394-001	USA	Wisconsin	Mississippi	2022-04-26	Wood Duck	Waterfowl	Cluster 2	B2.1
USDA	22-014401-002	USA	Idaho	Pacific	2022-04-15	Canada goose	Waterfowl	Cluster 2	B2.1
USDA	22-014402-001	USA	Idaho	Pacific	2022-04-10	American white Pelican	Sea/shore bird	Cluster 4	B4.1
USDA	22-014402-002	USA	Idaho	Pacific	2022-04-10	American white Pelican	Sea/shore bird	Cluster 2	B2.1
USDA	22-014404-001	USA	Minnesota	Mississippi	2022-05-01	Hooded Merganser	Waterfowl	Cluster 1	B3.2
USDA	22-014405-001	USA	Wisconsin	Mississippi	2022-04-22	American white Pelican	Sea/shore bird	Cluster 1	B3.2
USDA	22-014416-001	USA	Wisconsin	Mississippi	2022-05-09	Bald eagle	Non-host wild bird	Cluster 1	B3.2
USDA	22-014430-001	USA	Montana	Pacific	2022-05-06	Owl	Non-host wild bird	Cluster 4	B4.1
USDA	22-014430-002	USA	Montana	Pacific	2022-05-06	Owl	Non-host wild bird	Cluster 4	B4.1
USDA	22-014430-003	USA	Montana	Pacific	2022-05-06	Owl	Non-host wild bird	Cluster 4	B4.1
USDA	22-014430-004	USA	Montana	Pacific	2022-05-06	Snow goose	Waterfowl	Cluster 4	B4.1
USDA	22-014431-005	USA	Washington	Pacific	2022-05-06	Snow goose	Waterfowl	Cluster 4	B4.1
USDA	22-014432-001	USA	Alaska	Pacific	2022-05-04	Canada goose	Waterfowl	Cluster 4	B4.1
USDA	22-014433-001	USA	Alaska	Pacific	2022-05-04	Canada goose	Waterfowl	Cluster 4	B4.1
USDA	22-014435-001	USA	Alaska	Pacific	2022-05-05	Canada goose	Waterfowl	Cluster 1	B3.2
USDA	22-014468-001	USA	Minnesota	Mississippi	2022-05-09	Red-tailed hawk	Non-host wild bird	Cluster 2	B2.1
USDA	22-014469-003	USA	Minnesota	Mississippi	2022-05-10	Great horned owl	Non-host wild bird	Cluster 2	B2.1
USDA	22-014479-001	USA	Washington	Pacific	2022-05-03	Bald eagle	Non-host wild bird	Cluster 4	B4.1
USDA	22-014483-001	USA	Utah	Pacific	2022-05-09	Great horned owl	Non-host wild bird	Cluster 2	B2.1
USDA	22-014489-001	USA	Wyoming	Central	2022-04-30	Great horned owl	Non-host wild bird	Cluster 3	A1
USDA	22-014489-002	USA	Wyoming	Central	2022-04-30	Great horned owl	Non-host wild bird	Cluster 3	A1
USDA	22-014510-001	USA	Minnesota	Mississippi	2022-05-03	Great horned owl	Non-host wild bird	Cluster 2	B2.1
USDA	22-014515-001	USA	North Dakota	Central	2022-05-03	Red-tailed hawk	Non-host wild bird	Cluster 1	B3.2
USDA	22-014517-001	USA	Minnesota	Mississippi	2022-05-03	Red-tailed hawk	Non-host wild bird	Cluster 3	A1
USDA	22-014518-001	USA	Minnesota	Mississippi	2022-05-04	Great horned owl	Non-host wild bird	Cluster 2	B2.1
USDA	22-014519-001	USA	Minnesota	Mississippi	2022-05-04	Red-tailed hawk	Non-host wild bird	Cluster 2	B2.1
USDA	22-014520-001	USA	Minnesota	Mississippi	2022-05-04	Turkey Vulture	Non-host wild bird	Cluster 3	A1
USDA	22-014521-001	USA	Minnesota	Mississippi	2022-05-05	Great horned owl	Non-host wild bird	Cluster 1	B3.2
USDA	22-014521-002	USA	Minnesota	Mississippi	2022-05-05	Great horned owl	Non-host wild bird	Cluster 1	B3.2
USDA	22-014522-001	USA	Minnesota	Mississippi	2022-05-05	Barred owl	Non-host wild bird	Cluster 4	B3.1
USDA	22-014523-001	USA	North Dakota	Central	2022-05-05	Turkey Vulture	Non-host wild bird	Cluster 2	B2.1
USDA	22-014524-001	USA	Minnesota	Mississippi	2022-05-03	Great horned owl	Non-host wild bird	Cluster 2	B2.1
USDA	22-014525-001	USA	Minnesota	Mississippi	2022-05-05	American white Pelican	Sea/shore bird	Cluster 1	B3.2
USDA	22-014526-001	USA	Minnesota	Mississippi	2022-05-05	Wood Duck	Waterfowl	Cluster 2	B2.1
USDA	22-014528-001	USA	Minnesota	Mississippi	2022-05-05	Bald eagle	Non-host wild bird	Cluster 2	B2.1
USDA	22-014529-001	USA	Minnesota	Mississippi	2022-05-05	Bald eagle	Non-host wild bird	Cluster 1	B3.2
USDA	22-014530-002	USA	North Dakota	Central	2022-05-05	Great horned owl	Non-host wild bird	Cluster 2	B2.1
USDA	22-014531-001	USA	North Dakota	Central	2022-05-05	Cooper's Hawk	Non-host wild bird	Cluster 4	B3.1
USDA	22-014532-001	USA	North Dakota	Central	2022-05-05	American crow	Non-host wild bird	Cluster 1	B3.2
USDA	22-014532-002	USA	North Dakota	Central	2022-05-05	American crow	Non-host wild bird	Cluster 4	B3.1
USDA	22-014533-001	USA	North Dakota	Central	2022-05-05	Sharp-shinned Hawk	Non-host wild bird	Cluster 2	B2.1
USDA	22-014533-002	USA	North Dakota	Central	2022-05-05	Red-tailed hawk	Non-host wild bird	Cluster 1	B3.2
USDA	22-014534-001	USA	North Dakota	Central	2022-05-05	Red-tailed hawk	Non-host wild bird	Cluster 2	B2.1
USDA	22-014545-001	USA	New York	Atlantic	Unknown	Peregrine falcon	Non-host wild bird	Cluster 5	B1.2
USDA	22-014649-001	USA	Wisconsin	Mississippi	2022-05-10	Bald eagle	Non-host wild bird	Cluster 2	B2.1
USDA	22-014658-004	USA	Minnesota	Mississippi	2022-05-10	Barred owl	Non-host wild bird	Cluster 1	B3.2
USDA	22-014658-007	USA	Minnesota	Mississippi	2022-05-10	Great horned owl	Non-host wild bird	Cluster 1	B3.2
USDA	22-014659-001	USA	Minnesota	Mississippi	U/1/2022	Wood Duck	Waterfowl	Cluster 3	A1
USDA	22-014659-002	USA	Minnesota	Mississippi	Unknown	Wood Duck	Waterfowl	Cluster 1	B3.2
USDA	22-014696-001	USA	Utah	Pacific	2022-05-10	Goose	Waterfowl	Cluster 4	B4.1
USDA	22-014780-001	USA	Wyoming	Central	2022-05-10	Peregrine falcon	Non-host wild bird	Cluster 4	B4.1
USDA	22-014784-001	USA	Vermont	Atlantic	2022-05-05	Duck	Domestic waterfowl	Cluster 5	B1.2
USDA	22-014853-001	USA	South Dakota	Central	2022-05-11	Turkey Vulture	Non-host wild bird	Cluster 2	B2.1
USDA	22-014874-001	USA	Montana	Pacific	2022-05-09	Owl	Non-host wild bird	Cluster 2	B2.1
USDA	22-014874-004	USA	Montana	Pacific	2022-05-09	Hawk	Non-host wild bird	Cluster 4	B4.1
USDA	22-014874-006	USA	Montana	Pacific	2022-05-09	Swan	Waterfowl	Cluster 2	B2.1
USDA	22-014899-001	USA	Minnesota	Mississippi	2022-05-10	American crow	Non-host wild bird	Cluster 3	A1
USDA	22-014910-001	USA	Wyoming	Central	2022-05-11	Turkey Vulture	Non-host wild bird	Cluster 2	B2.1
USDA	22-014919-002	USA	Wyoming	Central	2022-05-09	Sandhill crane	Non-host wild bird	Cluster 2	B2.1
USDA	22-014967-001	USA	Pennsylvania	Atlantic	2022-05-05	Black Vulture	Non-host wild bird	Cluster 6	B1.1
USDA	22-014968-001	USA	Idaho	Pacific	Unknown	Great horned owl	Non-host wild bird	Cluster 2	B2.1
USDA	22-014968-002	USA	Idaho	Pacific	Unknown	Great blue heron	Sea/shore bird	Cluster 4	B4.1
USDA	22-014968-003	USA	Idaho	Pacific	Unknown	Canada goose	Waterfowl	Cluster 2	B2.1
USDA	22-014968-004	USA	Idaho	Pacific	Unknown	Canada goose	Waterfowl	Cluster 4	B4.1
USDA	22-014968-005	USA	Idaho	Pacific	Unknown	Duck	Domestic waterfowl	Cluster 1	B3.2
USDA	22-014968-006	USA	Idaho	Pacific	Unknown	Canada goose	Waterfowl	Cluster 1	B3.2
USDA	22-014968-007	USA	Idaho	Pacific	Unknown	Turkey Vulture	Non-host wild bird	Cluster 1	B3.2
USDA	22-014968-009	USA	Idaho	Pacific	Unknown	Canada goose	Waterfowl	Cluster 4	B4.1
USDA	22-014968-010	USA	Idaho	Pacific	Unknown	Canada goose	Waterfowl	Cluster 4	B4.1
USDA	22-014968-011	USA	Idaho	Pacific	Unknown	Canada goose	Waterfowl	Cluster 4	B4.1
USDA	22-014968-012	USA	Idaho	Pacific	Unknown	Great horned owl	Non-host wild bird	Cluster 4	B4.1
USDA	22-014969-001	USA	Alaska	Pacific	Unknown	Bald eagle	Non-host wild bird	Cluster 2	B2.1
USDA	22-014971-001	USA	Alaska	Pacific	2022-05-09	Bald eagle	Non-host wild bird	Cluster 1	B3.2
USDA	22-015012-002	USA	South Carolina	Atlantic	2022-05-09	Black Vulture	Non-host wild bird	Cluster 6	B1.1
USDA	22-015016-002	USA	South Carolina	Atlantic	2022-05-10	Black Vulture	Non-host wild bird	Cluster 6	B1.1
USDA	22-015021-001	USA	New York	Atlantic	2022-04-22	Herring Gull	Sea/shore bird	Cluster 3	A2
USDA	22-015023-001	USA	New York	Atlantic	2022-05-05	Red-tailed hawk	Non-host wild bird	Cluster 6	B1.1
USDA	22-015051-001	USA	Iowa	Mississippi	2022-05-11	Great horned owl	Non-host wild bird	Cluster 2	B2.1
USDA	22-015054-001	USA	Michigan	Mississippi	Unknown	Bald eagle	Non-host wild bird	Cluster 6	B1.1
USDA	22-015054-002	USA	Michigan	Mississippi	Unknown	Bald eagle	Non-host wild bird	Cluster 5	B1.2
USDA	22-015054-004	USA	Michigan	Mississippi	Unknown	Bald eagle	Non-host wild bird	Cluster 2	B2.1
USDA	22-015054-005	USA	Michigan	Mississippi	Unknown	Bald eagle	Non-host wild bird	Cluster 5	B1.2
USDA	22-015054-006	USA	Michigan	Mississippi	U/1/2022	Bald eagle	Non-host wild bird	Cluster 3	A1
USDA	22-015054-009	USA	Michigan	Mississippi	Unknown	Bald eagle	Non-host wild bird	Cluster 5	B1.2
USDA	22-015054-010	USA	Michigan	Mississippi	Unknown	Bald eagle	Non-host wild bird	Cluster 5	B1.2
USDA	22-015054-011	USA	Michigan	Mississippi	Unknown	Bald eagle	Non-host wild bird	Cluster 2	B2.1
USDA	22-015095-001	USA	Minnesota	Mississippi	2022-05-12	Great horned owl	Non-host wild bird	Cluster 1	B3.2
USDA	22-015095-002	USA	Minnesota	Mississippi	2022-05-12	Great horned owl	Non-host wild bird	Cluster 6	B1.1
USDA	22-015196-002	USA	Minnesota	Mississippi	Unknown	Wood Duck	Waterfowl	Cluster 2	B2.1
USDA	22-015197-001	USA	Minnesota	Mississippi	2022-05-14	Bald eagle	Non-host wild bird	Cluster 2	B2.1
USDA	22-015197-002	USA	Minnesota	Mississippi	2022-05-14	Red-tailed hawk	Non-host wild bird	Cluster 1	B3.2
USDA	22-015239-001	USA	New Hampshire	Atlantic	2022-05-10	Bald eagle	Non-host wild bird	Cluster 5	B1.2
USDA	22-015248-001	USA	Utah	Pacific	2022-05-11	Owl	Non-host wild bird	Cluster 2	B2.1
USDA	22-015248-002	USA	Utah	Pacific	2022-05-12	Hawk	Non-host wild bird	Cluster 2	B2.1
USDA	22-015248-004	USA	Utah	Pacific	2022-05-14	Hawk	Non-host wild bird	Cluster 2	B2.1
USDA	22-015260-001	USA	New Jersey	Atlantic	2022-05-16	Vulture	Non-host wild bird	Cluster 6	B1.1
USDA	22-015303-001	USA	Oregon	Pacific	2022-05-10	Canada goose	Waterfowl	Cluster 4	B4.1
USDA	22-015304-001	USA	Florida	Atlantic	2022-05-11	Black Vulture	Non-host wild bird	Cluster 6	B1.1
USDA	22-015309-001	USA	Colorado	Central	2022-05-12	Great horned owl	Non-host wild bird	Cluster 2	B2.1
USDA	22-015309-002	USA	Colorado	Central	2022-05-12	Great horned owl	Non-host wild bird	Cluster 2	B2.1
USDA	22-015310-001	USA	Wisconsin	Mississippi	2022-04-27	Hooded Merganser	Waterfowl	Cluster 2	B2.1
USDA	22-015311-001	USA	Wisconsin	Mississippi	2022-04-27	Red-tailed hawk	Non-host wild bird	Cluster 2	B2.1
USDA	22-015312-001	USA	Wisconsin	Mississippi	2022-04-27	American crow	Non-host wild bird	Cluster 1	B3.2
USDA	22-015313-001	USA	South Dakota	Central	2022-05-03	Bald eagle	Non-host wild bird	Cluster 2	B2.1
USDA	22-015314-001	USA	Wisconsin	Mississippi	2022-04-28	American crow	Non-host wild bird	Cluster 1	B3.2
USDA	22-015317-001	USA	Wisconsin	Mississippi	2022-04-29	American crow	Non-host wild bird	Cluster 2	B2.1
USDA	22-015318-001	USA	Wisconsin	Mississippi	2022-05-01	Bald eagle	Non-host wild bird	Cluster 2	B2.1
USDA	22-015319-001	USA	Wisconsin	Mississippi	2022-05-01	Bald eagle	Non-host wild bird	Cluster 2	B2.1
USDA	22-015320-001	USA	Wisconsin	Mississippi	2022-05-02	Wood Duck	Waterfowl	Cluster 2	B2.1
USDA	22-015321-001	USA	Wisconsin	Mississippi	2022-05-03	Great horned owl	Non-host wild bird	Cluster 2	B2.1
USDA	22-015322-001	USA	Wisconsin	Mississippi	2022-05-04	Bald eagle	Non-host wild bird	Cluster 2	B2.1
USDA	22-015323-001	USA	Wisconsin	Mississippi	2022-05-10	Red-tailed hawk	Non-host wild bird	Cluster 2	B2.1
USDA	22-015324-001	USA	South Dakota	Central	2022-04-27	Red-tailed hawk	Non-host wild bird	Cluster 2	B2.1
USDA	22-015324-003	USA	South Dakota	Central	2022-04-27	Red-tailed hawk	Non-host wild bird	Cluster 2	B2.1
USDA	22-015324-004	USA	South Dakota	Central	2022-04-27	Red-tailed hawk	Non-host wild bird	Cluster 2	B2.1
USDA	22-015324-005	USA	South Dakota	Central	2022-04-27	Great horned owl	Non-host wild bird	Cluster 2	B2.1
USDA	22-015413-001	USA	Oregon	Pacific	2022-05-11	Canada goose	Waterfowl	Cluster 4	B4.1
USDA	22-015413-002	USA	Oregon	Pacific	2022-05-11	Canada goose	Waterfowl	Cluster 4	B4.1
USDA	22-015417-001	USA	Oregon	Pacific	2022-05-10	Red-tailed hawk	Non-host wild bird	Cluster 4	B4.1
USDA	22-015458-001	USA	Minnesota	Mississippi	2022-05-12	Great horned owl	Non-host wild bird	Cluster 1	B3.2
USDA	22-015508-001	USA	Utah	Pacific	Unknown	Mallard	Waterfowl	Cluster 4	B4.1
USDA	22-015509-001	USA	Utah	Pacific	2022-05-16	Turkey Vulture	Non-host wild bird	Cluster 2	B2.1
USDA	22-015514-001	USA	Wyoming	Central	2022-05-10	Sharp-shinned Hawk	Non-host wild bird	Cluster 4	B4.1
USDA	22-015514-002	USA	Wyoming	Central	2022-05-10	Sharp-shinned Hawk	Non-host wild bird	Cluster 4	B4.1
USDA	22-015516-001	USA	Wyoming	Central	2022-05-09	Red-tailed hawk	Non-host wild bird	Cluster 4	B4.1
USDA	22-015521-007	USA	Washington	Pacific	2022-05-10	Bald eagle	Non-host wild bird	Cluster 4	B4.1
USDA	22-015522-002	USA	Washington	Pacific	2022-05-12	Great horned owl	Non-host wild bird	Cluster 2	B2.1
USDA	22-015523-002	USA	Washington	Pacific	2022-05-13	Canada goose	Waterfowl	Cluster 2	B2.1
USDA	22-015525-002	USA	Washington	Pacific	2022-05-11	Red-tailed hawk	Non-host wild bird	Cluster 4	B4.1
USDA	22-015526-002	USA	Washington	Pacific	Unknown	Canada goose	Waterfowl	Cluster 1	B3.2
USDA	22-015526-003	USA	Washington	Pacific	Unknown	Canada goose	Waterfowl	Cluster 1	B3.2
USDA	22-015526-004	USA	Washington	Pacific	Unknown	Great horned owl	Non-host wild bird	Cluster 1	B3.2
USDA	22-015526-005	USA	Washington	Pacific	Unknown	Canada goose	Waterfowl	Cluster 1	B3.2
USDA	22-015526-006	USA	Washington	Pacific	Unknown	Western screech owl	Non-host wild bird	Cluster 1	B3.2
USDA	22-015545-001	USA	Wisconsin	Mississippi	2022-05-16	Bald eagle	Non-host wild bird	Cluster 3	A1
USDA	22-015563-001	USA	Montana	Pacific	2022-05-16	Hawk	Non-host wild bird	Cluster 4	B3.1
USDA	22-015563-002	USA	Montana	Pacific	2022-05-16	Canada goose	Waterfowl	Cluster 4	B4.1
USDA	22-015563-004	USA	Montana	Pacific	2022-05-16	Hawk	Non-host wild bird	Cluster 4	B4.1
USDA	22-015576-001	USA	North Dakota	Central	2022-05-12	Great horned owl	Non-host wild bird	Cluster 4	B3.1
USDA	22-015577-001	USA	North Dakota	Central	2022-05-12	American crow	Non-host wild bird	Cluster 4	B3.1
USDA	22-015577-002	USA	North Dakota	Central	2022-05-12	American crow	Non-host wild bird	Cluster 4	B3.1
USDA	22-015577-004	USA	North Dakota	Central	2022-05-12	American crow	Non-host wild bird	Cluster 4	B3.1
USDA	22-015578-001	USA	North Dakota	Central	2022-05-12	Red-tailed hawk	Non-host wild bird	Cluster 2	B2.1
USDA	22-015579-001	USA	North Dakota	Central	2022-05-12	American kestrel	Non-host wild bird	Cluster 2	B2.1
USDA	22-015580-001	USA	North Dakota	Central	2022-05-12	Hawk	Non-host wild bird	Cluster 2	B2.1
USDA	22-015581-001	USA	North Dakota	Central	2022-05-12	Bald eagle	Non-host wild bird	Cluster 6	B1.1
USDA	22-015585-001	USA	North Dakota	Central	2022-05-12	Broad-winged Hawk	Non-host wild bird	Cluster 4	B3.1
USDA	22-015627-002	USA	Utah	Pacific	2022-05-16	Pelican	Sea/shore bird	Cluster 4	B4.1
USDA	22-015660-001	USA	South Carolina	Atlantic	2022-05-10	Black Vulture	Non-host wild bird	Cluster 6	B1.1
USDA	22-015660-002	USA	South Carolina	Atlantic	2022-05-10	Black Vulture	Non-host wild bird	Cluster 6	B1.1
USDA	22-015660-003	USA	South Carolina	Atlantic	2022-05-10	Black Vulture	Non-host wild bird	Cluster 6	B1.1
USDA	22-015665-001	USA	New York	Atlantic	2022-05-13	Bald eagle	Non-host wild bird	Cluster 5	B1.2
USDA	22-015666-001	USA	New York	Atlantic	2022-05-13	Red-tailed hawk	Non-host wild bird	Cluster 3	A2
USDA	22-015668-001	USA	New York	Atlantic	2022-05-13	Bald eagle	Non-host wild bird	Cluster 5	B1.2
USDA	22-015674-001	USA	Minnesota	Mississippi	Unknown	American crow	Non-host wild bird	Cluster 1	B3.2
USDA	22-015675-001	USA	Minnesota	Mississippi	2022-05-17	Red-tailed hawk	Non-host wild bird	Cluster 3	A1
USDA	22-015676-001	USA	Minnesota	Mississippi	Unknown	Bald eagle	Non-host wild bird	Cluster 2	B2.1
USDA	22-015680-001	USA	Alaska	Pacific	2022-05-11	Bald eagle	Non-host wild bird	Cluster 3	A3
USDA	22-015682-001	USA	Alaska	Pacific	2022-05-11	Bald eagle	Non-host wild bird	Cluster 3	A3
USDA	22-015683-001	USA	Alaska	Pacific	2022-05-16	Canada goose	Waterfowl	Cluster 4	B4.1
USDA	22-015733-001	USA	Oregon	Pacific	2022-05-16	Canada goose	Waterfowl	Cluster 4	B4.1
USDA	22-015734-001	USA	Oregon	Pacific	2022-05-16	Canada goose	Waterfowl	Cluster 2	B2.1
USDA	22-015783-001	USA	Minnesota	Mississippi	2022-05-18	Bald eagle	Non-host wild bird	Cluster 4	B4.1
USDA	22-015789-001	USA	Florida	Atlantic	2022-05-15	Black Vulture	Non-host wild bird	Cluster 5	B1.2
USDA	22-015791-001	USA	Florida	Atlantic	2022-05-18	Black Vulture	Non-host wild bird	Cluster 2	B2.1
USDA	22-015799-001	USA	Colorado	Central	2022-05-17	Canada goose	Waterfowl	Cluster 6	B1.1
USDA	22-015801-001	USA	Indiana	Mississippi	2022-05-12	Double-crested Cormorant	Sea/shore bird	Cluster 6	B1.1
USDA	22-015802-001	USA	North Dakota	Central	2022-05-17	American white Pelican	Sea/shore bird	Cluster 6	B1.1
USDA	22-015803-001	USA	North Dakota	Central	2022-05-17	Turkey Vulture	Non-host wild bird	Cluster 2	B2.1
USDA	22-015804-001	USA	North Dakota	Central	2022-05-17	American white Pelican	Sea/shore bird	Cluster 4	B4.1
USDA	22-015805-001	USA	North Dakota	Central	2022-05-17	Snowy egret	Sea/shore bird	Cluster 3	A1
USDA	22-015806-002	USA	North Dakota	Central	2022-05-17	Canada goose	Waterfowl	Cluster 4	B4.1
USDA	22-015807-001	USA	North Dakota	Central	2022-05-17	Double-crested Cormorant	Sea/shore bird	Cluster 4	B4.1
USDA	22-015811-001	USA	Washington	Pacific	2022-05-18	Mallard	Waterfowl	Cluster 4	B4.1
USDA	22-015812-001	USA	Wyoming	Central	2022-05-12	Red-tailed hawk	Non-host wild bird	Cluster 6	B1.1
USDA	22-015813-002	USA	Wyoming	Central	2022-05-12	Red-tailed hawk	Non-host wild bird	Cluster 4	B3.1
USDA	22-015814-001	USA	Washington	Pacific	2022-05-18	Canada goose	Waterfowl	Cluster 2	B2.1
USDA	22-015815-001	USA	Wyoming	Central	2022-05-18	Common loon	Waterfowl	Cluster 4	B3.1
USDA	22-015816-001	USA	Washington	Pacific	2022-05-18	Canada goose	Waterfowl	Cluster 4	B4.1
USDA	22-015817-001	USA	Washington	Pacific	2022-05-18	Canada goose	Waterfowl	Cluster 2	B2.1
USDA	22-015900-001	USA	Maryland	Atlantic	2022-05-19	Black Vulture	Non-host wild bird	Cluster 6	B1.1
USDA	22-015921-001	USA	Utah	Pacific	2022-05-18	Canada goose	Waterfowl	Cluster 4	B4.1
USDA	22-015925-001	USA	Utah	Pacific	2022-05-18	Turkey Vulture	Non-host wild bird	Cluster 2	B2.1
USDA	22-015926-001	USA	Oregon	Pacific	2022-05-17	Red-tailed hawk	Non-host wild bird	Cluster 4	B4.1
USDA	22-015937-001	USA	New York	Atlantic	2022-05-19	Turkey Vulture	Non-host wild bird	Cluster 5	B1.2
USDA	22-016060-001	USA	Washington	Pacific	2022-05-11	Bald eagle	Non-host wild bird	Cluster 4	B4.1
USDA	22-016061-001	USA	Washington	Pacific	2022-05-19	Raven	Non-host wild bird	Cluster 4	B4.1
USDA	22-016064-001	USA	Washington	Pacific	2022-04-19	Canada goose	Waterfowl	Cluster 2	B2.1
USDA	22-016064-002	USA	Washington	Pacific	2022-04-19	Canada goose	Waterfowl	Cluster 2	B2.1
USDA	22-016115-001	USA	Florida	Atlantic	2022-05-20	Black Vulture	Non-host wild bird	Cluster 6	B1.1
USDA	22-016116-001	USA	Florida	Atlantic	2022-05-18	Black Vulture	Non-host wild bird	Cluster 6	B1.1
USDA	22-016119-001	USA	New Jersey	Atlantic	2022-05-18	Black Vulture	Non-host wild bird	Cluster 6	B1.1
USDA	22-016119-002	USA	New Jersey	Atlantic	2022-05-18	Black Vulture	Non-host wild bird	Cluster 6	B1.1
USDA	22-016119-003	USA	New Jersey	Atlantic	2022-05-18	Black Vulture	Non-host wild bird	Cluster 6	B1.1
USDA	22-016119-004	USA	New Jersey	Atlantic	2022-05-18	Black Vulture	Non-host wild bird	Cluster 6	B1.1
USDA	22-016119-005	USA	New Jersey	Atlantic	2022-05-18	Black Vulture	Non-host wild bird	Cluster 6	B1.1
USDA	22-016225-001	USA	Minnesota	Mississippi	2022-05-23	Peregrine falcon	Non-host wild bird	Cluster 1	B3.2
USDA	22-016226-001	USA	Minnesota	Mississippi	2022-05-23	Red-tailed hawk	Non-host wild bird	Cluster 2	B2.1
USDA	22-016227-001	USA	Minnesota	Mississippi	2022-05-23	Red-tailed hawk	Non-host wild bird	Cluster 1	B3.2
USDA	22-016228-001	USA	Minnesota	Mississippi	2022-05-23	Red-tailed hawk	Non-host wild bird	Cluster 4	B3.1
USDA	22-016238-001	USA	Washington	Pacific	2022-05-19	Canada goose	Waterfowl	Cluster 4	B4.1
USDA	22-016273-001	USA	Wyoming	Central	2022-05-18	Red-tailed hawk	Non-host wild bird	Cluster 4	B4.1
USDA	22-016277-001	USA	Wisconsin	Mississippi	2022-04-30	American crow	Non-host wild bird	Cluster 1	B3.2
USDA	22-016279-001	USA	Wisconsin	Mississippi	2022-05-02	Wood Duck	Waterfowl	Cluster 1	B3.2
USDA	22-016280-001	USA	Wisconsin	Mississippi	2022-05-02	Turkey Vulture	Non-host wild bird	Cluster 2	B2.1
USDA	22-016280-002	USA	Wisconsin	Mississippi	2022-05-02	Turkey Vulture	Non-host wild bird	Cluster 2	B2.1
USDA	22-016281-001	USA	Wisconsin	Mississippi	2022-05-03	Wood Duck	Waterfowl	Cluster 2	B2.1
USDA	22-016283-001	USA	Minnesota	Mississippi	2022-05-12	Bald eagle	Non-host wild bird	Cluster 2	B2.1
USDA	22-016284-001	USA	Minnesota	Mississippi	2022-05-17	Barred owl	Non-host wild bird	Cluster 1	B3.2
USDA	22-016285-001	USA	Minnesota	Mississippi	2022-05-19	common goldeneye	Waterfowl	Cluster 2	B2.1
USDA	22-016287-001	USA	Minnesota	Mississippi	2022-05-19	Barred owl	Non-host wild bird	Cluster 2	B2.1
USDA	22-016288-001	USA	Minnesota	Mississippi	2022-05-19	Great horned owl	Non-host wild bird	Cluster 2	B2.1
USDA	22-016410-001	USA	Florida	Atlantic	2022-05-11	Muscovy Duck	Waterfowl	Cluster 6	B1.1
USDA	22-016455-001	USA	Alaska	Pacific	2022-05-20	Bald eagle	Non-host wild bird	Cluster 4	B4.1
USDA	22-016456-001	USA	Alaska	Pacific	2022-05-20	Bald eagle	Non-host wild bird	Cluster 4	B4.1
USDA	22-016457-007	USA	Idaho	Pacific	Unknown	Swainson's Hawk	Non-host wild bird	Cluster 4	B3.1
USDA	22-016457-008	USA	Idaho	Pacific	Unknown	Swainson's Hawk	Non-host wild bird	Cluster 2	B2.1
USDA	22-016457-009	USA	Idaho	Pacific	Unknown	Red-tailed hawk	Non-host wild bird	Cluster 4	B4.1
USDA	22-016457-010	USA	Idaho	Pacific	Unknown	Swainson's Hawk	Non-host wild bird	Cluster 4	B4.1
USDA	22-016457-011	USA	Idaho	Pacific	Unknown	Great horned owl	Non-host wild bird	Cluster 2	B2.1
USDA	22-016486-001	USA	New York	Atlantic	2022-05-19	Turkey Vulture	Non-host wild bird	Cluster 5	B1.2
USDA	22-016517-001	USA	Maryland	Atlantic	2022-05-24	Black Vulture	Non-host wild bird	Cluster 6	B1.1
USDA	22-016517-002	USA	Maryland	Atlantic	2022-05-24	Black Vulture	Non-host wild bird	Cluster 6	B1.1
USDA	22-016539-001	USA	Indiana	Mississippi	2022-05-24	Red-tailed hawk	Non-host wild bird	Cluster 5	B1.2
USDA	22-016540-002	USA	Indiana	Mississippi	2022-05-25	Great horned owl	Non-host wild bird	Cluster 5	B1.2
USDA	22-016541-001	USA	Indiana	Mississippi	2022-05-25	Red-tailed hawk	Non-host wild bird	Cluster 5	B1.2
USDA	22-016570-001	USA	Colorado	Central	2022-05-24	Great horned owl	Non-host wild bird	Cluster 2	B2.1
USDA	22-016581-001	USA	Florida	Atlantic	2022-05-21	Black Vulture	Non-host wild bird	Cluster 6	B1.1
USDA	22-016599-001	USA	New Jersey	Atlantic	2022-05-19	Black Vulture	Non-host wild bird	Cluster 6	B1.1
USDA	22-016599-002	USA	New Jersey	Atlantic	2022-05-19	Black Vulture	Non-host wild bird	Cluster 6	B1.1
USDA	22-016599-003	USA	New Jersey	Atlantic	2022-05-19	Black Vulture	Non-host wild bird	Cluster 6	B1.1
USDA	22-016599-004	USA	New Jersey	Atlantic	2022-05-19	Black Vulture	Non-host wild bird	Cluster 6	B1.1
USDA	22-016599-005	USA	New Jersey	Atlantic	2022-05-19	Black Vulture	Non-host wild bird	Cluster 6	B1.1
USDA	22-016599-006	USA	New Jersey	Atlantic	2022-05-19	Black Vulture	Non-host wild bird	Cluster 6	B1.1
USDA	22-016599-007	USA	New Jersey	Atlantic	2022-05-19	Black Vulture	Non-host wild bird	Cluster 6	B1.1
USDA	22-016599-009	USA	New Jersey	Atlantic	2022-05-19	Black Vulture	Non-host wild bird	Cluster 6	B1.1
USDA	22-016602-001	USA	New Jersey	Atlantic	2022-05-24	Black Vulture	Non-host wild bird	Cluster 6	B1.1
USDA	22-016602-002	USA	New Jersey	Atlantic	2022-05-24	Black Vulture	Non-host wild bird	Cluster 6	B1.1
USDA	22-016602-003	USA	New Jersey	Atlantic	2022-05-24	Black Vulture	Non-host wild bird	Cluster 6	B1.1
USDA	22-016602-004	USA	New Jersey	Atlantic	2022-05-24	Black Vulture	Non-host wild bird	Cluster 6	B1.1
USDA	22-016602-005	USA	New Jersey	Atlantic	2022-05-24	Black Vulture	Non-host wild bird	Cluster 6	B1.1
USDA	22-016611-002	USA	Massachusetts	Atlantic	2022-04-01	Snowy owl	Non-host wild bird	Cluster 3	A1
USDA	22-016611-003	USA	Massachusetts	Atlantic	2022-04-01	Snowy owl	Non-host wild bird	Cluster 3	A1
USDA	22-016611-006	USA	Massachusetts	Atlantic	2022-04-01	Gull	Sea/shore bird	Cluster 3	A2
USDA	22-016611-009	USA	Massachusetts	Atlantic	2022-04-01	Gull	Sea/shore bird	Cluster 3	A2
USDA	22-016611-010	USA	Massachusetts	Atlantic	2022-04-01	Snowy owl	Non-host wild bird	Cluster 3	A1
USDA	22-016611-012	USA	Massachusetts	Atlantic	2022-04-01	Snowy owl	Non-host wild bird	Cluster 3	A1
USDA	22-016611-015	USA	Massachusetts	Atlantic	2022-04-01	Gannet	Sea/shore bird	Cluster 3	A2
USDA	22-016659-001	USA	Pennsylvania	Atlantic	2022-05-25	Black Vulture	Non-host wild bird	Cluster 6	B1.1
USDA	22-016660-001	USA	Pennsylvania	Atlantic	2022-05-12	Black Vulture	Non-host wild bird	Cluster 6	B1.1
USDA	22-016660-002	USA	Pennsylvania	Atlantic	2022-05-12	Black Vulture	Non-host wild bird	Cluster 6	B1.1
USDA	22-016661-001	USA	Pennsylvania	Atlantic	2022-05-12	Turkey Vulture	Non-host wild bird	Cluster 3	A1
USDA	22-016701-001	USA	Wisconsin	Mississippi	2022-05-25	Bald eagle	Non-host wild bird	Cluster 2	B2.1
USDA	22-016837-001	USA	Utah	Pacific	Unknown	Turkey Vulture	Non-host wild bird	Cluster 4	B4.1
USDA	22-016894-001	USA	Minnesota	Mississippi	2022-05-25	Bald eagle	Non-host wild bird	Cluster 5	B1.2
USDA	22-016934-001	USA	Alaska	Pacific	2022-05-14	Bald eagle	Non-host wild bird	Cluster 4	B4.1
USDA	22-016934-002	USA	Alaska	Pacific	2022-05-18	Bald eagle	Non-host wild bird	Cluster 4	B4.1
USDA	22-016934-003	USA	Alaska	Pacific	2022-05-21	Bald eagle	Non-host wild bird	Cluster 4	B4.1
USDA	22-016934-004	USA	Alaska	Pacific	2022-05-22	Bald eagle	Non-host wild bird	Cluster 1	B3.2
USDA	22-016938-001	USA	Washington	Pacific	2022-05-23	Canada goose	Waterfowl	Cluster 4	B4.1
USDA	22-016939-001	USA	Washington	Pacific	2022-05-23	Canada goose	Waterfowl	Cluster 4	B4.1
USDA	22-016940-001	USA	Washington	Pacific	2022-05-22	Mallard	Waterfowl	Cluster 4	B4.1
USDA	22-016941-001	USA	Washington	Pacific	2022-05-22	Mallard	Waterfowl	Cluster 4	B4.1
USDA	22-016942-001	USA	Washington	Pacific	2022-05-22	Mallard	Waterfowl	Cluster 4	B4.1
USDA	22-016943-001	USA	Washington	Pacific	2022-05-22	Mallard	Waterfowl	Cluster 4	B4.1
USDA	22-016973-001	USA	Florida	Atlantic	2022-05-25	Black Vulture	Non-host wild bird	Cluster 6	B1.1
USDA	22-017052-001	USA	Wisconsin	Mississippi	2022-05-04	Herring Gull	Sea/shore bird	Cluster 6	B1.1
USDA	22-017052-005	USA	Wisconsin	Mississippi	2022-05-24	Double-crested Cormorant	Sea/shore bird	Cluster 6	B1.1
USDA	22-017057-001	USA	Minnesota	Mississippi	Unknown	American white Pelican	Sea/shore bird	Cluster 1	B3.2
USDA	22-017058-002	USA	Minnesota	Mississippi	Unknown	Pelican	Sea/shore bird	Cluster 1	B3.2
USDA	22-017059-001	USA	Illinois	Mississippi	2022-05-20	Double-crested Cormorant	Sea/shore bird	Cluster 6	B1.1
USDA	22-017059-002	USA	Illinois	Mississippi	2022-05-20	Double-crested Cormorant	Sea/shore bird	Cluster 6	B1.1
USDA	22-017059-003	USA	Illinois	Mississippi	2022-05-19	Double-crested Cormorant	Sea/shore bird	Cluster 6	B1.1
USDA	22-017060-001	USA	Illinois	Mississippi	2022-05-16	Canada goose	Waterfowl	Cluster 2	B2.1
USDA	22-017060-002	USA	Illinois	Mississippi	2022-05-16	Canada goose	Waterfowl	Cluster 2	B2.1
USDA	22-017061-001	USA	North Dakota	Central	2022-05-23	Red Fox	Mammal	Cluster 4	B3.1
USDA	22-017061-002	USA	North Dakota	Central	2022-05-23	Red Fox	Mammal	Cluster 4	B3.1
USDA	22-017063-001	USA	Arizona	Pacific	2022-05-23	Neotropic Cormorant	Sea/shore bird	Cluster 6	B1.1
USDA	22-017063-002	USA	Arizona	Pacific	2022-05-23	Neotropic Cormorant	Sea/shore bird	Cluster 6	B1.1
USDA	22-017193-001	USA	Montana	Pacific	2022-05-27	Great horned owl	Non-host wild bird	Cluster 4	B4.1
USDA	22-017243-001	USA	Michigan	Mississippi	2022-05-23	Herring Gull	Sea/shore bird	Cluster 5	B1.2
USDA	22-017243-004	USA	Michigan	Mississippi	2022-05-23	Bald eagle	Non-host wild bird	Cluster 6	B1.1
USDA	22-017243-005	USA	Michigan	Mississippi	2022-05-23	Bald eagle	Non-host wild bird	Cluster 6	B1.1
USDA	22-017243-006	USA	Michigan	Mississippi	2022-05-23	Bald eagle	Non-host wild bird	Cluster 6	B1.1
USDA	22-017243-007	USA	Michigan	Mississippi	2022-05-23	Bald eagle	Non-host wild bird	Cluster 5	B1.2
USDA	22-017243-010	USA	Michigan	Mississippi	2022-05-23	Bald eagle	Non-host wild bird	Cluster 5	B1.2
USDA	22-017243-011	USA	Michigan	Mississippi	2022-05-23	Bald eagle	Non-host wild bird	Cluster 5	B1.2
USDA	22-017243-012	USA	Michigan	Mississippi	2022-05-23	Bald eagle	Non-host wild bird	Cluster 5	B1.2
USDA	22-017243-013	USA	Michigan	Mississippi	2022-05-23	Bald eagle	Non-host wild bird	Cluster 5	B1.2
USDA	22-017243-015	USA	Michigan	Mississippi	2022-05-23	Snowy owl	Non-host wild bird	Cluster 5	B1.2
USDA	22-017243-020	USA	Michigan	Mississippi	2022-05-23	Red-tailed hawk	Non-host wild bird	Cluster 2	B2.1
USDA	22-017243-021	USA	Michigan	Mississippi	2022-05-23	Duck	Domestic waterfowl	Cluster 2	B2.1
USDA	22-017243-022	USA	Michigan	Mississippi	2022-05-23	Bald eagle	Non-host wild bird	Cluster 5	B1.2
USDA	22-017243-023	USA	Michigan	Mississippi	2022-05-23	Peregrine falcon	Non-host wild bird	Cluster 2	B2.1
USDA	22-017243-024	USA	Michigan	Mississippi	2022-05-23	Red-tailed hawk	Non-host wild bird	Cluster 2	B2.1
USDA	22-017264-001	USA	Georgia	Atlantic	2022-05-31	Black Vulture	Non-host wild bird	Cluster 6	B1.1
USDA	22-017264-002	USA	Georgia	Atlantic	2022-05-31	Black Vulture	Non-host wild bird	Cluster 6	B1.1
USDA	22-017264-003	USA	Georgia	Atlantic	2022-05-31	Black Vulture	Non-host wild bird	Cluster 6	B1.1
USDA	22-017275-002	USA	Minnesota	Mississippi	Unknown	Great horned owl	Non-host wild bird	Cluster 1	B3.2
USDA	22-017360-002	USA	Idaho	Pacific	2022-05-31	Canada goose	Waterfowl	Cluster 1	B3.2
USDA	22-017361-001	USA	Washington	Pacific	2022-05-26	Canada goose	Waterfowl	Cluster 2	B2.1
USDA	22-017361-002	USA	Washington	Pacific	2022-05-26	Canada goose	Waterfowl	Cluster 2	B2.1
USDA	22-017361-003	USA	Washington	Pacific	2022-05-26	Canada goose	Waterfowl	Cluster 2	B2.1
USDA	22-017363-001	USA	Alaska	Pacific	2022-05-27	Brant	Waterfowl	Cluster 4	B3.1
USDA	22-017364-001	USA	Alaska	Pacific	2022-05-27	Snow goose	Waterfowl	Cluster 1	B3.2
USDA	22-017504-001	USA	Pennsylvania	Atlantic	2022-06-03	Black Vulture	Non-host wild bird	Cluster 6	B1.1
USDA	22-017507-002	USA	Michigan	Mississippi	Unknown	American crow	Non-host wild bird	Cluster 5	B1.2
USDA	22-017510-001	USA	Oregon	Pacific	2022-05-26	Bald eagle	Non-host wild bird	Cluster 4	B4.1
USDA	22-017550-001	USA	Wisconsin	Mississippi	2022-05-08	Bald eagle	Non-host wild bird	Cluster 5	B1.2
USDA	22-017570-001	USA	New York	Atlantic	2022-06-01	Bald eagle	Non-host wild bird	Cluster 3	A1
USDA	22-017571-001	USA	New York	Atlantic	2022-06-02	Bald eagle	Non-host wild bird	Cluster 5	B1.2
USDA	22-017572-001	USA	New York	Atlantic	2022-06-01	Bald eagle	Non-host wild bird	Cluster 3	A1
USDA	22-017620-001	USA	Minnesota	Mississippi	Unknown	Bald eagle	Non-host wild bird	Cluster 2	B2.1
USDA	22-017695-001	USA	Utah	Pacific	Unknown	Goose	Waterfowl	Cluster 1	B3.2
USDA	22-017713-001	USA	Texas	Central	2022-03-08	Peregrine falcon	Non-host wild bird	Cluster 3	A1
USDA	22-017717-001	USA	Wisconsin	Mississippi	2022-06-02	Caspian tern	Sea/shore bird	Cluster 5	B1.2
USDA	22-017717-002	USA	Wisconsin	Mississippi	2022-06-02	Caspian tern	Sea/shore bird	Cluster 5	B1.2
USDA	22-017717-003	USA	Wisconsin	Mississippi	2022-06-02	Caspian tern	Sea/shore bird	Cluster 6	B1.1
USDA	22-017717-004	USA	Wisconsin	Mississippi	2022-06-02	Caspian tern	Sea/shore bird	Cluster 6	B1.1
USDA	22-017717-005	USA	Wisconsin	Mississippi	2022-06-02	Caspian tern	Sea/shore bird	Cluster 5	B1.2
USDA	22-017769-001	USA	Minnesota	Mississippi	2022-06-03	Pelican	Sea/shore bird	Cluster 1	B3.2
USDA	22-017774-001	USA	Wyoming	Central	2022-06-03	Horned grebe	Waterfowl	Cluster 3	A1
USDA	22-017774-003	USA	Wyoming	Central	2022-06-03	Horned grebe	Waterfowl	Cluster 3	A1
USDA	22-017777-001	USA	Wyoming	Central	2022-05-22	Red-tailed hawk	Non-host wild bird	Cluster 2	B2.1
USDA	22-017777-002	USA	Wyoming	Central	2022-05-22	Red-tailed hawk	Non-host wild bird	Cluster 2	B2.1
USDA	22-017864-001	USA	Idaho	Pacific	2022-06-06	Hawk	Non-host wild bird	Cluster 1	B3.2
USDA	22-017940-001	USA	Minnesota	Mississippi	2022-06-06	American white Pelican	Sea/shore bird	Cluster 1	B3.2
USDA	22-017940-003	USA	Minnesota	Mississippi	2022-06-06	Ring-billed gull	Sea/shore bird	Cluster 1	B3.2
USDA	22-017940-004	USA	Minnesota	Mississippi	2022-06-06	Ring-billed gull	Sea/shore bird	Cluster 1	B3.2
USDA	22-017940-006	USA	Minnesota	Mississippi	2022-06-06	Caspian tern	Sea/shore bird	Cluster 2	B2.1
USDA	22-017940-007	USA	Minnesota	Mississippi	2022-06-06	Double-crested Cormorant	Sea/shore bird	Cluster 1	B3.2
USDA	22-017940-008	USA	Minnesota	Mississippi	2022-06-06	Double-crested Cormorant	Sea/shore bird	Cluster 1	B3.2
USDA	22-017940-009	USA	Minnesota	Mississippi	2022-06-06	Common tern	Sea/shore bird	Cluster 1	B3.2
USDA	22-017940-010	USA	Minnesota	Mississippi	2022-06-06	Common tern	Sea/shore bird	Cluster 1	B3.2
USDA	22-017947-001	USA	Wyoming	Central	2022-06-06	Eared grebe	Waterfowl	Cluster 3	A1
USDA	22-017947-002	USA	Wyoming	Central	2022-06-06	Eared grebe	Waterfowl	Cluster 3	A1
USDA	22-017950-001	USA	Alaska	Pacific	2022-06-02	Bald eagle	Non-host wild bird	Cluster 3	A3
USDA	22-017953-001	USA	Alaska	Pacific	2022-06-06	Black brant	Waterfowl	Cluster 1	B3.2
USDA	22-017953-002	USA	Alaska	Pacific	2022-06-06	Black brant	Waterfowl	Cluster 1	B3.2
USDA	22-017953-003	USA	Alaska	Pacific	2022-06-06	Glaucous Gull	Sea/shore bird	Cluster 1	B3.2
USDA	22-017953-004	USA	Alaska	Pacific	2022-06-06	Glaucous Gull	Sea/shore bird	Cluster 1	B3.2
USDA	22-017953-005	USA	Alaska	Pacific	2022-06-06	Gull	Sea/shore bird	Cluster 4	B3.1
USDA	22-017953-006	USA	Alaska	Pacific	2022-06-06	Gull	Sea/shore bird	Cluster 1	B3.2
USDA	22-017953-007	USA	Alaska	Pacific	2022-06-06	Gull	Sea/shore bird	Cluster 1	B3.2
USDA	22-017953-009	USA	Alaska	Pacific	2022-06-06	Glaucous Gull	Sea/shore bird	Cluster 1	B3.2
USDA	22-017953-010	USA	Alaska	Pacific	2022-06-06	Glaucous Gull	Sea/shore bird	Cluster 1	B3.2
USDA	22-018027-001	USA	Florida	Atlantic	2022-06-04	Black Vulture	Non-host wild bird	Cluster 6	B1.1
USDA	22-018088-001	USA	Minnesota	Mississippi	Unknown	Eagle	Non-host wild bird	Cluster 2	B2.1
USDA	22-018099-001	USA	Washington	Pacific	2022-06-06	Gull	Sea/shore bird	Cluster 2	B2.1
USDA	22-018101-001	USA	Alaska	Pacific	2022-06-06	Black brant	Waterfowl	Cluster 4	B4.1
USDA	22-018101-002	USA	Alaska	Pacific	2022-06-06	Glaucous Gull	Sea/shore bird	Cluster 1	B3.2
USDA	22-018102-001	USA	Washington	Pacific	2022-06-06	Bald eagle	Non-host wild bird	Cluster 4	B4.1
USDA	22-018119-001	USA	Pennsylvania	Atlantic	2022-06-06	Black Vulture	Non-host wild bird	Cluster 6	B1.1
USDA	22-018119-002	USA	Pennsylvania	Atlantic	2022-06-06	Black Vulture	Non-host wild bird	Cluster 6	B1.1
USDA	22-018121-001	USA	North Dakota	Central	2022-06-08	Hawk	Non-host wild bird	Cluster 2	B2.1
USDA	22-018174-001	USA	Pennsylvania	Atlantic	2022-06-07	Black Vulture	Non-host wild bird	Cluster 6	B1.1
USDA	22-018174-002	USA	Pennsylvania	Atlantic	2022-06-07	Black Vulture	Non-host wild bird	Cluster 6	B1.1
USDA	22-018176-001	USA	Utah	Pacific	2022-06-08	Goose	Waterfowl	Cluster 1	B3.2
USDA	22-018176-002	USA	Utah	Pacific	2022-06-08	Goose	Waterfowl	Cluster 1	B3.2
USDA	22-018176-003	USA	Utah	Pacific	2022-06-08	Goose	Waterfowl	Cluster 1	B3.2
USDA	22-018176-005	USA	Utah	Pacific	2022-06-08	Hawk	Non-host wild bird	Cluster 1	B3.2
USDA	22-018179-001	USA	Utah	Pacific	2022-06-09	Hawk	Non-host wild bird	Cluster 2	B2.1
USDA	22-018184-001	USA	Indiana	Mississippi	2022-06-09	Red-tailed hawk	Non-host wild bird	Cluster 5	B1.2
USDA	22-018401-001	USA	Alaska	Pacific	2022-06-06	Red-necked grebe	Waterfowl	Cluster 4	B3.1
USDA	22-018402-001	USA	Washington	Pacific	2022-05-29	Canada goose	Waterfowl	Cluster 4	B4.1
USDA	22-018403-001	USA	Washington	Pacific	2022-06-07	Bald eagle	Non-host wild bird	Cluster 2	B2.1
USDA	22-018405-001	USA	Washington	Pacific	2022-05-27	Canada goose	Waterfowl	Cluster 4	B4.1
USDA	22-018408-001	USA	Washington	Pacific	2022-05-23	Canada goose	Waterfowl	Cluster 4	B4.1
USDA	22-018423-001	USA	Minnesota	Mississippi	2022-06-08	American white Pelican	Sea/shore bird	Cluster 1	B3.2
USDA	22-018423-002	USA	Minnesota	Mississippi	2022-06-08	American white Pelican	Sea/shore bird	Cluster 1	B3.2
USDA	22-018423-004	USA	Minnesota	Mississippi	2022-06-09	American white Pelican	Sea/shore bird	Cluster 1	B3.2
USDA	22-018423-005	USA	Minnesota	Mississippi	2022-06-09	Double-crested Cormorant	Sea/shore bird	Cluster 1	B3.2
USDA	22-018474-001	USA	Montana	Pacific	2022-06-09	Great horned owl	Non-host wild bird	Cluster 2	B2.1
USDA	22-018474-002	USA	Montana	Pacific	2022-06-09	Great horned owl	Non-host wild bird	Cluster 2	B2.1
USDA	22-018474-003	USA	Montana	Pacific	2022-06-09	Red-tailed hawk	Non-host wild bird	Cluster 4	B3.1
USDA	22-018475-001	USA	Oregon	Pacific	2022-05-26	Great horned owl	Non-host wild bird	Cluster 4	B4.1
USDA	22-018476-001	USA	Oregon	Pacific	2022-06-12	Canada goose	Waterfowl	Cluster 4	B4.1
USDA	22-018477-001	USA	Oregon	Pacific	2022-06-10	Canada goose	Waterfowl	Cluster 4	B4.1
USDA	22-018538-001	USA	Colorado	Central	2022-06-10	Goose	Waterfowl	Cluster 4	B2.2
USDA	22-018552-001	USA	Wisconsin	Mississippi	2022-04-30	Red-tailed hawk	Non-host wild bird	Cluster 1	B3.2
USDA	22-018576-001	USA	Pennsylvania	Atlantic	2022-06-10	Black Vulture	Non-host wild bird	Cluster 6	B1.1
USDA	22-018576-002	USA	Pennsylvania	Atlantic	2022-06-10	Black Vulture	Non-host wild bird	Cluster 6	B1.1
USDA	22-018576-003	USA	Pennsylvania	Atlantic	2022-06-10	Black Vulture	Non-host wild bird	Cluster 6	B1.1
USDA	22-018767-003	USA	Alaska	Pacific	Unknown	Mallard	Waterfowl	Cluster 4	B3.1
USDA	22-018806-001	USA	Michigan	Mississippi	2022-06-08	Double-crested Cormorant	Sea/shore bird	Cluster 6	B1.1
USDA	22-018806-002	USA	Michigan	Mississippi	2022-06-08	Bald eagle	Non-host wild bird	Cluster 5	B1.2
USDA	22-018806-003	USA	Michigan	Mississippi	2022-06-08	Bald eagle	Non-host wild bird	Cluster 5	B1.2
USDA	22-018806-004	USA	Michigan	Mississippi	2022-06-08	Bald eagle	Non-host wild bird	Cluster 5	B1.2
USDA	22-018806-005	USA	Michigan	Mississippi	2022-06-08	Bald eagle	Non-host wild bird	Cluster 5	B1.2
USDA	22-018839-001	USA	Pennsylvania	Atlantic	2022-06-07	Black Vulture	Non-host wild bird	Cluster 6	B1.1
USDA	22-018840-001	USA	Pennsylvania	Atlantic	2022-06-14	Red-tailed hawk	Non-host wild bird	Cluster 6	B1.1
USDA	22-018919-001	USA	New York	Atlantic	2022-06-14	Turkey Vulture	Non-host wild bird	Cluster 6	B1.1
USDA	22-018929-001	USA	Florida	Atlantic	2022-06-11	Black Vulture	Non-host wild bird	Cluster 6	B1.1
USDA	22-018930-001	USA	Florida	Atlantic	2022-06-14	American wood stork	Non-host wild bird	Cluster 5	B1.2
USDA	22-018980-001	USA	Idaho	Pacific	2022-06-04	Canada goose	Waterfowl	Cluster 1	B3.2
USDA	22-018986-002	USA	Indiana	Mississippi	2022-06-14	Canada goose	Waterfowl	Cluster 6	B1.1
USDA	22-019074-001	USA	Minnesota	Mississippi	2022-06-17	Bald eagle	Non-host wild bird	Cluster 1	B3.2
USDA	22-019204-001	USA	Wisconsin	Mississippi	2022-05-23	Bald eagle	Non-host wild bird	Cluster 3	A1
USDA	22-019205-001	USA	Michigan	Mississippi	2022-06-14	Double-crested Cormorant	Sea/shore bird	Cluster 6	B1.1
USDA	22-019205-002	USA	Michigan	Mississippi	2022-06-14	Bald eagle	Non-host wild bird	Cluster 6	B1.1
USDA	22-019205-005	USA	Michigan	Mississippi	2022-06-14	Bald eagle	Non-host wild bird	Cluster 6	B1.1
USDA	22-019205-006	USA	Michigan	Mississippi	2022-06-14	Bald eagle	Non-host wild bird	Cluster 6	B1.1
USDA	22-019205-007	USA	Michigan	Mississippi	2022-06-14	Wood Duck	Waterfowl	Cluster 2	B2.1
USDA	22-019205-008	USA	Michigan	Mississippi	2022-06-14	Great horned owl	Non-host wild bird	Cluster 6	B1.1
USDA	22-019255-001	USA	Washington	Pacific	2022-06-10	Red-tailed hawk	Non-host wild bird	Cluster 4	B4.1
USDA	22-019255-002	USA	Washington	Pacific	2022-06-10	Red-tailed hawk	Non-host wild bird	Cluster 4	B4.1
USDA	22-019255-003	USA	Washington	Pacific	2022-06-10	Red-tailed hawk	Non-host wild bird	Cluster 4	B4.1
USDA	22-019260-001	USA	Alaska	Pacific	2022-06-14	Short-billed Gull	Sea/shore bird	Cluster 4	B4.1
USDA	22-019268-001	USA	Alaska	Pacific	2022-06-14	Sandhill crane	Non-host wild bird	Cluster 1	B3.2
USDA	22-019312-001	USA	Wisconsin	Mississippi	2022-06-01	Double-crested Cormorant	Sea/shore bird	Cluster 6	B1.1
USDA	22-019312-002	USA	Wisconsin	Mississippi	2022-06-01	Double-crested Cormorant	Sea/shore bird	Cluster 6	B1.1
USDA	22-019519-001	USA	Georgia	Atlantic	Unknown	Black Vulture	Non-host wild bird	Cluster 6	B1.1
USDA	22-019521-001	USA	Massachusetts	Atlantic	2022-06-13	Common eider	Waterfowl	Cluster 3	A2
USDA	22-019521-002	USA	Massachusetts	Atlantic	2022-06-13	Common eider	Waterfowl	Cluster 3	A2
USDA	22-019521-003	USA	Massachusetts	Atlantic	2022-06-13	Common eider	Waterfowl	Cluster 3	A2
USDA	22-019521-004	USA	Massachusetts	Atlantic	2022-06-13	Common eider	Waterfowl	Cluster 3	A2
USDA	22-019521-005	USA	Massachusetts	Atlantic	2022-06-13	Common eider	Waterfowl	Cluster 3	A2
USDA	22-019713-001	USA	Florida	Atlantic	2022-06-19	Black Vulture	Non-host wild bird	Cluster 6	B1.1
USDA	22-019716-001	USA	Florida	Atlantic	2022-06-18	Black Vulture	Non-host wild bird	Cluster 6	B1.1
USDA	22-019846-002	USA	Indiana	Mississippi	2022-06-23	Eastern screech Owl	Non-host wild bird	Cluster 2	B2.1
USDA	22-019881-001	USA	Florida	Atlantic	2022-06-22	Great horned owl	Non-host wild bird	Cluster 6	B1.1
USDA	22-019885-001	USA	Florida	Atlantic	2022-06-14	Great horned owl	Non-host wild bird	Cluster 6	B1.1
USDA	22-019885-002	USA	Florida	Atlantic	2022-06-11	Great horned owl	Non-host wild bird	Cluster 6	B1.1
USDA	22-019898-001	USA	Washington	Pacific	2022-06-15	Bald eagle	Non-host wild bird	Cluster 4	B4.1
USDA	22-019901-001	USA	Oregon	Pacific	2022-06-23	Canada goose	Waterfowl	Cluster 2	B2.1
USDA	22-019920-001	USA	New York	Atlantic	2022-06-21	Turkey Vulture	Non-host wild bird	Cluster 5	B1.2
USDA	22-019921-001	USA	New York	Atlantic	2022-06-21	Turkey Vulture	Non-host wild bird	Cluster 5	B1.2
USDA	22-019922-001	USA	New York	Atlantic	2022-06-21	Turkey Vulture	Non-host wild bird	Cluster 5	B1.2
USDA	22-019942-001	USA	North Dakota	Central	2022-06-16	Eared grebe	Waterfowl	Cluster 4	B3.1
USDA	22-019942-002	USA	North Dakota	Central	2022-06-16	Eared grebe	Waterfowl	Cluster 4	B3.1
USDA	22-019946-001	USA	Wisconsin	Mississippi	2022-04-14	Fisher	Mammal	Cluster 1	Unassigned
USDA	22-020357-001	USA	Rhode Island	Atlantic	2022-06-23	Great black-backed Gull	Sea/shore bird	Cluster 3	A2
USDA	22-020378-001	USA	Florida	Atlantic	2022-06-23	Black Vulture	Non-host wild bird	Cluster 6	B1.1
USDA	22-020379-002	USA	Utah	Pacific	Unknown	Goose	Waterfowl	Cluster 1	B3.2
USDA	22-020386-001	USA	Florida	Atlantic	2022-06-28	Black Vulture	Non-host wild bird	Cluster 6	B1.1
USDA	22-020388-001	USA	Florida	Atlantic	2022-06-26	Black Vulture	Non-host wild bird	Cluster 6	B1.1
USDA	22-020388-002	USA	Florida	Atlantic	2022-06-26	Black Vulture	Non-host wild bird	Cluster 6	B1.1
USDA	22-020388-003	USA	Florida	Atlantic	2022-06-26	Black Vulture	Non-host wild bird	Cluster 6	B1.1
USDA	22-020416-001	USA	Massachusetts	Atlantic	2022-06-10	Bald eagle	Non-host wild bird	Cluster 3	A2
USDA	22-020416-003	USA	Massachusetts	Atlantic	2022-06-10	Common eider	Waterfowl	Cluster 3	A2
USDA	22-020416-004	USA	Massachusetts	Atlantic	2022-06-10	Peregrine falcon	Non-host wild bird	Cluster 3	A2
USDA	22-020416-005	USA	Massachusetts	Atlantic	2022-06-10	Great black-backed Gull	Sea/shore bird	Cluster 3	A2
USDA	22-020416-006	USA	Massachusetts	Atlantic	2022-06-10	Common eider	Waterfowl	Cluster 3	A2
USDA	22-020416-007	USA	Massachusetts	Atlantic	2022-06-10	Common eider	Waterfowl	Cluster 3	A2
USDA	22-020416-008	USA	Massachusetts	Atlantic	2022-06-10	Common eider	Waterfowl	Cluster 3	A2
USDA	22-020416-009	USA	Massachusetts	Atlantic	2022-06-10	Common eider	Waterfowl	Cluster 3	A2
USDA	22-020416-010	USA	Massachusetts	Atlantic	2022-06-10	Herring Gull	Sea/shore bird	Cluster 3	A2
USDA	22-020416-011	USA	Massachusetts	Atlantic	2022-06-10	Common eider	Waterfowl	Cluster 3	A2
USDA	22-020416-012	USA	Massachusetts	Atlantic	2022-06-10	Red-tailed hawk	Non-host wild bird	Cluster 3	A2
USDA	22-020416-013	USA	Massachusetts	Atlantic	2022-06-10	Red-tailed hawk	Non-host wild bird	Cluster 3	A2
USDA	22-020416-014	USA	Massachusetts	Atlantic	2022-06-10	Peregrine falcon	Non-host wild bird	Cluster 3	A2
USDA	22-020416-015	USA	Massachusetts	Atlantic	2022-06-10	Common eider	Waterfowl	Cluster 3	A2
USDA	22-020416-016	USA	Massachusetts	Atlantic	2022-06-10	Great black-backed Gull	Sea/shore bird	Cluster 3	A2
USDA	22-020416-017	USA	Maine	Atlantic	2022-06-10	Common tern	Sea/shore bird	Cluster 3	A2
USDA	22-020416-018	USA	Maine	Atlantic	2022-06-10	Common tern	Sea/shore bird	Cluster 3	A2
USDA	22-020416-019	USA	Maine	Atlantic	2022-06-10	Common tern	Sea/shore bird	Cluster 3	A2
USDA	22-020416-020	USA	Maine	Atlantic	2022-06-10	Common tern	Sea/shore bird	Cluster 3	A2
USDA	22-020416-022	USA	Maine	Atlantic	2022-06-10	Great black-backed Gull	Sea/shore bird	Cluster 3	A2
USDA	22-020416-023	USA	Maine	Atlantic	2022-06-10	Common eider	Waterfowl	Cluster 3	A2
USDA	22-020610-001	USA	Oregon	Pacific	2022-06-27	Great blue heron	Sea/shore bird	Cluster 4	B4.1
USDA	22-020652-001	USA	New Hampshire	Atlantic	2022-06-29	Herring Gull	Sea/shore bird	Cluster 3	A2
USDA	22-020656-001	USA	New Hampshire	Atlantic	2022-06-29	Great black-backed Gull	Sea/shore bird	Cluster 3	A2
USDA	22-020657-001	USA	New Hampshire	Atlantic	2022-06-29	Ring-billed gull	Sea/shore bird	Cluster 3	A2
USDA	22-020657-002	USA	New Hampshire	Atlantic	2022-06-29	Great black-backed Gull	Sea/shore bird	Cluster 3	A2
USDA	22-020657-003	USA	New Hampshire	Atlantic	2022-06-29	Common eider	Waterfowl	Cluster 3	A2
USDA	22-020792-002	USA	Alaska	Pacific	2022-06-13	Red Fox	Mammal	Cluster 1	B3.2
USDA	22-020794-001	USA	Maryland	Atlantic	2022-04-19	Black Vulture	Non-host wild bird	Cluster 6	B1.1
USDA	22-020830-001	USA	Georgia	Atlantic	2022-06-30	Black Vulture	Non-host wild bird	Cluster 6	B1.1
USDA	22-020831-001	USA	Maine	Atlantic	Unknown	Common tern	Sea/shore bird	Cluster 3	A2
USDA	22-020831-002	USA	Maine	Atlantic	Unknown	Common tern	Sea/shore bird	Cluster 3	A2
USDA	22-020831-004	USA	Maine	Atlantic	Unknown	Common tern	Sea/shore bird	Cluster 3	A2
USDA	22-020919-001	USA	Michigan	Mississippi	2022-06-30	Bald eagle	Non-host wild bird	Cluster 2	B2.1
USDA	22-020919-002	USA	Michigan	Mississippi	2022-06-30	Red-tailed hawk	Non-host wild bird	Cluster 6	B1.1
USDA	22-020946-001	USA	Utah	Pacific	2022-07-05	Swainson's Hawk	Non-host wild bird	Cluster 2	B2.1
USDA	22-020951-001	USA	Alaska	Pacific	2022-06-26	Raven	Non-host wild bird	Cluster 1	B3.2
USDA	22-020951-002	USA	Alaska	Pacific	2022-06-26	Raven	Non-host wild bird	Cluster 1	B3.2
USDA	22-020952-001	USA	Alaska	Pacific	2022-07-22	Parasitic jaeger	Non-host wild bird	Cluster 1	B3.2
USDA	22-020952-002	USA	Alaska	Pacific	2022-07-22	Arctic tern	Sea/shore bird	Cluster 1	B3.2
USDA	22-021001-001	USA	Florida	Atlantic	2022-07-03	Black Vulture	Non-host wild bird	Cluster 6	B1.1
USDA	22-021007-002	USA	Florida	Atlantic	2022-07-04	Black Vulture	Non-host wild bird	Cluster 6	B1.1
USDA	22-021011-002	USA	Florida	Atlantic	2022-07-05	Black Vulture	Non-host wild bird	Cluster 6	B1.1
USDA	22-021012-002	USA	Florida	Atlantic	2022-07-02	Black Vulture	Non-host wild bird	Cluster 6	B1.1
USDA	22-021012-003	USA	Florida	Atlantic	2022-07-02	Black Vulture	Non-host wild bird	Cluster 6	B1.1
USDA	22-021013-003	USA	Florida	Atlantic	2022-07-01	Black Vulture	Non-host wild bird	Cluster 6	B1.1
USDA	22-021013-004	USA	Florida	Atlantic	2022-07-01	Black Vulture	Non-host wild bird	Cluster 6	B1.1
USDA	22-021035-001	USA	Massachusetts	Atlantic	2022-06-22	Bald eagle	Non-host wild bird	Cluster 3	A2
USDA	22-021070-001	USA	Oregon	Pacific	2022-07-01	Canada goose	Waterfowl	Cluster 4	B4.1
USDA	22-021071-001	USA	Oregon	Pacific	2022-07-05	Canada goose	Waterfowl	Cluster 4	B4.1
USDA	22-021121-001	USA	Minnesota	Mississippi	2022-07-07	Peregrine falcon	Non-host wild bird	Cluster 3	A1
USDA	22-021192-001	USA	Oregon	Pacific	2022-07-06	Red-tailed hawk	Non-host wild bird	Cluster 4	B4.1
USDA	22-021219-001	USA	Florida	Atlantic	2022-07-07	Black Vulture	Non-host wild bird	Cluster 6	B1.1
USDA	22-021273-001	USA	California	Pacific	2022-07-05	Canada goose	Waterfowl	Cluster 4	B4.1
USDA	22-021273-002	USA	California	Pacific	2022-07-05	Canada goose	Waterfowl	Cluster 4	B4.1
USDA	22-021273-003	USA	California	Pacific	2022-07-05	American white Pelican	Sea/shore bird	Cluster 4	B4.1
USDA	22-021276-001	USA	Illinois	Mississippi	2022-07-01	American white Pelican	Sea/shore bird	Cluster 1	B3.2
USDA	22-021277-001	USA	Iowa	Mississippi	2022-07-01	American white Pelican	Sea/shore bird	Cluster 1	B3.2
USDA	22-021282-001	USA	Pennsylvania	Atlantic	2022-07-08	Black Vulture	Non-host wild bird	Cluster 6	B1.1
USDA	22-021282-003	USA	Pennsylvania	Atlantic	2022-07-08	Black Vulture	Non-host wild bird	Cluster 6	B1.1
USDA	22-021498-001	USA	Montana	Pacific	2022-07-06	Bald eagle	Non-host wild bird	Cluster 2	B2.1
USDA	22-021645-001	USA	Pennsylvania	Atlantic	2022-04-20	Great horned owl	Non-host wild bird	Cluster 6	B1.1
USDA	22-021647-001	USA	Pennsylvania	Atlantic	2022-04-27	Bald eagle	Non-host wild bird	Cluster 5	B1.2
USDA	22-021648-001	USA	Pennsylvania	Atlantic	2022-04-27	Red-tailed hawk	Non-host wild bird	Cluster 5	B1.2
USDA	22-021649-001	USA	Pennsylvania	Atlantic	2022-04-27	Bald eagle	Non-host wild bird	Cluster 5	B1.2
USDA	22-021652-001	USA	Pennsylvania	Atlantic	2022-05-02	Great horned owl	Non-host wild bird	Cluster 3	A1
USDA	22-021654-001	USA	Pennsylvania	Atlantic	2022-05-11	Bald eagle	Non-host wild bird	Cluster 3	A1
USDA	22-021657-001	USA	Pennsylvania	Atlantic	2022-05-10	Wood Duck	Waterfowl	Cluster 6	B1.1
USDA	22-021725-001	USA	New Jersey	Atlantic	2022-06-13	Black Vulture	Non-host wild bird	Cluster 6	B1.1
USDA	22-021792-002	USA	Florida	Atlantic	2022-07-10	Black Vulture	Non-host wild bird	Cluster 6	B1.1
USDA	22-021793-001	USA	Florida	Atlantic	2022-07-08	Black Vulture	Non-host wild bird	Cluster 6	B1.1
USDA	22-021793-002	USA	Florida	Atlantic	2022-07-08	Black Vulture	Non-host wild bird	Cluster 6	B1.1
USDA	22-021852-001	USA	Virginia	Atlantic	Unknown	Black Vulture	Non-host wild bird	Cluster 6	B1.1
USDA	22-021852-002	USA	Virginia	Atlantic	Unknown	Black Vulture	Non-host wild bird	Cluster 6	B1.1
USDA	22-021852-003	USA	Virginia	Atlantic	Unknown	Black Vulture	Non-host wild bird	Cluster 6	B1.1
USDA	22-021855-001	USA	Alaska	Pacific	2022-05-31	Glaucous Gull	Sea/shore bird	Cluster 1	B3.2
USDA	22-021856-001	USA	Alaska	Pacific	2022-07-08	Raven	Non-host wild bird	Cluster 1	B3.2
USDA	22-021893-001	USA	Utah	Pacific	2022-07-12	Swainson's Hawk	Non-host wild bird	Cluster 2	B2.1
USDA	22-021896-001	USA	New York	Atlantic	2022-07-13	Bald eagle	Non-host wild bird	Cluster 2	B2.1
USDA	22-022036-001	USA	Oregon	Pacific	2022-07-11	Canada goose	Waterfowl	Cluster 4	B4.1
USDA	22-022114-001	USA	Iowa	Mississippi	2022-07-01	American white Pelican	Sea/shore bird	Cluster 1	B3.2
USDA	22-022116-001	USA	Florida	Atlantic	2022-07-12	Black Vulture	Non-host wild bird	Cluster 6	B1.1
USDA	22-022116-002	USA	Florida	Atlantic	2022-07-12	Black Vulture	Non-host wild bird	Cluster 6	B1.1
USDA	22-022155-001	USA	California	Pacific	2022-07-14	Canada goose	Waterfowl	Cluster 4	B4.1
USDA	22-022155-002	USA	California	Pacific	2022-07-14	Canada goose	Waterfowl	Cluster 4	B4.1
USDA	22-022191-001	USA	Oregon	Pacific	2022-07-08	Canada goose	Waterfowl	Cluster 4	B4.1
USDA	22-022234-001	USA	Maine	Atlantic	Unknown	Common eider	Waterfowl	Cluster 3	A2
USDA	22-022236-001	USA	Maine	Atlantic	Unknown	Common eider	Waterfowl	Cluster 3	A2
USDA	22-022584-001	USA	Florida	Atlantic	2022-07-14	Black Vulture	Non-host wild bird	Cluster 6	B1.1
USDA	22-022585-001	USA	Florida	Atlantic	2022-07-17	Black Vulture	Non-host wild bird	Cluster 6	B1.1
USDA	22-022586-001	USA	Florida	Atlantic	2022-07-15	Black Vulture	Non-host wild bird	Cluster 6	B1.1
USDA	22-022586-002	USA	Florida	Atlantic	2022-07-15	Black Vulture	Non-host wild bird	Cluster 6	B1.1
USDA	22-022587-001	USA	Florida	Atlantic	2022-07-20	Black Vulture	Non-host wild bird	Cluster 6	B1.1
USDA	22-022596-001	USA	New York	Atlantic	2022-07-07	Caspian tern	Sea/shore bird	Cluster 2	B2.1
USDA	22-022596-002	USA	New York	Atlantic	2022-07-07	Herring Gull	Sea/shore bird	Cluster 2	B2.1
USDA	22-022782-001	USA	Oregon	Pacific	2022-07-14	Great horned owl	Non-host wild bird	Cluster 4	B4.1
USDA	22-022807-001	USA	Alaska	Pacific	2022-07-19	Snowy owl	Non-host wild bird	Cluster 1	B3.2
USDA	22-022940-001	USA	California	Pacific	2022-07-20	Canada goose	Waterfowl	Cluster 4	B4.1
USDA	22-022940-002	USA	California	Pacific	2022-07-20	Canada goose	Waterfowl	Cluster 4	B4.1
USDA	22-022940-003	USA	California	Pacific	2022-07-20	Canada goose	Waterfowl	Cluster 4	B4.1
USDA	22-022941-001	USA	California	Pacific	2022-07-19	American white Pelican	Sea/shore bird	Cluster 4	B4.1
USDA	22-022942-001	USA	California	Pacific	2022-07-19	American white Pelican	Sea/shore bird	Cluster 4	B4.1
USDA	22-022964-001	USA	Oregon	Pacific	2022-07-22	Bald eagle	Non-host wild bird	Cluster 4	B4.1
USDA	22-023057-001	USA	California	Pacific	2022-07-25	Canada goose	Waterfowl	Cluster 4	B4.1
USDA	22-023060-003	USA	California	Pacific	2022-07-26	Mute Swan	Waterfowl	Cluster 4	B4.1
USDA	22-023107-001	USA	Florida	Atlantic	2022-04-04	Crested caracara	Non-host wild bird	Cluster 6	B1.1
USDA	22-023116-001	USA	Minnesota	Mississippi	2022-07-19	American white Pelican	Sea/shore bird	Cluster 1	B3.2
USDA	22-023280-001	USA	Florida	Atlantic	2022-07-21	Black Vulture	Non-host wild bird	Cluster 6	B1.1
USDA	22-023282-001	USA	Florida	Atlantic	2022-07-25	Black Vulture	Non-host wild bird	Cluster 6	B1.1
USDA	22-023550-001	USA	Nevada	Pacific	2022-07-22	Great horned owl	Non-host wild bird	Cluster 2	B2.1
USDA	22-023551-001	USA	Washington	Pacific	2022-07-25	Turkey Vulture	Non-host wild bird	Cluster 4	B4.1
USDA	22-023552-001	USA	Alaska	Pacific	2022-04-27	Bald eagle	Non-host wild bird	Cluster 4	B4.1
USDA	22-023553-001	USA	Alaska	Pacific	Unknown	Glaucous Gull	Sea/shore bird	Cluster 1	B3.2
USDA	22-023553-002	USA	Alaska	Pacific	Unknown	Black brant	Waterfowl	Cluster 1	B3.2
USDA	22-023553-003	USA	Alaska	Pacific	Unknown	Glaucous Gull	Sea/shore bird	Cluster 3	A3
USDA	22-023557-001	USA	Alaska	Pacific	2022-06-30	Parasitic jaeger	Non-host wild bird	Cluster 4	B4.1
USDA	22-023567-001	USA	Florida	Atlantic	2022-07-26	Black Vulture	Non-host wild bird	Cluster 6	B1.1
USDA	22-023567-002	USA	Florida	Atlantic	2022-07-26	Black Vulture	Non-host wild bird	Cluster 6	B1.1
USDA	22-023567-003	USA	Florida	Atlantic	2022-07-26	Black Vulture	Non-host wild bird	Cluster 6	B1.1
USDA	22-023791-001	USA	California	Pacific	2022-07-27	American white Pelican	Sea/shore bird	Cluster 4	B4.1
USDA	22-023858-001	USA	California	Pacific	2022-08-01	Canada goose	Waterfowl	Cluster 4	B4.1
USDA	22-023859-001	USA	California	Pacific	2022-08-01	American white Pelican	Sea/shore bird	Cluster 4	B4.1
USDA	22-023860-001	USA	California	Pacific	2022-07-29	Canada goose	Waterfowl	Cluster 4	B4.1
USDA	22-023894-001	USA	Oregon	Pacific	2022-07-27	American wigeon	Waterfowl	Cluster 4	B4.1
USDA	22-023975-001	USA	California	Pacific	2022-07-14	Canada goose	Waterfowl	Cluster 4	B4.1
USDA	22-023993-001	USA	Utah	Pacific	2022-08-02	Gull	Sea/shore bird	Cluster 4	B2.2
USDA	22-024092-001	USA	Florida	Atlantic	2022-07-31	Black Vulture	Non-host wild bird	Cluster 6	B1.1
USDA	22-024181-001	USA	California	Pacific	2022-08-03	Turkey Vulture	Non-host wild bird	Cluster 4	B4.1
USDA	22-024181-002	USA	California	Pacific	2022-08-03	Turkey Vulture	Non-host wild bird	Cluster 4	B4.1
USDA	22-024181-003	USA	California	Pacific	2022-08-03	Turkey Vulture	Non-host wild bird	Cluster 4	B4.1
USDA	22-024217-002	USA	New Jersey	Atlantic	2022-08-02	Black Vulture	Non-host wild bird	Cluster 6	B1.1
USDA	22-024217-003	USA	New Jersey	Atlantic	2022-08-02	Black Vulture	Non-host wild bird	Cluster 6	B1.1
USDA	22-024217-004	USA	New Jersey	Atlantic	2022-08-02	Black Vulture	Non-host wild bird	Cluster 6	B1.1
USDA	22-024217-005	USA	New Jersey	Atlantic	2022-08-02	Black Vulture	Non-host wild bird	Cluster 6	B1.1
USDA	22-024341-002	USA	Florida	Atlantic	2022-08-04	Black Vulture	Non-host wild bird	Cluster 6	B1.1
USDA	22-024341-003	USA	Florida	Atlantic	2022-08-05	Black Vulture	Non-host wild bird	Cluster 6	B1.1
USDA	22-024349-001	USA	Florida	Atlantic	2022-08-04	Black Vulture	Non-host wild bird	Cluster 6	B1.1
USDA	22-024350-001	USA	Florida	Atlantic	2022-08-05	Black Vulture	Non-host wild bird	Cluster 6	B1.1
USDA	22-024351-001	USA	Florida	Atlantic	2022-08-03	Black Vulture	Non-host wild bird	Cluster 6	B1.1
USDA	22-024352-001	USA	Florida	Atlantic	2022-08-04	Black Vulture	Non-host wild bird	Cluster 6	B1.1
USDA	22-024353-001	USA	Florida	Atlantic	2022-07-31	Black Vulture	Non-host wild bird	Cluster 6	B1.1
USDA	22-024354-001	USA	Florida	Atlantic	2022-08-02	Black Vulture	Non-host wild bird	Cluster 6	B1.1
USDA	22-024354-002	USA	Florida	Atlantic	2022-08-02	Black Vulture	Non-host wild bird	Cluster 6	B1.1
USDA	22-024355-002	USA	Florida	Atlantic	2022-07-30	Black Vulture	Non-host wild bird	Cluster 6	B1.1
USDA	22-024355-003	USA	Florida	Atlantic	2022-07-30	Black Vulture	Non-host wild bird	Cluster 6	B1.1
USDA	22-024355-004	USA	Florida	Atlantic	2022-07-30	Black Vulture	Non-host wild bird	Cluster 6	B1.1
USDA	22-024356-001	USA	Florida	Atlantic	2022-07-28	Black Vulture	Non-host wild bird	Cluster 6	B1.1
USDA	22-024356-002	USA	Florida	Atlantic	2022-07-28	Black Vulture	Non-host wild bird	Cluster 6	B1.1
USDA	22-024357-001	USA	Florida	Atlantic	2022-08-01	Black Vulture	Non-host wild bird	Cluster 6	B1.1
USDA	22-024491-001	USA	Washington	Pacific	2022-07-30	Bald eagle	Non-host wild bird	Cluster 4	B4.1
USDA	22-024499-001	USA	Washington	Pacific	2022-07-29	Bald eagle	Non-host wild bird	Cluster 4	B4.1
USDA	22-024502-001	USA	Alaska	Pacific	2022-07-01	Glaucous Gull	Sea/shore bird	Cluster 1	B3.2
USDA	22-024503-001	USA	Washington	Pacific	2022-07-27	Caspian tern	Sea/shore bird	Cluster 4	B4.1
USDA	22-024503-002	USA	Washington	Pacific	2022-07-27	Caspian tern	Sea/shore bird	Cluster 4	B4.1
USDA	22-024599-001	USA	California	Pacific	2022-08-05	Wood Duck	Waterfowl	Cluster 4	B4.1
USDA	22-024600-001	USA	California	Pacific	2022-08-05	Canada goose	Waterfowl	Cluster 4	B4.1
USDA	22-024601-001	USA	California	Pacific	2022-08-08	Canada goose	Waterfowl	Cluster 4	B4.1
USDA	22-024601-002	USA	California	Pacific	2022-08-08	Canada goose	Waterfowl	Cluster 4	B4.1
USDA	22-024602-001	USA	California	Pacific	2022-08-08	Muscovy Duck	Waterfowl	Cluster 4	B4.1
USDA	22-024700-001	USA	Maine	Atlantic	2022-07-10	Peregrine falcon	Non-host wild bird	Cluster 3	A2
USDA	22-024871-001	USA	Tennessee	Mississippi	U/1/2022	Mallard	Waterfowl	Cluster 3	A1
USDA	22-024871-002	USA	Tennessee	Mississippi	U/1/2022	Mallard	Waterfowl	Cluster 3	A1
USDA	22-024871-003	USA	Tennessee	Mississippi	U/1/2022	Mallard	Waterfowl	Cluster 3	A1
USDA	22-024871-004	USA	Tennessee	Mississippi	U/1/2022	Mallard	Waterfowl	Cluster 3	A1
USDA	22-024871-005	USA	Tennessee	Mississippi	U/1/2022	Mallard	Waterfowl	Cluster 3	A1
USDA	22-024871-006	USA	Tennessee	Mississippi	U/1/2022	Mallard	Waterfowl	Cluster 3	A1
USDA	22-024871-007	USA	Tennessee	Mississippi	U/1/2022	Mallard	Waterfowl	Cluster 3	A1
USDA	22-024871-009	USA	Tennessee	Mississippi	U/1/2022	Mallard	Waterfowl	Cluster 3	A1
USDA	22-024871-010	USA	Tennessee	Mississippi	U/1/2022	Gadwall	Waterfowl	Cluster 3	A1
USDA	22-024871-011	USA	Tennessee	Mississippi	U/1/2022	Gadwall	Waterfowl	Cluster 3	A1
USDA	22-024871-012	USA	Tennessee	Mississippi	U/1/2022	Gadwall	Waterfowl	Cluster 3	A1
USDA	22-024871-013	USA	Tennessee	Mississippi	U/1/2022	American wigeon	Waterfowl	Cluster 3	A1
USDA	22-024871-014	USA	Tennessee	Mississippi	U/1/2022	American wigeon	Waterfowl	Cluster 3	A1
USDA	22-024871-015	USA	Tennessee	Mississippi	U/1/2022	Gadwall	Waterfowl	Cluster 3	A1
USDA	22-024871-016	USA	Tennessee	Mississippi	U/1/2022	American wigeon	Waterfowl	Cluster 3	A1
USDA	22-024871-017	USA	Tennessee	Mississippi	U/1/2022	Mallard	Waterfowl	Cluster 3	A1
USDA	22-024871-019	USA	Tennessee	Mississippi	U/1/2022	Mallard	Waterfowl	Cluster 3	A1
USDA	22-024949-001	USA	California	Pacific	2022-08-09	Canada goose	Waterfowl	Cluster 4	B4.1
USDA	22-024975-001	USA	Michigan	Mississippi	2022-08-05	Mallard	Waterfowl	Cluster 5	B1.3
USDA	22-024975-002	USA	Michigan	Mississippi	2022-08-05	Mallard	Waterfowl	Cluster 5	B1.3
USDA	22-024975-003	USA	Michigan	Mississippi	2022-08-05	Mallard	Waterfowl	Cluster 5	B1.3
USDA	22-025048-001	USA	Florida	Atlantic	2022-08-09	Black Vulture	Non-host wild bird	Cluster 6	B1.1
USDA	22-025057-001	USA	Florida	Atlantic	2022-08-08	Black Vulture	Non-host wild bird	Cluster 6	B1.1
USDA	22-025058-001	USA	Florida	Atlantic	2022-08-06	Mallard	Waterfowl	Cluster 6	B1.1
USDA	22-025059-001	USA	Florida	Atlantic	2022-08-08	Black Vulture	Non-host wild bird	Cluster 6	B1.1
USDA	22-025061-001	USA	Florida	Atlantic	2022-08-10	Black Vulture	Non-host wild bird	Cluster 6	B1.1
USDA	22-025062-001	USA	Florida	Atlantic	2022-08-09	Black Vulture	Non-host wild bird	Cluster 6	B1.1
USDA	22-025064-001	USA	Florida	Atlantic	2022-08-08	Black Vulture	Non-host wild bird	Cluster 6	B1.1
USDA	22-025065-001	USA	Florida	Atlantic	2022-08-08	Black Vulture	Non-host wild bird	Cluster 6	B1.1
USDA	22-025066-001	USA	Florida	Atlantic	2022-08-08	Black Vulture	Non-host wild bird	Cluster 6	B1.1
USDA	22-025067-001	USA	Florida	Atlantic	2022-08-08	Black Vulture	Non-host wild bird	Cluster 6	B1.1
USDA	22-025070-001	USA	Maine	Atlantic	2022-07-20	Canada goose	Waterfowl	Cluster 3	A2
USDA	22-025129-001	USA	Utah	Pacific	2022-08-11	Canada goose	Waterfowl	Cluster 1	B3.2
USDA	22-025261-001	USA	California	Pacific	2022-08-08	Mallard	Waterfowl	Cluster 2	B2.1
USDA	22-025261-002	USA	California	Pacific	2022-08-08	Mallard	Waterfowl	Cluster 2	B2.1
USDA	22-025261-003	USA	California	Pacific	2022-08-08	Mallard	Waterfowl	Cluster 2	B2.1
USDA	22-025261-005	USA	California	Pacific	2022-08-08	Mallard	Waterfowl	Cluster 2	B2.1
USDA	22-025261-006	USA	California	Pacific	2022-08-08	Mallard	Waterfowl	Cluster 2	B2.1
USDA	22-025261-008	USA	California	Pacific	2022-08-08	Mallard	Waterfowl	Cluster 2	B2.1
USDA	22-025277-001	USA	Oregon	Pacific	2022-08-11	American white Pelican	Sea/shore bird	Cluster 4	B4.1
USDA	22-025278-001	USA	Oregon	Pacific	2022-08-08	American white Pelican	Sea/shore bird	Cluster 4	B4.1
USDA	22-025279-001	USA	Oregon	Pacific	2022-07-09	Canada goose	Waterfowl	Cluster 4	B4.1
USDA	22-025281-001	USA	Oregon	Pacific	2022-07-30	Red-tailed hawk	Non-host wild bird	Cluster 4	B4.1
USDA	22-025283-001	USA	Oregon	Pacific	2022-08-01	Canada goose	Waterfowl	Cluster 4	B4.1
USDA	22-025284-001	USA	Oregon	Pacific	2022-08-03	Canada goose	Waterfowl	Cluster 4	B4.1
USDA	22-025285-001	USA	Oregon	Pacific	2022-08-04	American white Pelican	Sea/shore bird	Cluster 4	B4.1
USDA	22-025285-002	USA	Oregon	Pacific	2022-08-04	Canada goose	Waterfowl	Cluster 4	B4.1
USDA	22-025285-003	USA	Oregon	Pacific	2022-08-04	Mallard	Waterfowl	Cluster 4	B4.1
USDA	22-025499-001	USA	Alaska	Pacific	2022-08-09	Glaucous Gull	Sea/shore bird	Cluster 3	A3
USDA	22-025570-002	USA	Oregon	Pacific	2022-08-10	Mallard	Waterfowl	Cluster 4	B4.1
USDA	22-025570-006	USA	Oregon	Pacific	2022-08-10	Mallard	Waterfowl	Cluster 4	B4.1
USDA	22-025570-008	USA	Oregon	Pacific	2022-08-10	Duck	Domestic waterfowl	Cluster 4	B4.1
USDA	22-025634-001	USA	Pennsylvania	Atlantic	2022-08-15	Black Vulture	Non-host wild bird	Cluster 6	B1.1
USDA	22-025683-001	USA	South Carolina	Atlantic	2022-08-08	Black Vulture	Non-host wild bird	Cluster 6	B1.1
USDA	22-025683-002	USA	South Carolina	Atlantic	2022-08-08	Black Vulture	Non-host wild bird	Cluster 6	B1.1
USDA	22-025687-001	USA	Washington	Pacific	2022-05-06	Mallard	Waterfowl	Cluster 4	B4.1
USDA	22-025752-009	USA	Oregon	Pacific	2022-08-10	Mallard	Waterfowl	Cluster 4	B4.1
USDA	22-025788-001	USA	Alaska	Pacific	2022-07-31	Raven	Non-host wild bird	Cluster 3	A3
USDA	22-025931-001	USA	Utah	Pacific	2022-08-16	Goose	Waterfowl	Cluster 1	B3.2
USDA	22-025933-001	USA	California	Pacific	2022-08-16	Canada goose	Waterfowl	Cluster 4	B4.1
USDA	22-025934-001	USA	California	Pacific	2022-08-16	Canada goose	Waterfowl	Cluster 4	B4.1
USDA	22-026112-027	USA	Oregon	Pacific	2022-08-15	Mallard	Waterfowl	Cluster 4	B4.1
USDA	22-026112-030	USA	Oregon	Pacific	2022-08-15	Mallard	Waterfowl	Cluster 4	B4.1
USDA	22-026112-041	USA	Oregon	Pacific	2022-08-15	Mallard	Waterfowl	Cluster 4	B4.1
USDA	22-026112-045	USA	Oregon	Pacific	2022-08-15	Mallard	Waterfowl	Cluster 4	B4.1
USDA	22-026112-046	USA	Oregon	Pacific	2022-08-15	Mallard	Waterfowl	Cluster 4	B4.1
USDA	22-026118-001	USA	California	Pacific	2022-08-17	Red-tailed hawk	Non-host wild bird	Cluster 4	B4.1
USDA	22-026118-002	USA	California	Pacific	2022-08-17	Canada goose	Waterfowl	Cluster 4	B4.1
USDA	22-026129-002	USA	Michigan	Mississippi	2022-08-10	Caspian tern	Sea/shore bird	Cluster 3	A1
USDA	22-026130-001	USA	Wisconsin	Mississippi	2022-08-18	Bald eagle	Non-host wild bird	Cluster 5	B1.3
USDA	22-026137-045	USA	Alaska	Pacific	2022-08-09	Mallard	Waterfowl	Cluster 4	B4.1
USDA	22-026148-001	USA	Pennsylvania	Atlantic	2022-08-16	Sandhill crane	Non-host wild bird	Cluster 6	B1.1
USDA	22-026193-001	USA	Florida	Atlantic	2022-08-19	Black Vulture	Non-host wild bird	Cluster 6	B1.1
USDA	22-026328-002	USA	Georgia	Atlantic	Unknown	Vulture	Non-host wild bird	Cluster 6	B1.1
USDA	22-026557-001	USA	South Carolina	Atlantic	2022-08-12	Black Vulture	Non-host wild bird	Cluster 6	B1.1
USDA	22-026559-001	USA	Georgia	Atlantic	2022-08-15	Black Vulture	Non-host wild bird	Cluster 6	B1.1
USDA	22-026559-002	USA	Georgia	Atlantic	2022-08-15	Black Vulture	Non-host wild bird	Cluster 6	B1.1
USDA	22-026563-001	USA	Oregon	Pacific	2022-08-17	Canada goose	Waterfowl	Cluster 4	B4.1
USDA	22-026615-001	USA	California	Pacific	2022-08-23	Turkey Vulture	Non-host wild bird	Cluster 4	B4.1
USDA	22-026616-001	USA	California	Pacific	2022-08-23	Mallard	Waterfowl	Cluster 4	B4.1
USDA	22-026659-002	USA	Utah	Pacific	2022-08-22	Goose	Waterfowl	Cluster 4	B2.2
USDA	22-026660-001	USA	Utah	Pacific	2022-08-24	Great horned owl	Non-host wild bird	Cluster 1	B3.2
USDA	22-026660-002	USA	Utah	Pacific	2022-08-24	Canada goose	Waterfowl	Cluster 1	B3.2
USDA	22-026660-003	USA	Utah	Pacific	2022-08-24	Canada goose	Waterfowl	Cluster 4	B2.2
USDA	22-026660-005	USA	Utah	Pacific	2022-08-24	Eared grebe	Waterfowl	Cluster 1	B3.2
USDA	22-026726-001	USA	Florida	Atlantic	2022-08-14	Black Vulture	Non-host wild bird	Cluster 6	B1.1
USDA	22-026727-001	USA	Florida	Atlantic	2022-08-22	Black Vulture	Non-host wild bird	Cluster 6	B1.1
USDA	22-026731-001	USA	Minnesota	Mississippi	2022-08-19	American white Pelican	Sea/shore bird	Cluster 1	B3.2
USDA	22-026733-001	USA	Florida	Atlantic	2022-08-10	Black Vulture	Non-host wild bird	Cluster 6	B1.1
USDA	22-026733-002	USA	Florida	Atlantic	2022-08-10	Black Vulture	Non-host wild bird	Cluster 6	B1.1
USDA	22-026735-001	USA	Florida	Atlantic	2022-08-23	Black Vulture	Non-host wild bird	Cluster 6	B1.1
USDA	22-026892-001	USA	Montana	Pacific	2022-08-25	Canada goose	Waterfowl	Cluster 4	B4.1
USDA	22-026892-002	USA	Montana	Pacific	2022-08-25	Hawk	Non-host wild bird	Cluster 4	B4.1
USDA	22-026942-001	USA	Oregon	Pacific	2022-08-09	Great horned owl	Non-host wild bird	Cluster 4	B4.1
USDA	22-026960-001	USA	Michigan	Mississippi	Unknown	Bald eagle	Non-host wild bird	Cluster 5	B1.2
USDA	22-026960-002	USA	Michigan	Mississippi	Unknown	Canada goose	Waterfowl	Cluster 5	B1.3
USDA	22-026962-004	USA	Utah	Pacific	2022-08-17	Cinnamon Teal	Waterfowl	Cluster 2	B2.1
USDA	22-026962-005	USA	Utah	Pacific	2022-08-17	Mallard	Waterfowl	Cluster 4	B4.1
USDA	22-026962-031	USA	Utah	Pacific	2022-08-17	Duck	Domestic waterfowl	Cluster 4	B2.2
USDA	22-026962-034	USA	Utah	Pacific	2022-08-17	Gadwall	Waterfowl	Cluster 4	B2.2
USDA	22-026962-042	USA	Utah	Pacific	2022-08-17	Gadwall	Waterfowl	Cluster 4	B2.2
USDA	22-026962-083	USA	Utah	Pacific	2022-08-17	Mallard	Waterfowl	Cluster 4	B2.2
USDA	22-026969-001	USA	Minnesota	Mississippi	2022-08-29	Trumpeter Swan	Waterfowl	Cluster 1	B3.2
USDA	22-026969-002	USA	Minnesota	Mississippi	2022-08-29	Trumpeter Swan	Waterfowl	Cluster 1	B3.2
USDA	22-026975-001	USA	New York	Atlantic	2022-08-24	Black Vulture	Non-host wild bird	Cluster 6	B1.1
USDA	22-026980-001	USA	Virginia	Atlantic	2022-08-22	Black Vulture	Non-host wild bird	Cluster 6	B1.1
USDA	22-026980-002	USA	Virginia	Atlantic	2022-08-22	Black Vulture	Non-host wild bird	Cluster 6	B1.1
USDA	22-026980-003	USA	Virginia	Atlantic	2022-08-22	Black Vulture	Non-host wild bird	Cluster 6	B1.1
USDA	22-026980-004	USA	Virginia	Atlantic	2022-08-22	Black Vulture	Non-host wild bird	Cluster 6	B1.1
USDA	22-026980-006	USA	Virginia	Atlantic	2022-08-22	Black Vulture	Non-host wild bird	Cluster 6	B1.1
USDA	22-026980-007	USA	Virginia	Atlantic	2022-08-22	Black Vulture	Non-host wild bird	Cluster 6	B1.1
USDA	22-026981-001	USA	Georgia	Atlantic	2022-08-24	Black Vulture	Non-host wild bird	Cluster 6	B1.1
USDA	22-027017-007	USA	Utah	Pacific	2022-08-10	Cinnamon Teal	Waterfowl	Cluster 1	B3.2
USDA	22-027017-012	USA	Utah	Pacific	2022-08-10	American green-winged teal	Waterfowl	Cluster 1	B3.2
USDA	22-027017-024	USA	Utah	Pacific	2022-08-10	American green-winged teal	Waterfowl	Cluster 6	B1.1
USDA	22-027081-001	USA	Nevada	Pacific	2022-08-16	Mallard	Waterfowl	Cluster 2	B2.1
USDA	22-027081-002	USA	Nevada	Pacific	2022-08-19	Mallard	Waterfowl	Cluster 2	B2.1
USDA	22-027081-003	USA	Nevada	Pacific	2022-08-16	Mallard	Waterfowl	Cluster 2	B2.1
USDA	22-027081-004	USA	Nevada	Pacific	2022-08-22	Mallard	Waterfowl	Cluster 2	B2.1
USDA	22-027081-005	USA	Nevada	Pacific	2022-08-16	Canada goose	Waterfowl	Cluster 2	B2.1
USDA	22-027083-001	USA	Wisconsin	Mississippi	2022-08-25	American white Pelican	Sea/shore bird	Cluster 5	B1.3
USDA	22-027083-002	USA	Wisconsin	Mississippi	2022-08-25	American white Pelican	Sea/shore bird	Cluster 5	B1.3
USDA	22-027083-003	USA	Wisconsin	Mississippi	2022-08-25	Canada goose	Waterfowl	Cluster 5	B1.3
USDA	22-027083-004	USA	Wisconsin	Mississippi	2022-08-25	Ring-billed gull	Sea/shore bird	Cluster 5	B1.3
USDA	22-027083-005	USA	Wisconsin	Mississippi	2022-08-25	Canada goose	Waterfowl	Cluster 5	B1.3
USDA	22-027222-001	USA	Indiana	Mississippi	2022-08-26	Canada goose	Waterfowl	Cluster 5	B1.3
USDA	22-027231-001	USA	Nevada	Pacific	2022-08-08	Mallard	Waterfowl	Cluster 2	B2.1
USDA	22-027249-001	USA	Wisconsin	Mississippi	2022-08-29	Snowy owl	Non-host wild bird	Cluster 5	B1.3
USDA	22-027250-001	USA	Wisconsin	Mississippi	2022-08-29	Great horned owl	Non-host wild bird	Cluster 5	B1.3
USDA	22-027328-001	USA	Pennsylvania	Atlantic	2022-08-23	Black Vulture	Non-host wild bird	Cluster 6	B1.1
USDA	22-027406-001	USA	Iowa	Mississippi	2022-08-30	Canada goose	Waterfowl	Cluster 5	B1.2
USDA	22-027406-002	USA	Iowa	Mississippi	2022-08-30	Canada goose	Waterfowl	Cluster 5	B1.2
USDA	22-027416-001	USA	New York	Atlantic	2022-08-29	Black Vulture	Non-host wild bird	Cluster 6	B1.1
USDA	22-027417-001	USA	New York	Atlantic	2022-08-29	Black Vulture	Non-host wild bird	Cluster 6	B1.1
USDA	22-027418-001	USA	New York	Atlantic	2022-08-29	Black Vulture	Non-host wild bird	Cluster 6	B1.1
USDA	22-027419-001	USA	New York	Atlantic	2022-08-29	Black Vulture	Non-host wild bird	Cluster 6	B1.1
USDA	22-027421-001	USA	South Carolina	Atlantic	2022-08-24	Black Vulture	Non-host wild bird	Cluster 6	B1.1
USDA	22-027421-002	USA	South Carolina	Atlantic	2022-08-24	Black Vulture	Non-host wild bird	Cluster 6	B1.1
USDA	22-027421-003	USA	South Carolina	Atlantic	2022-08-24	Black Vulture	Non-host wild bird	Cluster 6	B1.1
USDA	22-027421-004	USA	South Carolina	Atlantic	2022-08-24	Black Vulture	Non-host wild bird	Cluster 6	B1.1
USDA	22-027484-001	USA	Michigan	Mississippi	2022-08-31	Canada goose	Waterfowl	Cluster 5	B1.3
USDA	22-027484-002	USA	Michigan	Mississippi	2022-08-31	Canada goose	Waterfowl	Cluster 5	B1.3
USDA	22-027571-001	USA	Minnesota	Mississippi	2022-09-01	Great horned owl	Non-host wild bird	Cluster 5	B1.3
USDA	22-027572-001	USA	California	Pacific	2022-08-30	Red-tailed hawk	Non-host wild bird	Cluster 4	B4.1
USDA	22-027573-001	USA	Nevada	Pacific	2022-08-23	Red-tailed hawk	Non-host wild bird	Cluster 2	B2.1
USDA	22-027600-001	USA	Washington	Pacific	2022-08-17	Bald eagle	Non-host wild bird	Cluster 4	B4.1
USDA	22-027710-001	USA	California	Pacific	2022-08-31	Great horned owl	Non-host wild bird	Cluster 4	B4.1
USDA	22-027736-001	USA	New York	Atlantic	2022-08-31	Wood Duck	Waterfowl	Cluster 3	A1
USDA	22-027737-002	USA	New Jersey	Atlantic	2022-08-31	Black Vulture	Non-host wild bird	Cluster 6	B1.1
USDA	22-027737-003	USA	New Jersey	Atlantic	2022-08-31	Black Vulture	Non-host wild bird	Cluster 6	B1.1
USDA	22-027791-006	USA	Utah	Pacific	2022-08-30	Goose	Waterfowl	Cluster 1	B3.2
USDA	22-027791-007	USA	Utah	Pacific	2022-08-30	Owl	Non-host wild bird	Cluster 1	B3.2
USDA	22-027792-005	USA	Utah	Pacific	2022-09-01	Canada goose	Waterfowl	Cluster 1	B3.2
USDA	22-027792-006	USA	Utah	Pacific	2022-09-01	American green-winged teal	Waterfowl	Cluster 1	B3.2
USDA	22-027793-001	USA	Utah	Pacific	2022-08-30	Turkey Vulture	Non-host wild bird	Cluster 4	B2.2
USDA	22-027816-010	USA	North Dakota	Central	2022-08-25	Northern shoveler	Waterfowl	Cluster 4	B2.2
USDA	22-027877-024	USA	Washington	Pacific	2022-08-29	Mallard	Waterfowl	Cluster 4	B4.1
USDA	22-027877-048	USA	Washington	Pacific	2022-08-29	Mallard	Waterfowl	Cluster 4	B4.1
USDA	22-027877-053	USA	Washington	Pacific	2022-08-29	Mallard	Waterfowl	Cluster 4	B4.1
USDA	22-027890-001	USA	Illinois	Mississippi	2022-09-02	American white Pelican	Sea/shore bird	Cluster 5	B1.2
USDA	22-027922-001	USA	Minnesota	Mississippi	2022-09-02	Wood Duck	Waterfowl	Cluster 5	B1.3
USDA	22-027922-003	USA	Minnesota	Mississippi	2022-09-02	Mallard	Waterfowl	Cluster 1	B3.2
USDA	22-027922-004	USA	Minnesota	Mississippi	2022-09-02	Canada goose	Waterfowl	Cluster 5	B1.3
USDA	22-027922-006	USA	Minnesota	Mississippi	2022-09-02	Canada goose	Waterfowl	Cluster 5	B1.3
USDA	22-027923-002	USA	Minnesota	Mississippi	2022-09-02	Green heron	Sea/shore bird	Cluster 5	B1.3
USDA	22-027995-001	USA	Georgia	Atlantic	2022-08-23	Black Vulture	Non-host wild bird	Cluster 6	B1.1
USDA	22-027995-002	USA	Georgia	Atlantic	2022-08-23	Black Vulture	Non-host wild bird	Cluster 6	B1.1
USDA	22-027995-003	USA	Georgia	Atlantic	2022-08-23	Black Vulture	Non-host wild bird	Cluster 6	B1.1
USDA	22-027995-005	USA	Georgia	Atlantic	2022-08-23	Black Vulture	Non-host wild bird	Cluster 6	B1.1
USDA	22-027995-006	USA	Georgia	Atlantic	2022-08-23	Black Vulture	Non-host wild bird	Cluster 6	B1.1
USDA	22-027995-007	USA	Georgia	Atlantic	2022-08-31	Black Vulture	Non-host wild bird	Cluster 6	B1.1
USDA	22-027995-008	USA	Georgia	Atlantic	2022-08-31	Black Vulture	Non-host wild bird	Cluster 6	B1.1
USDA	22-027995-009	USA	Georgia	Atlantic	2022-08-31	Black Vulture	Non-host wild bird	Cluster 6	B1.1
USDA	22-027995-011	USA	Georgia	Atlantic	2022-08-30	Black Vulture	Non-host wild bird	Cluster 6	B1.1
USDA	22-027995-012	USA	Georgia	Atlantic	2022-08-30	Black Vulture	Non-host wild bird	Cluster 6	B1.1
USDA	22-027995-013	USA	Georgia	Atlantic	2022-08-31	Black Vulture	Non-host wild bird	Cluster 6	B1.1
USDA	22-027995-014	USA	Georgia	Atlantic	2022-08-31	Black Vulture	Non-host wild bird	Cluster 6	B1.1
USDA	22-027995-015	USA	Georgia	Atlantic	2022-09-06	Black Vulture	Non-host wild bird	Cluster 6	B1.1
USDA	22-027995-016	USA	Georgia	Atlantic	2022-09-06	Black Vulture	Non-host wild bird	Cluster 6	B1.1
USDA	22-027996-001	USA	South Carolina	Atlantic	2022-08-25	Black Vulture	Non-host wild bird	Cluster 6	B1.1
USDA	22-027997-001	USA	North Carolina	Atlantic	2022-03-10	Bald eagle	Non-host wild bird	Cluster 5	B1.2
USDA	22-028071-001	USA	California	Pacific	2022-09-01	Goose	Waterfowl	Cluster 4	B4.1
USDA	22-028071-002	USA	California	Pacific	2022-09-01	Goose	Waterfowl	Cluster 4	B4.1
USDA	22-028072-001	USA	California	Pacific	2022-08-30	Goose	Waterfowl	Cluster 4	B4.1
USDA	22-028118-001	USA	Minnesota	Mississippi	2022-09-07	Canada goose	Waterfowl	Cluster 1	B3.2
USDA	22-028118-002	USA	Minnesota	Mississippi	2022-09-07	Canada goose	Waterfowl	Cluster 1	B3.2
USDA	22-028121-001	USA	Minnesota	Mississippi	2022-09-06	Great horned owl	Non-host wild bird	Cluster 5	B1.3
USDA	22-028132-001	USA	Washington	Pacific	2022-08-28	Bald eagle	Non-host wild bird	Cluster 4	B4.1
USDA	22-028137-001	USA	Washington	Pacific	2022-08-28	Bald eagle	Non-host wild bird	Cluster 4	B4.1
USDA	22-028139-001	USA	Washington	Pacific	2022-08-29	Canada goose	Waterfowl	Cluster 4	B4.1
USDA	22-028148-007	USA	Vermont	Atlantic	2022-09-01	Wood Duck	Waterfowl	Cluster 5	B1.2
USDA	22-028148-033	USA	Vermont	Atlantic	2022-09-01	Mallard	Waterfowl	Cluster 5	B1.2
USDA	22-028148-036	USA	Vermont	Atlantic	2022-09-01	Mallard	Waterfowl	Cluster 5	B1.2
USDA	22-028162-001	USA	Florida	Atlantic	2022-09-01	Black Vulture	Non-host wild bird	Cluster 6	B1.1
USDA	22-028247-007	USA	Alaska	Pacific	2022-08-16	Northern pintail	Waterfowl	Cluster 4	B4.1
USDA	22-028315-001	USA	Wisconsin	Mississippi	2022-09-02	Canada goose	Waterfowl	Cluster 5	B1.3
USDA	22-028315-002	USA	Wisconsin	Mississippi	2022-09-02	Canada goose	Waterfowl	Cluster 5	B1.3
USDA	22-028327-003	USA	North Dakota	Central	2022-08-30	American wigeon	Waterfowl	Cluster 4	B2.2
USDA	22-028327-004	USA	North Dakota	Central	2022-08-30	Gadwall	Waterfowl	Cluster 4	B2.2
USDA	22-028327-006	USA	North Dakota	Central	2022-08-30	American Blue-winged teal	Waterfowl	Cluster 4	B2.2
USDA	22-028327-014	USA	North Dakota	Central	2022-08-30	Gadwall	Waterfowl	Cluster 4	B2.2
USDA	22-028327-015	USA	North Dakota	Central	2022-08-30	Gadwall	Waterfowl	Cluster 4	B2.2
USDA	22-028327-017	USA	North Dakota	Central	2022-08-30	Gadwall	Waterfowl	Cluster 4	B2.2
USDA	22-028328-001	USA	North Dakota	Central	2022-08-30	Mallard	Waterfowl	Cluster 4	B2.2
USDA	22-028328-003	USA	North Dakota	Central	2022-08-30	Gadwall	Waterfowl	Cluster 4	B2.2
USDA	22-028546-001	USA	North Dakota	Central	2022-08-30	Canada goose	Waterfowl	Cluster 4	B2.2
USDA	22-028569-001	USA	Georgia	Atlantic	2022-09-01	Black Vulture	Non-host wild bird	Cluster 6	B1.1
USDA	22-028569-002	USA	Georgia	Atlantic	2022-09-01	Black Vulture	Non-host wild bird	Cluster 6	B1.1
USDA	22-028569-003	USA	Georgia	Atlantic	2022-09-01	Black Vulture	Non-host wild bird	Cluster 6	B1.1
USDA	22-028569-004	USA	Georgia	Atlantic	2022-09-06	Black Vulture	Non-host wild bird	Cluster 6	B1.1
USDA	22-028569-005	USA	Georgia	Atlantic	2022-09-06	Black Vulture	Non-host wild bird	Cluster 6	B1.1
USDA	22-028571-001	USA	Virginia	Atlantic	2022-09-06	Canada goose	Waterfowl	Cluster 5	B1.3
USDA	22-028574-001	USA	Minnesota	Mississippi	2022-09-11	Bald eagle	Non-host wild bird	Cluster 5	B1.3
USDA	22-028575-001	USA	Minnesota	Mississippi	Unknown	Wood Duck	Waterfowl	Cluster 5	B1.3
USDA	22-028596-002	USA	North Dakota	Central	2022-09-01	American Blue-winged teal	Waterfowl	Cluster 4	B2.2
USDA	22-028597-001	USA	North Dakota	Central	2022-08-29	Gadwall	Waterfowl	Cluster 4	B2.2
USDA	22-028621-007	USA	New Hampshire	Atlantic	2022-09-07	Mallard	Waterfowl	Cluster 3	A2
USDA	22-028621-034	USA	New Hampshire	Atlantic	2022-09-07	Mallard	Waterfowl	Cluster 3	A2
USDA	22-028671-001	USA	Minnesota	Mississippi	2022-09-12	Bald eagle	Non-host wild bird	Cluster 5	B1.3
USDA	22-028671-002	USA	Minnesota	Mississippi	2022-09-12	Great horned owl	Non-host wild bird	Cluster 5	B1.3
USDA	22-028681-001	USA	Wisconsin	Mississippi	2022-08-30	American white Pelican	Sea/shore bird	Cluster 5	B1.3
USDA	22-028681-002	USA	Wisconsin	Mississippi	2022-09-01	American white Pelican	Sea/shore bird	Cluster 5	B1.3
USDA	22-028755-003	USA	Mississippi	Mississippi	2022-09-10	Blue-winged teal	Waterfowl	Cluster 4	B2.2
USDA	22-028821-001	USA	Washington	Pacific	2022-09-03	Mallard	Waterfowl	Cluster 4	B4.1
USDA	22-028824-005	USA	Washington	Pacific	2022-09-01	Mallard	Waterfowl	Cluster 4	B4.1
USDA	22-028827-008	USA	Michigan	Mississippi	2022-09-08	Mallard	Waterfowl	Cluster 4	B4.1
USDA	22-028829-005	USA	Michigan	Mississippi	2022-09-08	Mallard	Waterfowl	Cluster 4	B2.2
USDA	22-028881-001	USA	California	Pacific	2022-09-09	Canada goose	Waterfowl	Cluster 4	B4.1
USDA	22-028882-001	USA	California	Pacific	2022-09-09	American white Pelican	Sea/shore bird	Cluster 4	B4.1
USDA	22-028884-001	USA	California	Pacific	2022-09-07	Canada goose	Waterfowl	Cluster 4	B4.1
USDA	22-028884-002	USA	California	Pacific	2022-09-07	Canada goose	Waterfowl	Cluster 4	B4.1
USDA	22-028884-003	USA	California	Pacific	2022-09-07	Canada goose	Waterfowl	Cluster 4	B4.1
USDA	22-028884-004	USA	California	Pacific	2022-09-07	Canada goose	Waterfowl	Cluster 4	B4.1
USDA	22-028886-001	USA	California	Pacific	2022-09-07	Canada goose	Waterfowl	Cluster 4	B4.1
USDA	22-028887-001	USA	California	Pacific	2022-09-07	Canada goose	Waterfowl	Cluster 4	B4.1
USDA	22-028905-001	USA	Minnesota	Mississippi	Unknown	Canada goose	Waterfowl	Cluster 5	B1.2
USDA	22-028905-002	USA	Minnesota	Mississippi	Unknown	Canada goose	Waterfowl	Cluster 5	B1.3
USDA	22-028981-005	USA	Washington	Pacific	2022-09-08	American green-winged teal	Waterfowl	Cluster 4	B4.1
USDA	22-029049-001	USA	Washington	Pacific	2022-09-07	Canada goose	Waterfowl	Cluster 4	B4.1
USDA	22-029063-031	USA	Vermont	Atlantic	2022-09-09	Wood Duck	Waterfowl	Cluster 3	A1
USDA	22-029080-001	USA	New York	Atlantic	2022-09-09	Canada goose	Waterfowl	Cluster 5	B1.3
USDA	22-029080-002	USA	New York	Atlantic	2022-09-09	Canada goose	Waterfowl	Cluster 5	B1.2
USDA	22-029080-003	USA	New York	Atlantic	2022-09-09	Canada goose	Waterfowl	Cluster 5	B1.3
USDA	22-029081-001	USA	New York	Atlantic	2022-09-12	Canada goose	Waterfowl	Cluster 5	B1.2
USDA	22-029081-002	USA	New York	Atlantic	2022-09-12	Canada goose	Waterfowl	Cluster 5	B1.3
USDA	22-029081-003	USA	New York	Atlantic	2022-09-12	Canada goose	Waterfowl	Cluster 5	B1.2
USDA	22-029081-004	USA	New York	Atlantic	2022-09-12	Canada goose	Waterfowl	Cluster 5	B1.2
USDA	22-029100-001	USA	Alaska	Pacific	2022-09-04	Northern pintail	Waterfowl	Cluster 1	B3.2
USDA	22-029101-001	USA	Alaska	Pacific	2022-09-05	Mallard	Waterfowl	Cluster 1	B3.2
USDA	22-029101-004	USA	Alaska	Pacific	2022-09-05	American green-winged teal	Waterfowl	Cluster 1	B3.2
USDA	22-029125-003	USA	Rhode Island	Atlantic	2022-09-13	Osprey	Non-host wild bird	Cluster 5	B1.2
USDA	22-029130-001	USA	Minnesota	Mississippi	Unknown	Bald eagle	Non-host wild bird	Cluster 5	B1.3
USDA	22-029146-001	USA	Pennsylvania	Atlantic	2022-09-13	Black Vulture	Non-host wild bird	Cluster 6	B1.1
USDA	22-029187-001	USA	Michigan	Mississippi	2022-09-12	Red-tailed hawk	Non-host wild bird	Cluster 5	B1.3
USDA	22-029191-001	USA	Illinois	Mississippi	Unknown	Swan	Waterfowl	Cluster 5	B1.3
USDA	22-029194-001	USA	Wyoming	Central	2022-09-11	Great horned owl	Non-host wild bird	Cluster 1	B3.2
USDA	22-029199-001	USA	New York	Atlantic	2022-09-11	Mute Swan	Waterfowl	Cluster 5	B1.3
USDA	22-029199-002	USA	New York	Atlantic	2022-09-11	Mute Swan	Waterfowl	Cluster 5	B1.3
USDA	22-029200-001	USA	New York	Atlantic	2022-09-14	black skimmer	Sea/shore bird	Cluster 5	B1.2
USDA	22-029310-001	USA	Minnesota	Mississippi	Unknown	Canada goose	Waterfowl	Cluster 5	B1.3
USDA	22-029310-002	USA	Minnesota	Mississippi	Unknown	Canada goose	Waterfowl	Cluster 5	B1.3
USDA	22-029332-001	USA	Oklahoma	Central	2022-09-10	Blue-winged teal	Waterfowl	Cluster 1	B3.2
USDA	22-029332-004	USA	Oklahoma	Central	2022-09-10	Blue-winged teal	Waterfowl	Cluster 1	B3.2
USDA	22-029332-005	USA	Oklahoma	Central	2022-09-10	Blue-winged teal	Waterfowl	Cluster 1	B3.2
USDA	22-029332-006	USA	Oklahoma	Central	2022-09-10	Blue-winged teal	Waterfowl	Cluster 1	B3.2
USDA	22-029332-008	USA	Oklahoma	Central	2022-09-10	Blue-winged teal	Waterfowl	Cluster 1	B3.2
USDA	22-029332-011	USA	Oklahoma	Central	2022-09-10	Blue-winged teal	Waterfowl	Cluster 1	B3.2
USDA	22-029332-018	USA	Oklahoma	Central	2022-09-10	Blue-winged teal	Waterfowl	Cluster 1	B3.2
USDA	22-029332-019	USA	Oklahoma	Central	2022-09-10	Blue-winged teal	Waterfowl	Cluster 1	B3.2
USDA	22-029332-023	USA	Oklahoma	Central	2022-09-10	Blue-winged teal	Waterfowl	Cluster 1	B3.2
USDA	22-029332-029	USA	Oklahoma	Central	2022-09-10	Blue-winged teal	Waterfowl	Cluster 4	B2.2
USDA	22-029332-033	USA	Oklahoma	Central	2022-09-10	Blue-winged teal	Waterfowl	Cluster 4	B2.2
USDA	22-029332-034	USA	Oklahoma	Central	2022-09-10	Blue-winged teal	Waterfowl	Cluster 1	B3.2
USDA	22-029336-017	USA	Illinois	Mississippi	2022-09-10	Blue-winged teal	Waterfowl	Cluster 5	B1.3
USDA	22-029357-001	USA	Utah	Pacific	2022-09-15	Great horned owl	Non-host wild bird	Cluster 4	B2.2
USDA	22-029358-001	USA	Utah	Pacific	2022-09-15	Duck	Domestic waterfowl	Cluster 4	B2.2
USDA	22-029359-001	USA	Utah	Pacific	2022-09-15	Turkey Vulture	Non-host wild bird	Cluster 4	B2.2
USDA	22-029379-002	USA	Florida	Atlantic	2022-09-07	Black Vulture	Non-host wild bird	Cluster 6	B1.1
USDA	22-029397-001	USA	North Dakota	Central	2022-09-13	Canada goose	Waterfowl	Cluster 4	B2.2
USDA	22-029467-002	USA	California	Pacific	2022-09-14	Canada goose	Waterfowl	Cluster 4	B4.1
USDA	22-029470-001	USA	California	Pacific	2022-09-12	Canada goose	Waterfowl	Cluster 4	B4.1
USDA	22-029470-002	USA	California	Pacific	2022-09-12	American white Pelican	Sea/shore bird	Cluster 4	B4.1
USDA	22-029577-010	USA	New York	Atlantic	2022-09-09	Mallard	Waterfowl	Cluster 5	B1.2
USDA	22-029578-004	USA	New York	Atlantic	2022-09-12	Mallard	Waterfowl	Cluster 5	Unassigned
USDA	22-029578-021	USA	New York	Atlantic	2022-09-12	Mallard	Waterfowl	Cluster 5	B1.2
USDA	22-029578-023	USA	New York	Atlantic	2022-09-12	Mallard	Waterfowl	Cluster 5	B1.2
USDA	22-029586-002	USA	Virginia	Atlantic	2022-09-08	Canada goose	Waterfowl	Cluster 5	B1.3
USDA	22-029610-001	USA	Minnesota	Mississippi	2022-09-19	Wood Duck	Waterfowl	Cluster 5	B1.3
USDA	22-029725-007	USA	Indiana	Mississippi	2022-09-10	American green-winged teal	Waterfowl	Cluster 1	B3.2
USDA	22-029792-001	USA	New York	Atlantic	2022-09-16	Canada goose	Waterfowl	Cluster 5	B1.2
USDA	22-029818-001	USA	Colorado	Central	2022-09-19	Red-tailed hawk	Non-host wild bird	Cluster 1	B3.2
USDA	22-029821-004	USA	Utah	Pacific	2022-09-20	Turkey Vulture	Non-host wild bird	Cluster 4	B2.2
USDA	22-029822-001	USA	Utah	Pacific	2022-09-08	Turkey Vulture	Non-host wild bird	Cluster 4	B2.2
USDA	22-029822-002	USA	Utah	Pacific	2022-09-08	Turkey Vulture	Non-host wild bird	Cluster 4	B2.2
USDA	22-029822-003	USA	Utah	Pacific	2022-09-08	Canada goose	Waterfowl	Cluster 4	B2.2
USDA	22-029882-002	USA	Minnesota	Mississippi	2022-09-11	American Blue-winged teal	Waterfowl	Cluster 1	B3.2
USDA	22-029882-004	USA	Minnesota	Mississippi	Unknown	American Blue-winged teal	Waterfowl	Cluster 2	B2.1
USDA	22-029888-002	USA	Texas	Central	2022-09-11	American Blue-winged teal	Waterfowl	Cluster 1	B3.2
USDA	22-029889-003	USA	Minnesota	Mississippi	2022-09-09	Mallard	Waterfowl	Cluster 5	B1.3
USDA	22-029889-004	USA	Minnesota	Mississippi	2022-09-09	Mallard	Waterfowl	Cluster 5	B1.3
USDA	22-029889-007	USA	Minnesota	Mississippi	2022-09-09	Mallard	Waterfowl	Cluster 5	B1.3
USDA	22-029889-012	USA	Minnesota	Mississippi	2022-09-09	American green-winged teal	Waterfowl	Cluster 1	B3.2
USDA	22-029889-015	USA	Minnesota	Mississippi	2022-09-09	Mallard	Waterfowl	Cluster 5	B1.3
USDA	22-029901-002	USA	Minnesota	Mississippi	Unknown	Teal	Waterfowl	Cluster 5	B1.3
USDA	22-029918-001	USA	Florida	Atlantic	2022-09-18	Black Vulture	Non-host wild bird	Cluster 6	B1.1
USDA	22-029924-007	USA	Maine	Atlantic	2022-08-31	Mallard	Waterfowl	Cluster 4	B4.1
USDA	22-029929-002	USA	New York	Atlantic	2022-09-19	Canada goose	Waterfowl	Cluster 5	B1.3
USDA	22-029929-003	USA	New York	Atlantic	2022-09-19	Mallard	Waterfowl	Cluster 5	B1.3
USDA	22-029948-001	USA	Oregon	Pacific	2022-09-19	Great horned owl	Non-host wild bird	Cluster 4	B4.1
USDA	22-030040-001	USA	Wisconsin	Mississippi	2022-09-06	Great egret	Sea/shore bird	Cluster 5	B1.3
USDA	22-030041-001	USA	Wisconsin	Mississippi	2022-09-12	Sandhill crane	Non-host wild bird	Cluster 5	B1.3
USDA	22-030047-001	USA	Wyoming	Central	2022-09-21	Peregrine falcon	Non-host wild bird	Cluster 2	B2.1
USDA	22-030048-001	USA	Wyoming	Central	2022-09-19	Turkey Vulture	Non-host wild bird	Cluster 4	B2.2
USDA	22-030049-002	USA	Wyoming	Central	2022-09-14	Trumpeter Swan	Waterfowl	Cluster 1	B3.2
USDA	22-030049-003	USA	Wyoming	Central	2022-09-14	Trumpeter Swan	Waterfowl	Cluster 1	B3.2
USDA	22-030175-001	USA	Montana	Pacific	2022-09-16	Owl	Non-host wild bird	Cluster 4	B2.2
USDA	22-030200-001	USA	New York	Atlantic	2022-09-21	Canada goose	Waterfowl	Cluster 5	B1.3
USDA	22-030201-001	USA	New York	Atlantic	2022-09-21	Mallard	Waterfowl	Cluster 5	B1.3
USDA	22-030202-001	USA	New York	Atlantic	2022-09-21	Canada goose	Waterfowl	Cluster 5	B1.3
USDA	22-030203-001	USA	New York	Atlantic	2022-09-21	Canada goose	Waterfowl	Cluster 5	B1.3
USDA	22-030257-001	USA	Minnesota	Mississippi	2022-09-25	Peregrine falcon	Non-host wild bird	Cluster 5	B1.3
USDA	22-030258-001	USA	Minnesota	Mississippi	Unknown	Merganser	Waterfowl	Cluster 5	B1.3
USDA	22-030262-001	USA	Pennsylvania	Atlantic	2022-09-19	Canada goose	Waterfowl	Cluster 5	B1.3
USDA	22-030262-003	USA	Pennsylvania	Atlantic	2022-09-19	Canada goose	Waterfowl	Cluster 3	A1
USDA	22-030263-001	USA	Montana	Pacific	2022-09-16	Trumpeter Swan	Waterfowl	Cluster 1	B3.2
USDA	22-030264-001	USA	Wisconsin	Mississippi	2022-05-24	Double-crested Cormorant	Sea/shore bird	Cluster 3	A1
USDA	22-030274-001	USA	Georgia	Atlantic	Unknown	Black Vulture	Non-host wild bird	Cluster 6	B1.1
USDA	22-030274-002	USA	Georgia	Atlantic	Unknown	Black Vulture	Non-host wild bird	Cluster 6	B1.1
USDA	22-030321-001	USA	Massachusetts	Atlantic	2022-09-21	Canada goose	Waterfowl	Cluster 5	B1.2
USDA	22-030321-002	USA	Massachusetts	Atlantic	2022-09-21	Canada goose	Waterfowl	Cluster 5	B1.2
USDA	22-030321-004	USA	Massachusetts	Atlantic	2022-09-21	Canada goose	Waterfowl	Cluster 5	B1.2
USDA	22-030321-006	USA	Massachusetts	Atlantic	2022-09-21	Canada goose	Waterfowl	Cluster 5	B1.2
USDA	22-030321-007	USA	Massachusetts	Atlantic	2022-09-21	Canada goose	Waterfowl	Cluster 5	B1.2
USDA	22-030337-001	USA	California	Pacific	2022-09-19	Canada goose	Waterfowl	Cluster 4	B4.1
USDA	22-030337-002	USA	California	Pacific	2022-09-19	Canada goose	Waterfowl	Cluster 4	B4.1
USDA	22-030338-001	USA	California	Pacific	2022-09-20	Canada goose	Waterfowl	Cluster 4	B4.1
USDA	22-030338-002	USA	California	Pacific	2022-09-20	Canada goose	Waterfowl	Cluster 4	B4.1
USDA	22-030404-001	USA	Minnesota	Mississippi	2022-09-26	Mallard	Waterfowl	Cluster 5	B1.3
USDA	22-030419-001	USA	New York	Atlantic	2022-09-23	Canada goose	Waterfowl	Cluster 5	B1.2
USDA	22-030420-010	USA	New York	Atlantic	2022-09-14	Mallard	Waterfowl	Cluster 5	B1.2
USDA	22-030420-019	USA	New York	Atlantic	2022-09-14	Mallard	Waterfowl	Cluster 5	B1.2
USDA	22-030422-001	USA	Georgia	Atlantic	2022-09-22	Black Vulture	Non-host wild bird	Cluster 6	B1.1
USDA	22-030423-014	USA	Minnesota	Mississippi	2022-09-10	Blue-winged teal	Waterfowl	Cluster 1	B3.2
USDA	22-030423-022	USA	Minnesota	Mississippi	2022-09-10	Blue-winged teal	Waterfowl	Cluster 1	B3.2
USDA	22-030423-040	USA	Minnesota	Mississippi	2022-09-10	American Blue-winged teal	Waterfowl	Cluster 5	B1.3
USDA	22-030423-047	USA	Minnesota	Mississippi	2022-09-11	Blue-winged teal	Waterfowl	Cluster 1	B3.2
USDA	22-030453-001	USA	Oregon	Pacific	2022-09-13	Red-tailed hawk	Non-host wild bird	Cluster 2	B2.1
USDA	22-030585-001	USA	New York	Atlantic	2022-09-26	Common loon	Waterfowl	Cluster 6	B1.1
USDA	22-030589-001	USA	New York	Atlantic	2022-09-26	Black Vulture	Non-host wild bird	Cluster 6	B1.1
USDA	22-030593-001	USA	New York	Atlantic	2022-08-30	Owl	Non-host wild bird	Cluster 3	A1
USDA	22-030620-001	USA	Colorado	Central	2022-09-24	Blue-winged teal	Waterfowl	Cluster 3	A1
USDA	22-030621-001	USA	Colorado	Central	2022-09-22	Canada goose	Waterfowl	Cluster 4	B2.2
USDA	22-030622-001	USA	Colorado	Central	2022-09-26	Canada goose	Waterfowl	Cluster 4	B2.2
USDA	22-030635-001	USA	Washington	Pacific	2022-09-12	Peregrine falcon	Non-host wild bird	Cluster 4	B4.1
USDA	22-030636-001	USA	Washington	Pacific	2022-09-18	Peregrine falcon	Non-host wild bird	Cluster 4	B4.1
USDA	22-030637-001	USA	Washington	Pacific	2022-09-16	Great horned owl	Non-host wild bird	Cluster 4	B4.1
USDA	22-030638-001	USA	Idaho	Pacific	2022-09-17	Canada goose	Waterfowl	Cluster 4	B4.1
USDA	22-030638-002	USA	Idaho	Pacific	2022-09-17	Canada goose	Waterfowl	Cluster 4	B4.1
USDA	22-030640-001	USA	Idaho	Pacific	2022-09-19	Canada goose	Waterfowl	Cluster 4	B2.2
USDA	22-030640-002	USA	Idaho	Pacific	2022-09-19	Canada goose	Waterfowl	Cluster 4	B2.2
USDA	22-030742-001	USA	Oregon	Pacific	2022-08-21	Mallard	Waterfowl	Cluster 4	B4.1
USDA	22-030745-001	USA	Oregon	Pacific	2022-09-22	Canada goose	Waterfowl	Cluster 4	B4.1
USDA	22-030747-001	USA	Wyoming	Central	2022-09-16	Great horned owl	Non-host wild bird	Cluster 1	B3.2
USDA	22-030755-001	USA	Pennsylvania	Atlantic	2022-09-20	Black Vulture	Non-host wild bird	Cluster 6	B1.1
USDA	22-030756-001	USA	Pennsylvania	Atlantic	2022-09-20	Canada goose	Waterfowl	Cluster 5	B1.2
USDA	22-030855-001	USA	Minnesota	Mississippi	2022-09-27	Cooper's Hawk	Non-host wild bird	Cluster 5	B1.2
USDA	22-030855-002	USA	Minnesota	Mississippi	2022-09-26	Great horned owl	Non-host wild bird	Cluster 5	B1.3
USDA	22-030915-001	USA	Utah	Pacific	2022-09-27	Eared grebe	Waterfowl	Cluster 1	B3.2
USDA	22-030915-002	USA	Utah	Pacific	2022-09-27	Eared grebe	Waterfowl	Cluster 1	B3.2
USDA	22-030915-003	USA	Utah	Pacific	2022-09-27	Eared grebe	Waterfowl	Cluster 1	B3.2
USDA	22-030918-001	USA	New York	Atlantic	2022-09-29	Canada goose	Waterfowl	Cluster 5	B1.2
USDA	22-030934-001	USA	Connecticut	Atlantic	2022-09-30	Great horned owl	Non-host wild bird	Cluster 5	B1.2
USDA	22-030935-001	USA	Wyoming	Central	2022-09-20	Turkey Vulture	Non-host wild bird	Cluster 4	B2.2
USDA	22-030937-001	USA	Wyoming	Central	2022-09-28	Wood Duck	Waterfowl	Cluster 1	B3.2
USDA	22-030941-001	USA	Colorado	Central	2022-09-28	Ring-billed gull	Sea/shore bird	Cluster 1	B3.2
USDA	22-031068-001	USA	Arizona	Pacific	2022-09-28	Canada goose	Waterfowl	Cluster 4	B2.2
USDA	22-031157-002	USA	Minnesota	Mississippi	2022-09-29	Turkey Vulture	Non-host wild bird	Cluster 1	B3.2
USDA	22-031157-003	USA	Minnesota	Mississippi	2022-09-29	Peregrine falcon	Non-host wild bird	Cluster 1	B3.2
USDA	22-031162-001	USA	Colorado	Central	2022-09-29	Canada goose	Waterfowl	Cluster 4	B4.1
USDA	22-031163-004	USA	Montana	Pacific	2022-09-24	Blue-winged teal	Waterfowl	Cluster 1	B3.2
USDA	22-031164-001	USA	Colorado	Central	2022-09-29	Turkey Vulture	Non-host wild bird	Cluster 4	B2.2
USDA	22-031183-001	USA	Montana	Pacific	2022-09-25	Great horned owl	Non-host wild bird	Cluster 2	B2.1
USDA	22-031242-001	USA	Minnesota	Mississippi	2022-09-12	Mallard	Waterfowl	Cluster 5	B1.3
USDA	22-031242-002	USA	Minnesota	Mississippi	2022-09-12	Mallard	Waterfowl	Cluster 5	B1.2
USDA	22-031242-004	USA	Minnesota	Mississippi	2022-09-18	Blue-winged teal	Waterfowl	Cluster 5	B1.3
USDA	22-031242-005	USA	Minnesota	Mississippi	2022-09-18	Blue-winged teal	Waterfowl	Cluster 5	B1.3
USDA	22-031265-001	USA	Alaska	Pacific	2022-09-20	Raven	Non-host wild bird	Cluster 1	B3.2
USDA	22-031265-003	USA	Alaska	Pacific	2022-09-20	Duck	Domestic waterfowl	Cluster 4	B4.1
USDA	22-031267-001	USA	Washington	Pacific	2022-09-21	Sandhill crane	Non-host wild bird	Cluster 4	B4.1
USDA	22-031341-001	USA	Wyoming	Central	2022-10-03	Great horned owl	Non-host wild bird	Cluster 4	B2.2
USDA	22-031350-010	USA	Texas	Central	2022-09-10	Blue-winged teal	Waterfowl	Cluster 4	B2.2
USDA	22-031350-016	USA	Texas	Central	2022-09-10	Blue-winged teal	Waterfowl	Cluster 1	B3.2
USDA	22-031350-024	USA	Texas	Central	2022-09-10	Blue-winged teal	Waterfowl	Cluster 1	B3.2
USDA	22-031351-010	USA	Texas	Central	2022-09-17	Blue-winged teal	Waterfowl	Cluster 1	B3.2
USDA	22-031352-026	USA	Texas	Central	2022-09-24	Blue-winged teal	Waterfowl	Cluster 1	B3.2
USDA	22-031352-027	USA	Texas	Central	2022-09-24	Blue-winged teal	Waterfowl	Cluster 1	B3.2
USDA	22-031379-006	USA	Massachusetts	Atlantic	2022-09-22	Mallard	Waterfowl	Cluster 5	B1.3
USDA	22-031395-009	USA	Texas	Central	2022-09-24	Blue-winged teal	Waterfowl	Cluster 1	B3.2
USDA	22-031397-001	USA	Texas	Central	2022-09-11	Blue-winged teal	Waterfowl	Cluster 4	B2.2
USDA	22-031399-012	USA	Alaska	Pacific	2022-09-02	Northern pintail	Waterfowl	Cluster 1	B3.2
USDA	22-031399-015	USA	Alaska	Pacific	2022-09-02	Northern pintail	Waterfowl	Cluster 1	B3.2
USDA	22-031399-019	USA	Alaska	Pacific	2022-09-02	American green-winged teal	Waterfowl	Cluster 1	B3.2
USDA	22-031400-001	USA	Alaska	Pacific	2022-09-03	Mallard	Waterfowl	Cluster 1	B3.2
USDA	22-031409-001	USA	Oregon	Pacific	2022-09-28	American white Pelican	Sea/shore bird	Cluster 4	B4.1
USDA	22-031456-001	USA	Minnesota	Mississippi	2022-10-03	Barred owl	Non-host wild bird	Cluster 5	B1.3
USDA	22-031606-001	USA	Wyoming	Central	2022-10-03	Turkey Vulture	Non-host wild bird	Cluster 1	B3.2
USDA	22-031607-001	USA	Wyoming	Central	2022-09-29	Great horned owl	Non-host wild bird	Cluster 1	B3.2
USDA	22-031703-001	USA	Texas	Central	2022-10-01	Canada goose	Waterfowl	Cluster 4	B2.2
USDA	22-031728-004	USA	Utah	Pacific	2022-10-04	Duck	Domestic waterfowl	Cluster 1	B3.2
USDA	22-031728-005	USA	Utah	Pacific	2022-10-04	Duck	Domestic waterfowl	Cluster 1	B3.2
USDA	22-031729-002	USA	Utah	Pacific	2022-09-29	Gull	Sea/shore bird	Cluster 1	B3.2
USDA	22-031729-007	USA	Utah	Pacific	2022-09-29	Gull	Sea/shore bird	Cluster 1	B3.2
USDA	22-031740-001	USA	Colorado	Central	2022-10-01	Great horned owl	Non-host wild bird	Cluster 4	B2.2
USDA	22-031741-001	USA	Colorado	Central	2022-10-04	Red-tailed hawk	Non-host wild bird	Cluster 1	B3.2
USDA	22-031744-001	USA	Minnesota	Mississippi	2022-10-05	Mallard	Waterfowl	Cluster 5	B1.3
USDA	22-031760-001	USA	Michigan	Mississippi	2022-09-29	Bald eagle	Non-host wild bird	Cluster 5	B1.3
USDA	22-031790-001	USA	Virginia	Atlantic	2022-09-28	Black Vulture	Non-host wild bird	Cluster 6	B1.1
USDA	22-031888-001	USA	New York	Atlantic	2022-10-04	Mute Swan	Waterfowl	Cluster 5	B1.2
USDA	22-031916-001	USA	Alaska	Pacific	2022-10-04	Glaucous Gull	Sea/shore bird	Cluster 3	A3
USDA	22-031997-002	USA	Florida	Atlantic	2022-10-05	Black Vulture	Non-host wild bird	Cluster 6	B1.1
USDA	22-031997-003	USA	Florida	Atlantic	2022-10-05	Muscovy Duck	Waterfowl	Cluster 5	B1.3
USDA	22-031997-004	USA	Florida	Atlantic	2022-10-05	Mallard	Waterfowl	Cluster 5	B1.3
USDA	22-032043-001	USA	Oregon	Pacific	2022-10-05	Turkey Vulture	Non-host wild bird	Cluster 4	B4.1
USDA	22-032045-001	USA	Ohio	Mississippi	2022-09-29	Canada goose	Waterfowl	Cluster 5	B1.2
USDA	22-032045-002	USA	Ohio	Mississippi	2022-09-29	Canada goose	Waterfowl	Cluster 5	B1.2
USDA	22-032213-001	USA	Wyoming	Central	2022-10-10	Red-tailed hawk	Non-host wild bird	Cluster 4	B2.2
USDA	22-032264-001	USA	North Dakota	Central	2022-09-28	Great horned owl	Non-host wild bird	Cluster 1	B3.2
USDA	22-032266-001	USA	North Dakota	Central	2022-09-28	American white Pelican	Sea/shore bird	Cluster 1	B3.2
USDA	22-032267-001	USA	North Dakota	Central	2022-10-01	American green-winged teal	Waterfowl	Cluster 1	B3.2
USDA	22-032373-001	USA	Iowa	Mississippi	2022-10-09	American white Pelican	Sea/shore bird	Cluster 1	B3.2
USDA	22-032401-001	USA	Connecticut	Atlantic	2022-10-07	Turkey Vulture	Non-host wild bird	Cluster 5	B1.3
USDA	22-032425-008	USA	North Dakota	Central	2022-10-01	Blue-winged teal	Waterfowl	Cluster 4	B2.2
USDA	22-032451-001	USA	Georgia	Atlantic	2022-10-03	Black Vulture	Non-host wild bird	Cluster 6	B1.1
USDA	22-032451-005	USA	Georgia	Atlantic	2022-09-29	Black Vulture	Non-host wild bird	Cluster 6	B1.1
USDA	22-032451-006	USA	Georgia	Atlantic	2022-09-29	Black Vulture	Non-host wild bird	Cluster 6	B1.1
USDA	22-032451-007	USA	Georgia	Atlantic	2022-09-29	Black Vulture	Non-host wild bird	Cluster 6	B1.1
USDA	22-032451-008	USA	Georgia	Atlantic	2022-09-29	Black Vulture	Non-host wild bird	Cluster 6	B1.1
USDA	22-032452-001	USA	Kentucky	Mississippi	2022-10-04	Canada goose	Waterfowl	Cluster 5	B1.3
USDA	22-032452-002	USA	Kentucky	Mississippi	2022-10-04	Duck	Domestic waterfowl	Cluster 5	B1.3
USDA	22-032452-003	USA	Kentucky	Mississippi	2022-10-04	Duck	Domestic waterfowl	Cluster 5	B1.3
USDA	22-032453-001	USA	Kansas	Central	2022-10-04	Canada goose	Waterfowl	Cluster 5	B1.3
USDA	22-032454-001	USA	Georgia	Atlantic	2022-10-11	Black Vulture	Non-host wild bird	Cluster 6	B1.1
USDA	22-032511-001	USA	Missouri	Mississippi	2022-10-08	Canada goose	Waterfowl	Cluster 5	B1.3
USDA	22-032511-002	USA	Missouri	Mississippi	2022-10-08	Canada goose	Waterfowl	Cluster 5	B1.3
USDA	22-032511-020	USA	Iowa	Mississippi	2022-10-01	American Blue-winged teal	Waterfowl	Cluster 1	B3.2
USDA	22-032511-043	USA	Minnesota	Mississippi	2022-09-24	Mallard	Waterfowl	Cluster 5	B1.3
USDA	22-032511-063	USA	Minnesota	Mississippi	2022-09-24	American green-winged teal	Waterfowl	Cluster 1	B3.2
USDA	22-032511-067	USA	Minnesota	Mississippi	2022-09-24	Mallard	Waterfowl	Cluster 5	B1.3
USDA	22-032511-070	USA	Minnesota	Mississippi	2022-09-24	American Blue-winged teal	Waterfowl	Cluster 5	B1.3
USDA	22-032511-077	USA	Minnesota	Mississippi	2022-09-24	American Blue-winged teal	Waterfowl	Cluster 5	B1.3
USDA	22-032511-097	USA	Missouri	Mississippi	2022-09-23	American green-winged teal	Waterfowl	Cluster 5	B1.3
USDA	22-032511-101	USA	Missouri	Mississippi	2022-09-23	American Blue-winged teal	Waterfowl	Cluster 1	B3.2
USDA	22-032511-165	USA	Iowa	Mississippi	2022-09-15	Wood Duck	Waterfowl	Cluster 5	B1.3
USDA	22-032511-168	USA	Iowa	Mississippi	2022-09-15	Wood Duck	Waterfowl	Cluster 5	B1.3
USDA	22-032511-190	USA	Iowa	Mississippi	2022-10-08	American green-winged teal	Waterfowl	Cluster 5	B1.3
USDA	22-032568-002	USA	Minnesota	Mississippi	Unknown	American green-winged teal	Waterfowl	Cluster 5	B1.3
USDA	22-032573-001	USA	California	Pacific	2022-10-03	Peregrine falcon	Non-host wild bird	Cluster 1	B3.2
USDA	22-032575-002	USA	California	Pacific	2022-10-03	Canada goose	Waterfowl	Cluster 4	B2.2
USDA	22-032575-003	USA	California	Pacific	2022-10-03	Canada goose	Waterfowl	Cluster 4	B2.2
USDA	22-032575-004	USA	California	Pacific	2022-10-03	Canada goose	Waterfowl	Cluster 4	B2.2
USDA	22-032576-001	USA	California	Pacific	2022-09-28	Canada goose	Waterfowl	Cluster 4	B4.1
USDA	22-032578-001	USA	California	Pacific	2022-09-28	Canada goose	Waterfowl	Cluster 4	B4.1
USDA	22-032578-002	USA	California	Pacific	2022-09-28	Canada goose	Waterfowl	Cluster 4	B4.1
USDA	22-032579-001	USA	California	Pacific	2022-09-28	Canada goose	Waterfowl	Cluster 4	B4.1
USDA	22-032580-001	USA	California	Pacific	2022-09-28	Western Gull	Sea/shore bird	Cluster 4	B4.1
USDA	22-032604-001	USA	Wyoming	Central	2022-10-11	Great horned owl	Non-host wild bird	Cluster 1	B3.2
USDA	22-032613-001	USA	Virginia	Atlantic	2022-09-28	Black Vulture	Non-host wild bird	Cluster 6	B1.1
USDA	22-032614-001	USA	Virginia	Atlantic	2022-09-29	Black Vulture	Non-host wild bird	Cluster 6	B1.1
USDA	22-032615-001	USA	Virginia	Atlantic	2022-09-30	Black Vulture	Non-host wild bird	Cluster 6	B1.1
USDA	22-032664-001	USA	Florida	Atlantic	2022-10-07	American wood stork	Non-host wild bird	Cluster 4	B2.2
USDA	22-032710-001	USA	Indiana	Mississippi	2022-10-07	Peregrine falcon	Non-host wild bird	Cluster 1	B3.2
USDA	22-032727-001	USA	South Carolina	Atlantic	Unknown	Vulture	Non-host wild bird	Cluster 6	B1.1
USDA	22-032745-002	USA	Minnesota	Mississippi	2022-08-25	Wood Duck	Waterfowl	Cluster 1	B3.2
USDA	22-032745-034	USA	Minnesota	Mississippi	2022-08-31	Mallard	Waterfowl	Cluster 5	B1.3
USDA	22-032745-038	USA	Minnesota	Mississippi	2022-09-02	Wood Duck	Waterfowl	Cluster 1	B3.2
USDA	22-032745-046	USA	Minnesota	Mississippi	2022-09-03	American Blue-winged teal	Waterfowl	Cluster 5	B1.3
USDA	22-032788-001	USA	New York	Atlantic	2022-10-12	Black Vulture	Non-host wild bird	Cluster 6	B1.1
USDA	22-032789-001	USA	New York	Atlantic	2022-10-12	Black Vulture	Non-host wild bird	Cluster 6	B1.1
USDA	22-032790-001	USA	New York	Atlantic	2022-10-12	Black Vulture	Non-host wild bird	Cluster 6	B1.1
USDA	22-032792-001	USA	New York	Atlantic	2022-10-12	Canada goose	Waterfowl	Cluster 4	B2.2
USDA	22-032793-001	USA	New York	Atlantic	2022-10-07	Canada goose	Waterfowl	Cluster 5	B1.3
USDA	22-032849-001	USA	Minnesota	Mississippi	2022-10-13	Peregrine falcon	Non-host wild bird	Cluster 1	B3.2
USDA	22-032849-002	USA	Minnesota	Mississippi	2022-10-13	Peregrine falcon	Non-host wild bird	Cluster 1	B3.2
USDA	22-032849-004	USA	Minnesota	Mississippi	2022-10-13	Red-tailed hawk	Non-host wild bird	Cluster 5	B1.3
USDA	22-032908-001	USA	Nebraska	Central	2022-10-13	Pelican	Sea/shore bird	Cluster 1	B3.2
USDA	22-032913-001	USA	California	Pacific	2022-10-11	Canada goose	Waterfowl	Cluster 4	B4.1
USDA	22-032915-001	USA	California	Pacific	2022-10-11	American white Pelican	Sea/shore bird	Cluster 4	B2.2
USDA	22-032916-001	USA	California	Pacific	2022-10-11	Goose	Waterfowl	Cluster 4	B4.1
USDA	22-032917-001	USA	California	Pacific	2022-10-06	Canada goose	Waterfowl	Cluster 2	B2.1
USDA	22-032917-002	USA	California	Pacific	2022-10-06	Canada goose	Waterfowl	Cluster 2	B2.1
USDA	22-032918-001	USA	California	Pacific	2022-10-06	Canada goose	Waterfowl	Cluster 2	B2.1
USDA	22-032919-004	USA	California	Pacific	2022-10-04	Black-Crowned night heron	Sea/shore bird	Cluster 2	B2.1
USDA	22-032921-001	USA	California	Pacific	2022-10-10	Goose	Waterfowl	Cluster 4	B4.1
USDA	22-032921-003	USA	California	Pacific	2022-10-10	Goose	Waterfowl	Cluster 4	B4.1
USDA	22-032921-004	USA	California	Pacific	2022-10-10	Goose	Waterfowl	Cluster 4	B4.1
USDA	22-032922-001	USA	California	Pacific	2022-10-12	Black Swan	Waterfowl	Cluster 1	B3.2
USDA	22-032924-001	USA	California	Pacific	2022-10-12	Canada goose	Waterfowl	Cluster 4	B4.1
USDA	22-032924-002	USA	California	Pacific	2022-10-12	Black-Crowned night heron	Sea/shore bird	Cluster 4	B4.1
USDA	22-032952-008	USA	Utah	Pacific	2022-10-13	Great horned owl	Non-host wild bird	Cluster 1	B3.2
USDA	22-032952-010	USA	Utah	Pacific	2022-10-13	American white Pelican	Sea/shore bird	Cluster 1	B3.2
USDA	22-032961-001	USA	Florida	Atlantic	2022-10-12	Cormorant	Sea/shore bird	Cluster 1	B3.2
USDA	22-032994-001	USA	Oklahoma	Central	2022-10-10	American white Pelican	Sea/shore bird	Cluster 4	B2.2
USDA	22-032994-002	USA	Oklahoma	Central	2022-10-10	American Blue-winged teal	Waterfowl	Cluster 1	B3.2
USDA	22-033000-001	USA	Oregon	Pacific	2022-09-28	Turkey Vulture	Non-host wild bird	Cluster 4	B4.1
USDA	22-033001-001	USA	Oregon	Pacific	2022-10-11	Great horned owl	Non-host wild bird	Cluster 1	B3.2
USDA	22-033002-001	USA	Oregon	Pacific	2022-09-28	Turkey Vulture	Non-host wild bird	Cluster 4	B4.1
USDA	22-033004-001	USA	Oregon	Pacific	2022-10-06	Canada goose	Waterfowl	Cluster 4	B4.1
USDA	22-033009-010	USA	Michigan	Mississippi	2022-10-08	Wood Duck	Waterfowl	Cluster 1	B3.3
USDA	22-033035-001	USA	Wyoming	Central	2022-10-12	Great horned owl	Non-host wild bird	Cluster 1	B3.2
USDA	22-033036-002	USA	Wyoming	Central	2022-10-12	Great horned owl	Non-host wild bird	Cluster 1	B3.2
USDA	22-033080-001	USA	Minnesota	Mississippi	2022-10-15	Great horned owl	Non-host wild bird	Cluster 5	B1.3
USDA	22-033108-001	USA	Texas	Central	Unknown	Raptor	Non-host wild bird	Cluster 4	B3.1
USDA	22-033111-001	USA	Idaho	Pacific	2022-09-08	Canada goose	Waterfowl	Cluster 4	B2.2
USDA	22-033187-001	USA	California	Pacific	2022-10-12	Red-tailed hawk	Non-host wild bird	Cluster 1	B3.2
USDA	22-033190-002	USA	Montana	Pacific	Unknown	Owl	Non-host wild bird	Cluster 1	B3.2
USDA	22-033260-001	USA	Michigan	Mississippi	Unknown	Bald eagle	Non-host wild bird	Cluster 5	B1.3
USDA	22-033260-003	USA	Michigan	Mississippi	Unknown	Herring Gull	Sea/shore bird	Cluster 6	B1.1
USDA	22-033366-001	USA	Wyoming	Central	2022-10-14	Canada goose	Waterfowl	Cluster 1	B3.2
USDA	22-033403-003	USA	Nevada	Pacific	Unknown	Canada goose	Waterfowl	Cluster 1	B3.2
USDA	22-033430-001	USA	Colorado	Central	2022-10-09	Bald eagle	Non-host wild bird	Cluster 3	A3
USDA	22-033430-002	USA	Colorado	Central	2022-10-09	Mallard	Waterfowl	Cluster 1	B3.2
USDA	22-033477-001	USA	Louisiana	Mississippi	Unknown	Blue-winged teal	Waterfowl	Cluster 5	B1.3
USDA	22-033477-002	USA	Louisiana	Mississippi	Unknown	Blue-winged teal	Waterfowl	Cluster 1	B3.2
USDA	22-033477-003	USA	Louisiana	Mississippi	Unknown	Blue-winged teal	Waterfowl	Cluster 1	B3.2
USDA	22-033477-004	USA	Louisiana	Mississippi	Unknown	Blue-winged teal	Waterfowl	Cluster 1	B3.2
USDA	22-033477-005	USA	Louisiana	Mississippi	Unknown	Blue-winged teal	Waterfowl	Cluster 1	B3.2
USDA	22-033477-008	USA	Louisiana	Mississippi	Unknown	Blue-winged teal	Waterfowl	Cluster 1	B3.2
USDA	22-033477-009	USA	Louisiana	Mississippi	Unknown	Blue-winged teal	Waterfowl	Cluster 1	B3.2
USDA	22-033477-011	USA	Louisiana	Mississippi	Unknown	Blue-winged teal	Waterfowl	Cluster 1	B3.2
USDA	22-033477-012	USA	Louisiana	Mississippi	Unknown	Blue-winged teal	Waterfowl	Cluster 5	B1.3
USDA	22-033477-013	USA	Louisiana	Mississippi	Unknown	Blue-winged teal	Waterfowl	Cluster 1	B3.2
USDA	22-033477-014	USA	Louisiana	Mississippi	Unknown	Blue-winged teal	Waterfowl	Cluster 1	B3.2
USDA	22-033477-017	USA	Louisiana	Mississippi	Unknown	Blue-winged teal	Waterfowl	Cluster 2	B2.1
USDA	22-033477-019	USA	Louisiana	Mississippi	Unknown	Blue-winged teal	Waterfowl	Cluster 1	B3.2
USDA	22-033477-020	USA	Louisiana	Mississippi	Unknown	Blue-winged teal	Waterfowl	Cluster 1	B3.2
USDA	22-033478-001	USA	Minnesota	Mississippi	Unknown	Blue-winged teal	Waterfowl	Cluster 5	B1.3
USDA	22-033478-002	USA	Minnesota	Mississippi	Unknown	Blue-winged teal	Waterfowl	Cluster 5	B1.3
USDA	22-033478-003	USA	Minnesota	Mississippi	Unknown	Mallard	Waterfowl	Cluster 5	B1.3
USDA	22-033478-004	USA	Minnesota	Mississippi	Unknown	Mallard	Waterfowl	Cluster 1	B3.2
USDA	22-033479-002	USA	Texas	Central	Unknown	Blue-winged teal	Waterfowl	Cluster 1	B3.2
USDA	22-033479-003	USA	Texas	Central	Unknown	Blue-winged teal	Waterfowl	Cluster 1	B3.3
USDA	22-033479-004	USA	Texas	Central	Unknown	Blue-winged teal	Waterfowl	Cluster 1	B3.2
USDA	22-033479-007	USA	Texas	Central	Unknown	Blue-winged teal	Waterfowl	Cluster 1	B3.2
USDA	22-033479-008	USA	Texas	Central	Unknown	Blue-winged teal	Waterfowl	Cluster 1	B3.2
USDA	22-033479-009	USA	Texas	Central	Unknown	Blue-winged teal	Waterfowl	Cluster 1	B3.2
USDA	22-033479-010	USA	Texas	Central	Unknown	Blue-winged teal	Waterfowl	Cluster 1	B3.2
USDA	22-033479-011	USA	Texas	Central	Unknown	Blue-winged teal	Waterfowl	Cluster 1	B3.2
USDA	22-033479-012	USA	Texas	Central	Unknown	Blue-winged teal	Waterfowl	Cluster 2	B2.1
USDA	22-033479-013	USA	Texas	Central	Unknown	Blue-winged teal	Waterfowl	Cluster 1	B3.3
USDA	22-033479-014	USA	Texas	Central	Unknown	Blue-winged teal	Waterfowl	Cluster 1	B3.2
USDA	22-033479-016	USA	Texas	Central	Unknown	Blue-winged teal	Waterfowl	Cluster 1	B3.2
USDA	22-033479-017	USA	Texas	Central	Unknown	Blue-winged teal	Waterfowl	Cluster 1	B3.2
USDA	22-033479-018	USA	Texas	Central	Unknown	Blue-winged teal	Waterfowl	Cluster 1	B3.2
USDA	22-033479-019	USA	Texas	Central	Unknown	Blue-winged teal	Waterfowl	Cluster 1	B3.2
USDA	22-033479-020	USA	Texas	Central	Unknown	Blue-winged teal	Waterfowl	Cluster 1	B3.2
USDA	22-033479-021	USA	Texas	Central	Unknown	Blue-winged teal	Waterfowl	Cluster 1	B3.2
USDA	22-033479-023	USA	Texas	Central	Unknown	Blue-winged teal	Waterfowl	Cluster 1	B3.2
USDA	22-033479-024	USA	Texas	Central	Unknown	Blue-winged teal	Waterfowl	Cluster 1	B3.2
USDA	22-033479-025	USA	Texas	Central	Unknown	Blue-winged teal	Waterfowl	Cluster 1	B3.2
USDA	22-033479-026	USA	Texas	Central	Unknown	Blue-winged teal	Waterfowl	Cluster 1	B3.2
USDA	22-033479-028	USA	Texas	Central	Unknown	Blue-winged teal	Waterfowl	Cluster 1	B3.2
USDA	22-033479-029	USA	Texas	Central	Unknown	Blue-winged teal	Waterfowl	Cluster 5	B1.3
USDA	22-033523-001	USA	North Carolina	Atlantic	2022-10-19	Vulture	Non-host wild bird	Cluster 6	B1.1
USDA	22-033523-002	USA	North Carolina	Atlantic	2022-10-19	Vulture	Non-host wild bird	Cluster 6	B1.1
USDA	22-033592-012	USA	New York	Atlantic	2022-10-15	American green-winged teal	Waterfowl	Cluster 4	B2.2
USDA	22-033592-029	USA	New York	Atlantic	2022-10-15	American green-winged teal	Waterfowl	Cluster 1	B3.2
USDA	22-033593-001	USA	New Jersey	Atlantic	2022-10-13	Black Vulture	Non-host wild bird	Cluster 6	B1.1
USDA	22-033594-001	USA	New Jersey	Atlantic	2022-10-13	Black Vulture	Non-host wild bird	Cluster 6	B1.1
USDA	22-033595-001	USA	New York	Atlantic	2022-10-15	Bald eagle	Non-host wild bird	Cluster 5	B1.3
USDA	22-033596-001	USA	New York	Atlantic	2022-10-14	Peregrine falcon	Non-host wild bird	Cluster 5	B1.3
USDA	22-033676-003	USA	New Jersey	Atlantic	2022-10-15	Mallard	Waterfowl	Cluster 5	B1.3
USDA	22-033689-005	USA	North Dakota	Central	2022-10-13	American wigeon	Waterfowl	Cluster 4	B2.2
USDA	22-033694-001	USA	Colorado	Central	2022-10-18	Great horned owl	Non-host wild bird	Cluster 1	B3.2
USDA	22-033695-001	USA	Colorado	Central	2022-10-18	Canada goose	Waterfowl	Cluster 1	B3.2
USDA	22-033696-001	USA	Connecticut	Atlantic	2022-10-21	Great horned owl	Non-host wild bird	Cluster 5	B1.3
USDA	22-033697-001	USA	Connecticut	Atlantic	2022-10-21	Cooper's Hawk	Non-host wild bird	Cluster 3	A1
USDA	22-033812-001	USA	Iowa	Mississippi	2022-10-20	Red-tailed hawk	Non-host wild bird	Cluster 5	B1.3
USDA	22-033859-002	USA	Montana	Pacific	2022-10-20	Canada goose	Waterfowl	Cluster 1	B3.2
USDA	22-033874-001	USA	Oregon	Pacific	2022-10-17	Wood Duck	Waterfowl	Cluster 4	B4.1
USDA	22-033876-004	USA	Oregon	Pacific	2022-10-15	American wigeon	Waterfowl	Cluster 1	B3.2
USDA	22-033876-019	USA	Oregon	Pacific	2022-10-15	American wigeon	Waterfowl	Cluster 1	B3.2
USDA	22-033877-003	USA	Oregon	Pacific	2022-10-16	American wigeon	Waterfowl	Cluster 1	B3.2
USDA	22-033877-019	USA	Oregon	Pacific	2022-10-16	American wigeon	Waterfowl	Cluster 1	B3.2
USDA	22-033885-001	USA	Nebraska	Central	2022-10-19	Sparrow	Non-host wild bird	Cluster 1	B3.2
USDA	22-033892-001	USA	Rhode Island	Atlantic	2022-10-17	Canada goose	Waterfowl	Cluster 5	B1.2
USDA	22-033893-001	USA	Connecticut	Atlantic	2022-10-19	Canada goose	Waterfowl	Cluster 5	B1.2
USDA	22-033922-001	USA	Florida	Atlantic	2022-10-19	Black Vulture	Non-host wild bird	Cluster 6	B1.1
USDA	22-033925-001	USA	Florida	Atlantic	2022-10-20	Black Vulture	Non-host wild bird	Cluster 6	B1.1
USDA	22-034017-001	USA	Georgia	Atlantic	Unknown	Black Vulture	Non-host wild bird	Cluster 6	B1.1
USDA	22-034017-002	USA	Georgia	Atlantic	Unknown	Black Vulture	Non-host wild bird	Cluster 6	B1.1
USDA	22-034017-003	USA	Georgia	Atlantic	Unknown	Black Vulture	Non-host wild bird	Cluster 6	B1.1
USDA	22-034017-004	USA	Georgia	Atlantic	Unknown	Black Vulture	Non-host wild bird	Cluster 6	B1.1
USDA	22-034017-005	USA	Georgia	Atlantic	Unknown	Black Vulture	Non-host wild bird	Cluster 6	B1.1
USDA	22-034017-006	USA	Georgia	Atlantic	Unknown	Black Vulture	Non-host wild bird	Cluster 6	B1.1
USDA	22-034030-001	USA	New York	Atlantic	2022-10-19	Bald eagle	Non-host wild bird	Cluster 5	B1.3
USDA	22-034044-001	USA	Washington	Pacific	2022-10-17	Canada goose	Waterfowl	Cluster 4	B4.1
USDA	22-034062-001	USA	New Jersey	Atlantic	2022-10-24	Swan	Waterfowl	Cluster 5	B1.3
USDA	22-034062-002	USA	New Jersey	Atlantic	2022-10-24	Swan	Waterfowl	Cluster 5	B1.3
USDA	22-034062-003	USA	New Jersey	Atlantic	2022-10-24	Swan	Waterfowl	Cluster 5	B1.3
USDA	22-034080-032	USA	Ohio	Mississippi	2022-10-15	American wigeon	Waterfowl	Cluster 1	B3.2
USDA	22-034080-051	USA	Ohio	Mississippi	2022-10-15	Mallard	Waterfowl	Cluster 5	B1.3
USDA	22-034094-004	USA	Alaska	Pacific	2022-09-18	American green-winged teal	Waterfowl	Cluster 4	B4.1
USDA	22-034097-002	USA	Alaska	Pacific	2022-10-01	American wigeon	Waterfowl	Cluster 1	B3.2
USDA	22-034097-007	USA	Alaska	Pacific	2022-10-01	American wigeon	Waterfowl	Cluster 3	A3
USDA	22-034128-001	USA	Arizona	Pacific	2022-10-17	Canada goose	Waterfowl	Cluster 1	B3.2
USDA	22-034146-001	USA	Oregon	Pacific	2022-10-10	Swainson's Hawk	Non-host wild bird	Cluster 1	B3.2
USDA	22-034199-001	USA	Minnesota	Mississippi	2022-10-10	Canada goose	Waterfowl	Cluster 5	B1.3
USDA	22-034304-005	USA	Iowa	Mississippi	2022-10-22	Blue-winged teal	Waterfowl	Cluster 1	B3.2
USDA	22-034322-001	USA	California	Pacific	2022-10-20	Cooper's Hawk	Non-host wild bird	Cluster 4	B4.1
USDA	22-034322-002	USA	California	Pacific	2022-10-20	Turkey Vulture	Non-host wild bird	Cluster 4	B4.1
USDA	22-034322-003	USA	California	Pacific	2022-10-20	Red-shouldered hawk	Non-host wild bird	Cluster 4	B4.1
USDA	22-034324-001	USA	California	Pacific	2022-10-20	Brown Pelican	Sea/shore bird	Cluster 4	B4.1
USDA	22-034325-001	USA	California	Pacific	2022-10-20	Canada goose	Waterfowl	Cluster 4	B4.1
USDA	22-034326-001	USA	California	Pacific	2022-10-20	Canada goose	Waterfowl	Cluster 4	B4.1
USDA	22-034327-001	USA	California	Pacific	2022-10-17	Goose	Waterfowl	Cluster 4	B4.1
USDA	22-034328-001	USA	California	Pacific	2022-10-19	Black-Crowned night-heron	Sea/shore bird	Cluster 4	B4.1
USDA	22-034331-001	USA	California	Pacific	2022-10-20	Muscovy Duck	Waterfowl	Cluster 1	B3.2
USDA	22-034331-003	USA	California	Pacific	2022-10-20	Muscovy Duck	Waterfowl	Cluster 1	B3.2
USDA	22-034331-004	USA	California	Pacific	2022-10-20	Muscovy Duck	Waterfowl	Cluster 1	B3.2
USDA	22-034332-003	USA	California	Pacific	2022-10-18	Great horned owl	Non-host wild bird	Cluster 2	B2.1
USDA	22-034332-004	USA	California	Pacific	2022-10-18	Peregrine falcon	Non-host wild bird	Cluster 4	B4.1
USDA	22-034533-007	USA	Idaho	Pacific	2022-10-01	American green-winged teal	Waterfowl	Cluster 1	B3.2
USDA	22-034580-001	USA	Wyoming	Central	2022-10-25	Great horned owl	Non-host wild bird	Cluster 4	B2.2
USDA	22-034677-012	USA	Oregon	Pacific	2022-10-08	American green-winged teal	Waterfowl	Cluster 1	B3.2
USDA	22-034677-018	USA	Oregon	Pacific	2022-10-08	American green-winged teal	Waterfowl	Cluster 4	B4.1
USDA	22-034677-037	USA	Oregon	Pacific	2022-10-08	Mallard	Waterfowl	Cluster 4	B4.1
USDA	22-034677-048	USA	Oregon	Pacific	2022-10-08	Northern pintail	Waterfowl	Cluster 1	B3.2
USDA	22-034677-053	USA	Oregon	Pacific	2022-10-08	American wigeon	Waterfowl	Cluster 1	B3.2
USDA	22-034677-056	USA	Oregon	Pacific	2022-10-08	American wigeon	Waterfowl	Cluster 1	B3.2
USDA	22-034829-003	USA	Indiana	Mississippi	2022-10-28	Blue-winged teal	Waterfowl	Cluster 1	B3.2
USDA	22-034829-007	USA	Indiana	Mississippi	2022-10-28	Mallard	Waterfowl	Cluster 1	B3.2
USDA	22-034858-001	USA	New York	Atlantic	2022-10-25	Barred owl	Non-host wild bird	Cluster 5	B1.3
USDA	22-034859-001	USA	New York	Atlantic	2022-10-27	Black Vulture	Non-host wild bird	Cluster 6	B1.1
USDA	22-034928-001	USA	Iowa	Mississippi	2022-10-16	American green-winged teal	Waterfowl	Cluster 1	B3.2
USDA	22-035404-002	USA	Illinois	Mississippi	2022-10-30	Mallard	Waterfowl	Cluster 1	B3.3
USDA	22-035434-001	USA	North Dakota	Central	2022-10-28	Red-tailed hawk	Non-host wild bird	Cluster 4	B2.2
USDA	22-035435-001	USA	Colorado	Central	2022-10-29	Canada goose	Waterfowl	Cluster 4	B2.2
USDA	22-035472-001	USA	South Carolina	Atlantic	2022-11-01	Black Vulture	Non-host wild bird	Cluster 6	B1.1
USDA	22-035478-001	USA	New York	Atlantic	2022-10-31	Canada goose	Waterfowl	Cluster 5	B1.3
USDA	22-035505-001	USA	Minnesota	Mississippi	2022-10-28	Red-tailed hawk	Non-host wild bird	Cluster 5	B1.3
USDA	22-035505-002	USA	Minnesota	Mississippi	2022-10-29	Turkey Vulture	Non-host wild bird	Cluster 1	B3.2
USDA	22-035512-002	USA	North Carolina	Atlantic	2022-10-29	American green-winged teal	Waterfowl	Cluster 5	B1.2
USDA	22-035514-001	USA	Florida	Atlantic	2022-10-29	Peregrine falcon	Non-host wild bird	Cluster 1	B3.2
USDA	22-035514-002	USA	Florida	Atlantic	2022-10-29	Peregrine falcon	Non-host wild bird	Cluster 1	B3.2
USDA	22-035515-001	USA	Florida	Atlantic	2022-11-01	Muscovy Duck	Waterfowl	Cluster 5	B1.3
USDA	22-035515-004	USA	Florida	Atlantic	2022-11-01	Muscovy Duck	Waterfowl	Cluster 5	B1.3
USDA	22-035515-008	USA	Florida	Atlantic	2022-11-01	Muscovy Duck	Waterfowl	Cluster 4	B3.1
USDA	22-035515-010	USA	Florida	Atlantic	2022-11-01	Canada goose	Waterfowl	Cluster 4	B3.1
USDA	22-035587-001	USA	Rhode Island	Atlantic	2022-11-01	Canada goose	Waterfowl	Cluster 5	B1.3
USDA	22-035595-002	USA	California	Pacific	2022-10-27	Great horned owl	Non-host wild bird	Cluster 1	B3.2
USDA	22-035596-001	USA	California	Pacific	2022-10-27	American white Pelican	Sea/shore bird	Cluster 1	B3.2
USDA	22-035599-001	USA	California	Pacific	2022-10-31	American white Pelican	Sea/shore bird	Cluster 4	B4.1
USDA	22-035710-001	USA	Wyoming	Central	2022-11-03	Great horned owl	Non-host wild bird	Cluster 2	B2.1
USDA	22-035724-001	USA	Illinois	Mississippi	2022-11-02	Canada goose	Waterfowl	Cluster 5	B1.3
USDA	22-035736-015	USA	Oregon	Pacific	2022-10-27	American wigeon	Waterfowl	Cluster 1	B3.2
USDA	22-035760-001	USA	California	Pacific	2022-10-28	Turkey Vulture	Non-host wild bird	Cluster 3	A3
USDA	22-035763-001	USA	Texas	Central	2022-10-11	Roseate spoonbill	Sea/shore bird	Cluster 1	B3.2
USDA	22-035805-001	USA	Minnesota	Mississippi	2022-11-02	Swan	Waterfowl	Cluster 5	B1.3
USDA	22-035805-002	USA	Minnesota	Mississippi	2022-11-02	Swan	Waterfowl	Cluster 5	B1.3
USDA	22-035805-003	USA	Minnesota	Mississippi	2022-11-02	Swan	Waterfowl	Cluster 5	B1.3
USDA	22-035805-004	USA	Minnesota	Mississippi	2022-11-02	Swan	Waterfowl	Cluster 5	B1.3
USDA	22-035805-005	USA	Minnesota	Mississippi	2022-11-02	Swan	Waterfowl	Cluster 5	B1.3
USDA	22-035819-002	USA	North Carolina	Atlantic	2022-11-02	Vulture	Non-host wild bird	Cluster 6	B1.1
USDA	22-035838-001	USA	Florida	Atlantic	2022-11-03	Black Vulture	Non-host wild bird	Cluster 6	B1.1
USDA	22-035838-002	USA	Florida	Atlantic	2022-11-03	Black Vulture	Non-host wild bird	Cluster 6	B1.1
USDA	22-035838-003	USA	Florida	Atlantic	2022-11-03	Black Vulture	Non-host wild bird	Cluster 6	B1.1
USDA	22-035838-004	USA	Florida	Atlantic	2022-11-03	Black Vulture	Non-host wild bird	Cluster 6	B1.1
USDA	22-035880-001	USA	California	Pacific	2022-11-01	Great horned owl	Non-host wild bird	Cluster 1	B3.2
USDA	22-035881-001	USA	California	Pacific	2022-11-02	Goose	Waterfowl	Cluster 2	B2.1
USDA	22-035882-001	USA	California	Pacific	2022-11-03	Western Gull	Sea/shore bird	Cluster 1	B3.2
USDA	22-035884-002	USA	California	Pacific	2022-11-03	Great horned owl	Non-host wild bird	Cluster 4	B4.1
USDA	22-035956-004	USA	Utah	Pacific	2022-10-25	Canada goose	Waterfowl	Cluster 4	B2.2
USDA	22-035956-005	USA	Utah	Pacific	2022-10-25	Canada goose	Waterfowl	Cluster 4	B2.2
USDA	22-035956-006	USA	Utah	Pacific	2022-10-25	Canada goose	Waterfowl	Cluster 4	B2.2
USDA	22-035956-007	USA	Utah	Pacific	2022-10-25	Great horned owl	Non-host wild bird	Cluster 1	B3.2
USDA	22-036111-001	USA	Wyoming	Central	2022-11-03	Canada goose	Waterfowl	Cluster 1	B3.2
USDA	22-036139-015	USA	Alaska	Pacific	2022-11-02	Mallard	Waterfowl	Cluster 1	B3.2
USDA	22-036139-029	USA	Alaska	Pacific	2022-11-02	Mallard	Waterfowl	Cluster 1	B3.2
USDA	22-036139-030	USA	Alaska	Pacific	2022-11-02	Mallard	Waterfowl	Cluster 4	B4.1
USDA	22-036139-032	USA	Alaska	Pacific	2022-11-02	Mallard	Waterfowl	Cluster 1	B3.2
USDA	22-036139-037	USA	Alaska	Pacific	2022-11-02	Mallard	Waterfowl	Cluster 1	B3.2
USDA	22-036139-058	USA	Alaska	Pacific	2022-11-02	Mallard	Waterfowl	Cluster 1	B3.2
USDA	22-036139-060	USA	Alaska	Pacific	2022-11-02	Mallard	Waterfowl	Cluster 4	B4.1
USDA	22-036139-062	USA	Alaska	Pacific	2022-11-02	Mallard	Waterfowl	Cluster 1	B3.2
USDA	22-036139-063	USA	Alaska	Pacific	2022-11-02	Mallard	Waterfowl	Cluster 1	B3.2
USDA	22-036139-081	USA	Alaska	Pacific	2022-11-02	Mallard	Waterfowl	Cluster 1	B3.2
USDA	22-036139-092	USA	Alaska	Pacific	2022-11-02	Mallard	Waterfowl	Cluster 1	B3.2
USDA	22-036180-002	USA	Maine	Atlantic	2022-06-24	Common eider	Waterfowl	Cluster 3	A2
USDA	22-036180-003	USA	Maine	Atlantic	2022-06-24	Northern Gannet	Sea/shore bird	Cluster 3	A2
USDA	22-036180-004	USA	Maine	Atlantic	2022-06-24	Great black-backed Gull	Sea/shore bird	Cluster 3	A2
USDA	22-036180-005	USA	Maine	Atlantic	2022-06-24	Great black-backed Gull	Sea/shore bird	Cluster 3	A2
USDA	22-036180-006	USA	Maine	Atlantic	2022-06-24	Herring Gull	Sea/shore bird	Cluster 3	A2
USDA	22-036180-007	USA	Maine	Atlantic	2022-06-24	Common eider	Waterfowl	Cluster 3	A2
USDA	22-036180-008	USA	Maine	Atlantic	2022-06-24	Common eider	Waterfowl	Cluster 3	A2
USDA	22-036180-009	USA	Maine	Atlantic	2022-06-24	Herring Gull	Sea/shore bird	Cluster 3	A2
USDA	22-036181-002	USA	Massachusetts	Atlantic	2022-06-26	Peregrine falcon	Non-host wild bird	Cluster 3	A1
USDA	22-036181-003	USA	Massachusetts	Atlantic	2022-06-26	Great horned owl	Non-host wild bird	Cluster 3	A1
USDA	22-036181-004	USA	Massachusetts	Atlantic	2022-06-26	Great horned owl	Non-host wild bird	Cluster 3	A1
USDA	22-036181-005	USA	Massachusetts	Atlantic	2022-06-26	Canada goose	Waterfowl	Cluster 5	B1.2
USDA	22-036181-007	USA	Massachusetts	Atlantic	2022-06-26	Canada goose	Waterfowl	Cluster 5	B1.2
USDA	22-036181-008	USA	Massachusetts	Atlantic	2022-06-26	Peregrine falcon	Non-host wild bird	Cluster 5	B1.3
USDA	22-036181-009	USA	Massachusetts	Atlantic	2022-06-26	Mute Swan	Waterfowl	Cluster 5	B1.2
USDA	22-036228-001	USA	New York	Atlantic	2022-11-04	Peregrine falcon	Non-host wild bird	Cluster 4	B2.2
USDA	22-036316-001	USA	Montana	Pacific	2022-11-09	Red-tailed hawk	Non-host wild bird	Cluster 1	B3.2
USDA	22-036345-003	USA	Montana	Pacific	2022-11-06	Tundra Swan	Waterfowl	Cluster 2	B2.1
USDA	22-036371-001	USA	Alabama	Mississippi	2022-11-07	Black Vulture	Non-host wild bird	Cluster 6	B1.1
USDA	22-036371-002	USA	Alabama	Mississippi	2022-11-07	Black Vulture	Non-host wild bird	Cluster 6	B1.1
USDA	22-036551-001	USA	Florida	Atlantic	2022-11-07	Turkey Vulture	Non-host wild bird	Cluster 6	B1.1
USDA	22-036551-002	USA	Florida	Atlantic	2022-11-07	Black Vulture	Non-host wild bird	Cluster 6	B1.1
USDA	22-036551-003	USA	Florida	Atlantic	2022-11-07	Black Vulture	Non-host wild bird	Cluster 6	B1.1
USDA	22-036552-001	USA	Florida	Atlantic	2022-11-03	Double-crested Cormorant	Sea/shore bird	Cluster 1	B3.2
USDA	22-036553-001	USA	Florida	Atlantic	2022-11-04	Black Vulture	Non-host wild bird	Cluster 6	B1.1
USDA	22-036614-001	USA	North Carolina	Atlantic	2022-11-09	Vulture	Non-host wild bird	Cluster 6	B1.1
USDA	22-036618-001	USA	Alaska	Pacific	2022-11-01	Thayer's Gull	Sea/shore bird	Cluster 3	A3
USDA	22-036619-001	USA	Washington	Pacific	2022-11-07	Bufflehead	Waterfowl	Cluster 4	B4.1
USDA	22-036621-002	USA	South Carolina	Atlantic	2022-11-02	Black Vulture	Non-host wild bird	Cluster 6	B1.1
USDA	22-036623-001	USA	North Carolina	Atlantic	2022-10-30	Canada goose	Waterfowl	Cluster 1	B3.2
USDA	22-036623-002	USA	North Carolina	Atlantic	2022-10-31	Black Vulture	Non-host wild bird	Cluster 6	B1.1
USDA	22-036623-003	USA	North Carolina	Atlantic	2022-10-31	Black Vulture	Non-host wild bird	Cluster 6	B1.1
USDA	22-036623-005	USA	North Carolina	Atlantic	2022-11-04	Black Vulture	Non-host wild bird	Cluster 6	B1.1
USDA	22-036624-001	USA	Kansas	Central	2022-10-17	Pelican	Sea/shore bird	Cluster 1	B3.2
USDA	22-036625-001	USA	Colorado	Central	2022-11-08	Snow goose	Waterfowl	Cluster 1	B3.2
USDA	22-036627-002	USA	Georgia	Atlantic	2022-10-21	Black Vulture	Non-host wild bird	Cluster 6	B1.1
USDA	22-036627-004	USA	Georgia	Atlantic	2022-11-02	Black Vulture	Non-host wild bird	Cluster 6	B1.1
USDA	22-036627-005	USA	Georgia	Atlantic	2022-11-02	Black Vulture	Non-host wild bird	Cluster 6	B1.1
USDA	22-036627-006	USA	Georgia	Atlantic	2022-11-03	Black Vulture	Non-host wild bird	Cluster 6	B1.1
USDA	22-036627-007	USA	Georgia	Atlantic	2022-11-03	Black Vulture	Non-host wild bird	Cluster 6	B1.1
USDA	22-036627-008	USA	Georgia	Atlantic	2022-11-03	Black Vulture	Non-host wild bird	Cluster 6	B1.1
USDA	22-036753-004	USA	Texas	Central	2022-11-05	Gadwall	Waterfowl	Cluster 1	B3.2
USDA	22-036753-014	USA	Texas	Central	2022-11-05	American wigeon	Waterfowl	Cluster 1	B3.2
USDA	22-036753-021	USA	Texas	Central	2022-11-05	Gadwall	Waterfowl	Cluster 1	B3.2
USDA	22-036753-025	USA	Texas	Central	2022-11-05	American wigeon	Waterfowl	Cluster 1	B3.2
USDA	22-036753-030	USA	Texas	Central	2022-11-05	American green-winged teal	Waterfowl	Cluster 1	B3.2
USDA	22-036753-038	USA	Texas	Central	2022-11-05	American wigeon	Waterfowl	Cluster 1	B3.2
USDA	22-036753-040	USA	Texas	Central	2022-11-05	Gadwall	Waterfowl	Cluster 1	B3.2
USDA	22-036753-054	USA	Texas	Central	2022-11-05	Gadwall	Waterfowl	Cluster 1	B3.2
USDA	22-036753-056	USA	Texas	Central	2022-11-05	American wigeon	Waterfowl	Cluster 1	B3.2
USDA	22-036753-074	USA	Texas	Central	2022-11-05	Gadwall	Waterfowl	Cluster 1	B3.2
USDA	22-036753-075	USA	Texas	Central	2022-11-05	Gadwall	Waterfowl	Cluster 1	B3.2
USDA	22-036753-082	USA	Texas	Central	2022-11-05	Gadwall	Waterfowl	Cluster 1	B3.2
USDA	22-036754-004	USA	Texas	Central	2022-11-06	American Blue-winged teal	Waterfowl	Cluster 1	B3.2
USDA	22-036754-036	USA	Texas	Central	2022-11-06	Gadwall	Waterfowl	Cluster 1	B3.2
USDA	22-036754-046	USA	Texas	Central	2022-11-06	Gadwall	Waterfowl	Cluster 1	B3.2
USDA	22-036754-057	USA	Texas	Central	2022-11-06	Gadwall	Waterfowl	Cluster 1	B3.2
USDA	22-036754-066	USA	Texas	Central	2022-11-06	Gadwall	Waterfowl	Cluster 1	B3.2
USDA	22-036755-019	USA	Kansas	Central	2022-11-05	Mallard	Waterfowl	Cluster 4	B2.2
USDA	22-036762-002	USA	Minnesota	Mississippi	2022-11-14	Ring-necked duck	Waterfowl	Cluster 5	B1.3
USDA	22-036798-001	USA	Arkansas	Mississippi	2022-11-14	Goose	Waterfowl	Cluster 1	B3.2
USDA	22-036873-001	USA	Idaho	Pacific	2022-10-26	American wigeon	Waterfowl	Cluster 1	B3.2
USDA	22-036876-001	USA	Oregon	Pacific	2022-10-24	Canada goose	Waterfowl	Cluster 4	B4.1
USDA	22-036878-001	USA	Oregon	Pacific	2022-10-02	Cackling Goose	Waterfowl	Cluster 1	B3.2
USDA	22-036880-012	USA	Oregon	Pacific	2022-11-07	American wigeon	Waterfowl	Cluster 1	B3.2
USDA	22-036880-048	USA	Oregon	Pacific	2022-11-07	Mallard	Waterfowl	Cluster 1	B3.2
USDA	22-036880-083	USA	Oregon	Pacific	2022-11-07	Northern shoveler	Waterfowl	Cluster 1	B3.2
USDA	22-036966-001	USA	Florida	Atlantic	Unknown	black skimmer	Sea/shore bird	Cluster 1	B3.2
USDA	22-036966-002	USA	Florida	Atlantic	Unknown	Muscovy Duck	Waterfowl	Cluster 1	B3.2
USDA	22-036968-001	USA	Florida	Atlantic	2022-11-12	Fish Crow	Non-host wild bird	Cluster 5	B1.3
USDA	22-036968-002	USA	Florida	Atlantic	2022-11-12	Fish Crow	Non-host wild bird	Cluster 5	B1.3
USDA	22-036968-003	USA	Florida	Atlantic	2022-11-12	Brown Pelican	Sea/shore bird	Cluster 5	B1.3
USDA	22-036968-004	USA	Florida	Atlantic	2022-11-12	Fish Crow	Non-host wild bird	Cluster 5	B1.3
USDA	22-037161-001	USA	Alabama	Mississippi	2022-11-16	Black Vulture	Non-host wild bird	Cluster 6	B1.1
USDA	22-037171-001	USA	Utah	Pacific	2022-11-08	Gull	Sea/shore bird	Cluster 4	B2.2
USDA	22-037174-001	USA	Washington	Pacific	2022-10-01	Peregrine falcon	Non-host wild bird	Cluster 4	B4.1
USDA	22-037213-001	USA	Colorado	Central	2022-11-14	Red-tailed hawk	Non-host wild bird	Cluster 1	B3.2
USDA	22-037214-001	USA	Colorado	Central	2022-11-14	Great horned owl	Non-host wild bird	Cluster 4	B2.2
USDA	22-037236-004	USA	Louisiana	Mississippi	2022-11-12	Northern shoveler	Waterfowl	Cluster 1	B3.2
USDA	22-037240-001	USA	Louisiana	Mississippi	2022-11-13	Gadwall	Waterfowl	Cluster 4	B2.2
USDA	22-037240-002	USA	Louisiana	Mississippi	2022-11-13	Gadwall	Waterfowl	Cluster 1	B3.2
USDA	22-037240-003	USA	Louisiana	Mississippi	2022-11-13	lesser scaup	Waterfowl	Cluster 1	B3.2
USDA	22-037259-001	USA	Oregon	Pacific	2022-11-14	Cackling Goose	Waterfowl	Cluster 1	B3.2
USDA	22-037260-001	USA	Oregon	Pacific	2022-11-02	Canada goose	Waterfowl	Cluster 1	B3.2
USDA	22-037261-001	USA	Oregon	Pacific	2022-11-10	Cackling Goose	Waterfowl	Cluster 4	B4.1
USDA	22-037263-001	USA	Oregon	Pacific	2022-11-10	Cackling Goose	Waterfowl	Cluster 1	B3.2
USDA	22-037268-011	USA	Oregon	Pacific	2022-11-12	American green-winged teal	Waterfowl	Cluster 1	B3.2
USDA	22-037438-001	USA	Minnesota	Mississippi	2022-11-17	Trumpeter Swan	Waterfowl	Cluster 1	B3.2
USDA	22-037439-001	USA	Minnesota	Mississippi	2022-11-17	Snow goose	Waterfowl	Cluster 1	B3.2
USDA	22-037504-001	USA	California	Pacific	2022-11-14	Goose	Waterfowl	Cluster 4	B4.1
USDA	22-037507-001	USA	California	Pacific	2022-11-09	Canada goose	Waterfowl	Cluster 4	B4.1
USDA	22-037512-001	USA	California	Pacific	2022-11-08	Western Gull	Sea/shore bird	Cluster 1	B3.2
USDA	22-037513-001	USA	California	Pacific	2022-11-07	Goose	Waterfowl	Cluster 2	B2.1
USDA	22-037516-001	USA	California	Pacific	2022-11-06	Cormorant	Sea/shore bird	Cluster 1	B3.2
USDA	22-037517-003	USA	Nevada	Pacific	2022-11-05	Northern shoveler	Waterfowl	Cluster 1	B3.2
USDA	22-037519-001	USA	California	Pacific	2022-11-04	Pelican	Sea/shore bird	Cluster 1	B3.2
USDA	22-037519-002	USA	California	Pacific	2022-11-04	Horned grebe	Waterfowl	Cluster 4	B4.1
USDA	22-037528-001	USA	South Dakota	Central	2022-11-14	Canada goose	Waterfowl	Cluster 1	B3.2
USDA	22-037528-002	USA	South Dakota	Central	2022-11-14	Canada goose	Waterfowl	Cluster 1	B3.2
USDA	22-037529-001	USA	South Dakota	Central	2022-11-18	Snow goose	Waterfowl	Cluster 6	Minor19
USDA	22-037628-001	USA	Minnesota	Mississippi	Unknown	Tundra Swan	Waterfowl	Cluster 1	B3.2
USDA	22-037628-002	USA	Minnesota	Mississippi	Unknown	Snow goose	Waterfowl	Cluster 1	B3.2
USDA	22-037628-003	USA	Minnesota	Mississippi	Unknown	Snow goose	Waterfowl	Cluster 4	B2.2
USDA	22-037628-004	USA	Minnesota	Mississippi	Unknown	Snow goose	Waterfowl	Cluster 1	B3.2
USDA	22-037628-005	USA	Minnesota	Mississippi	Unknown	Snow goose	Waterfowl	Cluster 1	B3.4
USDA	22-037634-001	USA	Florida	Atlantic	2022-11-15	Turkey Vulture	Non-host wild bird	Cluster 6	B1.1
USDA	22-037636-001	USA	Washington	Pacific	2022-11-15	Snow goose	Waterfowl	Cluster 1	B3.2
USDA	22-037636-002	USA	Washington	Pacific	2022-11-15	Canada goose	Waterfowl	Cluster 4	B4.1
USDA	22-037636-003	USA	Washington	Pacific	2022-11-15	American crow	Non-host wild bird	Cluster 3	A3
USDA	22-037656-001	USA	Alaska	Pacific	2022-11-08	Raven	Non-host wild bird	Cluster 3	A3
USDA	22-037656-002	USA	Alaska	Pacific	2022-11-09	Raven	Non-host wild bird	Cluster 3	A3
USDA	22-037656-003	USA	Alaska	Pacific	2022-11-11	Raven	Non-host wild bird	Cluster 3	A3
USDA	22-037657-001	USA	Washington	Pacific	2022-11-16	Cackling Goose	Waterfowl	Cluster 1	B3.2
USDA	22-037658-001	USA	Washington	Pacific	2022-11-16	Red-tailed hawk	Non-host wild bird	Cluster 1	B3.2
USDA	22-037665-001	USA	North Carolina	Atlantic	2022-11-17	Vulture	Non-host wild bird	Cluster 6	B1.1
USDA	22-037670-001	USA	Colorado	Central	2022-11-16	Snow goose	Waterfowl	Cluster 1	B3.2
USDA	22-037698-001	USA	Tennessee	Mississippi	2022-11-16	Black Vulture	Non-host wild bird	Cluster 6	B1.1
USDA	22-037715-001	USA	Oregon	Pacific	2022-11-17	Rough-legged Hawk	Non-host wild bird	Cluster 4	B4.1
USDA	22-037719-001	USA	Oregon	Pacific	2022-11-08	lesser snow goose	Waterfowl	Cluster 1	B3.2
USDA	22-037722-001	USA	Oregon	Pacific	2022-11-17	Canada goose	Waterfowl	Cluster 1	B3.2
USDA	22-037778-002	USA	North Carolina	Atlantic	2022-11-13	Black Vulture	Non-host wild bird	Cluster 6	B1.1
USDA	22-037778-003	USA	North Carolina	Atlantic	2022-11-13	Muscovy Duck	Waterfowl	Cluster 4	B2.2
USDA	22-037779-001	USA	Georgia	Atlantic	2022-11-10	Black Vulture	Non-host wild bird	Cluster 6	B1.1
USDA	22-037779-002	USA	Georgia	Atlantic	2022-11-04	Black Vulture	Non-host wild bird	Cluster 6	B1.1
USDA	22-037779-003	USA	Georgia	Atlantic	2022-11-04	Black Vulture	Non-host wild bird	Cluster 6	B1.1
USDA	22-037787-001	USA	Missouri	Mississippi	2022-11-13	Snow goose	Waterfowl	Cluster 1	B3.2
USDA	22-037797-001	USA	Iowa	Mississippi	2022-10-22	Ring-necked duck	Waterfowl	Cluster 5	B1.3
USDA	22-037799-001	USA	Missouri	Mississippi	2022-11-15	Canada goose	Waterfowl	Cluster 4	B2.2
USDA	22-037824-001	USA	Colorado	Central	2022-11-18	Red-tailed hawk	Non-host wild bird	Cluster 1	B3.2
USDA	22-037824-002	USA	Colorado	Central	2022-11-18	Red-tailed hawk	Non-host wild bird	Cluster 4	B2.2
USDA	22-038202-001	USA	Arkansas	Mississippi	2022-11-25	Snow goose	Waterfowl	Cluster 1	B3.2
USDA	22-038205-001	USA	Florida	Atlantic	2022-11-01	Black Vulture	Non-host wild bird	Cluster 6	B1.1
USDA	22-038234-001	USA	Arizona	Pacific	2022-10-15	Pelican	Sea/shore bird	Cluster 1	B3.2
USDA	22-038234-002	USA	Arizona	Pacific	2022-10-15	Pelican	Sea/shore bird	Cluster 1	B3.2
USDA	22-038234-003	USA	Arizona	Pacific	2022-10-15	Pelican	Sea/shore bird	Cluster 1	B3.2
USDA	22-038234-004	USA	Arizona	Pacific	2022-10-15	Pelican	Sea/shore bird	Cluster 1	B3.2
USDA	22-038234-005	USA	Arizona	Pacific	2022-10-15	Pelican	Sea/shore bird	Cluster 1	B3.2
USDA	22-038236-001	USA	Texas	Central	2022-11-23	Goose	Waterfowl	Cluster 1	B3.2
USDA	22-038267-001	USA	Mississippi	Mississippi	2022-11-21	Ross's goose	Waterfowl	Cluster 6	Minor28
USDA	22-038368-001	USA	Kentucky	Mississippi	2022-11-27	Snow goose	Waterfowl	Cluster 4	B2.2
USDA	22-038370-001	USA	Wisconsin	Mississippi	2022-11-26	Swan	Waterfowl	Cluster 5	B1.2
USDA	22-038418-001	USA	Washington	Pacific	2022-11-15	Great horned owl	Non-host wild bird	Cluster 1	B3.2
USDA	22-038440-002	USA	Georgia	Atlantic	2022-11-20	American Blue-winged teal	Waterfowl	Cluster 5	B1.2
USDA	22-038443-007	USA	Georgia	Atlantic	2022-11-19	American green-winged teal	Waterfowl	Cluster 1	B3.2
USDA	22-038527-001	USA	Oregon	Pacific	2022-11-17	Snow goose	Waterfowl	Cluster 1	B3.2
USDA	22-038528-001	USA	Oregon	Pacific	2022-11-18	Red-tailed hawk	Non-host wild bird	Cluster 3	A3
USDA	22-038546-001	USA	South Dakota	Central	2022-11-21	Snow goose	Waterfowl	Cluster 1	B3.2
USDA	22-038557-001	USA	Missouri	Mississippi	2022-11-18	Brant	Waterfowl	Cluster 4	B2.2
USDA	22-038557-003	USA	Missouri	Mississippi	2022-11-18	Canada goose	Waterfowl	Cluster 6	Minor19
USDA	22-038557-004	USA	Missouri	Mississippi	2022-11-18	Snow goose	Waterfowl	Cluster 4	B2.2
USDA	22-038564-002	USA	Missouri	Mississippi	2022-11-23	Snow goose	Waterfowl	Cluster 1	B3.2
USDA	22-038564-003	USA	Missouri	Mississippi	2022-11-23	Snow goose	Waterfowl	Cluster 4	B2.2
USDA	22-038564-005	USA	Missouri	Mississippi	2022-11-23	Snow goose	Waterfowl	Cluster 4	B2.2
USDA	22-038573-010	USA	Virginia	Atlantic	2022-11-19	American black Duck	Waterfowl	Cluster 1	B3.2
USDA	22-038579-001	USA	Virginia	Atlantic	2022-11-25	American green-winged teal	Waterfowl	Cluster 1	B3.2
USDA	22-038592-004	USA	Kansas	Central	2022-11-21	Waterfowl	Waterfowl	Cluster 4	B2.2
USDA	22-038592-005	USA	Kansas	Central	2022-11-21	Ross's goose	Waterfowl	Cluster 1	B3.2
USDA	22-038611-001	USA	Idaho	Pacific	2022-11-18	Snow goose	Waterfowl	Cluster 1	B3.2
USDA	22-038611-002	USA	Idaho	Pacific	2022-11-18	Snow goose	Waterfowl	Cluster 1	B3.2
USDA	22-038652-001	USA	Colorado	Central	2022-11-22	Red-tailed hawk	Non-host wild bird	Cluster 6	Minor25
USDA	22-038652-002	USA	Colorado	Central	2022-11-22	Red-tailed hawk	Non-host wild bird	Cluster 1	B3.6
USDA	22-038652-003	USA	Colorado	Central	2022-11-22	Great horned owl	Non-host wild bird	Cluster 1	B3.2
USDA	22-038655-001	USA	Colorado	Central	2022-11-28	Canada goose	Waterfowl	Cluster 1	B3.2
USDA	22-038658-001	USA	Colorado	Central	2022-11-28	Bald eagle	Non-host wild bird	Cluster 3	A3
USDA	22-038703-001	USA	New York	Atlantic	2022-11-23	Bald eagle	Non-host wild bird	Cluster 5	B1.3
USDA	22-038743-001	USA	Kentucky	Mississippi	Unknown	Canada goose	Waterfowl	Cluster 5	B1.3
USDA	22-038785-001	USA	Oregon	Pacific	2022-10-25	Western snowy plover	Sea/shore bird	Cluster 1	B3.2
USDA	22-038788-002	USA	South Dakota	Central	2022-11-21	Snow goose	Waterfowl	Cluster 1	B3.2
USDA	22-038788-003	USA	South Dakota	Central	2022-11-21	Snow goose	Waterfowl	Cluster 4	B2.2
USDA	22-038800-001	USA	Nebraska	Central	2022-11-30	Great horned owl	Non-host wild bird	Cluster 1	B3.2
USDA	22-038802-001	USA	Nebraska	Central	Unknown	Snow goose	Waterfowl	Cluster 4	B2.2
USDA	22-038802-002	USA	Nebraska	Central	Unknown	Snow goose	Waterfowl	Cluster 4	B2.2
USDA	22-038802-003	USA	Nebraska	Central	Unknown	Snow goose	Waterfowl	Cluster 4	B2.2
USDA	22-038802-004	USA	Nebraska	Central	Unknown	Snow goose	Waterfowl	Cluster 1	B3.4
USDA	22-038820-002	USA	Mississippi	Mississippi	2022-11-27	Snow goose	Waterfowl	Cluster 1	B3.2
USDA	22-038820-003	USA	Mississippi	Mississippi	2022-11-27	Snow goose	Waterfowl	Cluster 4	B2.2
USDA	22-038820-004	USA	Mississippi	Mississippi	2022-11-27	Snow goose	Waterfowl	Cluster 4	B2.2
USDA	22-038820-006	USA	Mississippi	Mississippi	2022-11-27	Snow goose	Waterfowl	Cluster 1	B3.2
USDA	22-038820-008	USA	Mississippi	Mississippi	2022-11-27	Snow goose	Waterfowl	Cluster 4	B2.2
USDA	22-038820-010	USA	Mississippi	Mississippi	2022-11-27	Rosss Goose	Waterfowl	Cluster 4	B2.2
USDA	22-038821-004	USA	Mississippi	Mississippi	2022-11-23	Snow goose	Waterfowl	Cluster 1	B3.2
USDA	22-038821-005	USA	Mississippi	Mississippi	2022-11-23	Snow goose	Waterfowl	Cluster 4	B2.2
USDA	22-038821-007	USA	Mississippi	Mississippi	2022-11-23	Snow goose	Waterfowl	Cluster 1	B3.4
USDA	22-038821-008	USA	Mississippi	Mississippi	2022-11-23	Snow goose	Waterfowl	Cluster 1	B3.2
USDA	22-038821-010	USA	Mississippi	Mississippi	2022-11-23	Snow goose	Waterfowl	Cluster 1	B3.2
USDA	22-038821-011	USA	Mississippi	Mississippi	2022-11-23	Snow goose	Waterfowl	Cluster 1	B3.2
USDA	22-038821-012	USA	Mississippi	Mississippi	2022-11-23	Snow goose	Waterfowl	Cluster 1	B3.2
USDA	22-038821-013	USA	Mississippi	Mississippi	2022-11-23	Snow goose	Waterfowl	Cluster 1	B3.2
USDA	22-038821-016	USA	Mississippi	Mississippi	2022-11-23	Snow goose	Waterfowl	Cluster 4	B2.2
USDA	22-038821-019	USA	Mississippi	Mississippi	2022-11-23	Snow goose	Waterfowl	Cluster 1	B3.2
USDA	22-038821-021	USA	Mississippi	Mississippi	2022-11-23	Snow goose	Waterfowl	Cluster 4	B2.2
USDA	22-038821-022	USA	Mississippi	Mississippi	2022-11-23	Snow goose	Waterfowl	Cluster 4	B2.2
USDA	22-038821-023	USA	Mississippi	Mississippi	2022-11-23	Snow goose	Waterfowl	Cluster 1	B3.2
USDA	22-038821-024	USA	Mississippi	Mississippi	2022-11-23	Snow goose	Waterfowl	Cluster 1	B3.2
USDA	22-038821-025	USA	Mississippi	Mississippi	2022-11-23	Snow goose	Waterfowl	Cluster 1	B3.2
USDA	22-038821-026	USA	Mississippi	Mississippi	2022-11-23	Snow goose	Waterfowl	Cluster 1	B3.2
USDA	22-038821-028	USA	Mississippi	Mississippi	2022-11-23	Snow goose	Waterfowl	Cluster 1	B3.4
USDA	22-038821-029	USA	Mississippi	Mississippi	2022-11-23	Snow goose	Waterfowl	Cluster 4	B2.2
USDA	22-038821-030	USA	Mississippi	Mississippi	2022-11-23	Snow goose	Waterfowl	Cluster 1	B3.2
USDA	22-038821-032	USA	Mississippi	Mississippi	2022-11-23	Snow goose	Waterfowl	Cluster 4	B2.2
USDA	22-038821-034	USA	Mississippi	Mississippi	2022-11-23	Snow goose	Waterfowl	Cluster 4	B2.2
USDA	22-038821-038	USA	Mississippi	Mississippi	2022-11-23	Snow goose	Waterfowl	Cluster 4	B2.2
USDA	22-038821-039	USA	Mississippi	Mississippi	2022-11-23	Snow goose	Waterfowl	Cluster 1	B3.2
USDA	22-038821-042	USA	Mississippi	Mississippi	2022-11-23	Snow goose	Waterfowl	Cluster 1	B3.2
USDA	22-038821-044	USA	Mississippi	Mississippi	2022-11-23	Snow goose	Waterfowl	Cluster 1	B3.2
USDA	22-038821-048	USA	Mississippi	Mississippi	2022-11-23	Snow goose	Waterfowl	Cluster 4	B2.2
USDA	22-038821-049	USA	Mississippi	Mississippi	2022-11-23	Snow goose	Waterfowl	Cluster 4	B2.2
USDA	22-038821-051	USA	Mississippi	Mississippi	2022-11-23	Snow goose	Waterfowl	Cluster 1	B3.2
USDA	22-038821-052	USA	Mississippi	Mississippi	2022-11-23	Snow goose	Waterfowl	Cluster 4	B2.2
USDA	22-038821-053	USA	Mississippi	Mississippi	2022-11-23	Snow goose	Waterfowl	Cluster 4	B2.2
USDA	22-038821-055	USA	Mississippi	Mississippi	2022-11-23	Ross's goose	Waterfowl	Cluster 4	B2.2
USDA	22-038821-056	USA	Mississippi	Mississippi	2022-11-23	Ross's goose	Waterfowl	Cluster 4	B2.2
USDA	22-038827-002	USA	Indiana	Mississippi	2022-11-23	Snow goose	Waterfowl	Cluster 1	B3.2
USDA	22-038827-003	USA	Indiana	Mississippi	2022-11-23	Snow goose	Waterfowl	Cluster 1	B3.2
USDA	22-038827-004	USA	Indiana	Mississippi	2022-11-23	Snow goose	Waterfowl	Cluster 4	B2.2
USDA	22-038827-005	USA	Indiana	Mississippi	2022-11-23	Snow goose	Waterfowl	Cluster 1	B3.2
USDA	22-038827-007	USA	Indiana	Mississippi	2022-11-23	Snow goose	Waterfowl	Cluster 1	B3.2
USDA	22-038827-008	USA	Indiana	Mississippi	2022-11-23	Snow goose	Waterfowl	Cluster 1	B3.2
USDA	22-038827-009	USA	Indiana	Mississippi	2022-11-23	Snow goose	Waterfowl	Cluster 4	B2.2
USDA	22-038827-010	USA	Indiana	Mississippi	2022-11-23	Snow goose	Waterfowl	Cluster 4	B2.2
USDA	22-038828-001	USA	Wisconsin	Mississippi	2022-11-22	Tundra Swan	Waterfowl	Cluster 1	B3.2
USDA	22-038929-003	USA	Colorado	Central	2022-11-28	Red-tailed hawk	Non-host wild bird	Cluster 3	A1
USDA	22-039077-001	USA	Wyoming	Central	2022-11-29	Canada goose	Waterfowl	Cluster 1	B3.5
USDA	22-039095-002	USA	Washington	Pacific	2022-11-25	Mallard	Waterfowl	Cluster 1	B3.2
USDA	22-039189-004	USA	Florida	Atlantic	2022-11-19	American green-winged teal	Waterfowl	Cluster 5	B1.3
USDA	22-039347-002	USA	Tennessee	Mississippi	2022-11-29	Black Vulture	Non-host wild bird	Cluster 6	B1.1
USDA	22-039347-003	USA	Tennessee	Mississippi	2022-11-29	Black Vulture	Non-host wild bird	Cluster 6	B1.1
USDA	22-039352-002	USA	Mississippi	Mississippi	2022-11-30	Black Vulture	Non-host wild bird	Cluster 5	B1.3
USDA	22-039352-003	USA	Mississippi	Mississippi	2022-11-30	Black Vulture	Non-host wild bird	Cluster 5	B1.3
USDA	22-039352-004	USA	Mississippi	Mississippi	2022-11-30	Black Vulture	Non-host wild bird	Cluster 5	B1.3
USDA	22-039352-005	USA	Mississippi	Mississippi	2022-11-30	Black Vulture	Non-host wild bird	Cluster 5	B1.3
USDA	22-039352-006	USA	Mississippi	Mississippi	2022-11-30	Black Vulture	Non-host wild bird	Cluster 5	B1.3
USDA	22-039352-007	USA	Mississippi	Mississippi	2022-11-30	Black Vulture	Non-host wild bird	Cluster 5	B1.3
USDA	22-039352-008	USA	Mississippi	Mississippi	2022-11-30	Black Vulture	Non-host wild bird	Cluster 5	B1.3
USDA	22-039352-009	USA	Mississippi	Mississippi	2022-11-30	Black Vulture	Non-host wild bird	Cluster 5	B1.3
USDA	22-039352-011	USA	Mississippi	Mississippi	2022-11-30	Black Vulture	Non-host wild bird	Cluster 5	B1.3
USDA	22-039352-014	USA	Mississippi	Mississippi	2022-11-30	Black Vulture	Non-host wild bird	Cluster 5	B1.3
USDA	22-039352-015	USA	Mississippi	Mississippi	2022-11-30	Black Vulture	Non-host wild bird	Cluster 5	B1.3
USDA	22-039352-016	USA	Mississippi	Mississippi	2022-11-30	Black Vulture	Non-host wild bird	Cluster 5	B1.3
USDA	22-039352-017	USA	Mississippi	Mississippi	2022-11-30	Black Vulture	Non-host wild bird	Cluster 5	B1.3
USDA	22-039352-020	USA	Mississippi	Mississippi	2022-11-30	Black Vulture	Non-host wild bird	Cluster 5	B1.3
USDA	22-039392-001	USA	Louisiana	Mississippi	2022-11-28	Snow goose	Waterfowl	Cluster 1	B3.2
USDA	22-039392-002	USA	Louisiana	Mississippi	2022-11-28	Goose	Waterfowl	Cluster 4	B2.2
USDA	22-039392-003	USA	Louisiana	Mississippi	2022-11-28	Northern pintail	Waterfowl	Cluster 1	B3.2
USDA	22-039394-001	USA	Vermont	Atlantic	2022-11-28	Canada goose	Waterfowl	Cluster 5	B1.3
USDA	22-039394-002	USA	Vermont	Atlantic	2022-11-28	Canada goose	Waterfowl	Cluster 5	B1.3
USDA	22-039418-001	USA	New York	Atlantic	2022-11-30	Canada goose	Waterfowl	Cluster 5	B1.3
USDA	22-039436-005	USA	Arkansas	Mississippi	Unknown	Snow goose	Waterfowl	Cluster 1	B3.2
USDA	22-039436-012	USA	Arkansas	Mississippi	Unknown	Snow goose	Waterfowl	Cluster 1	B3.2
USDA	22-039438-001	USA	Alaska	Pacific	2022-09-02	Northern pintail	Waterfowl	Cluster 1	B3.2
USDA	22-039438-003	USA	Alaska	Pacific	2022-09-05	Cackling Goose	Waterfowl	Cluster 1	B3.2
USDA	22-039438-004	USA	Alaska	Pacific	2022-09-05	Cackling Goose	Waterfowl	Cluster 1	B3.2
USDA	22-039438-005	USA	Alaska	Pacific	2022-09-07	Northern pintail	Waterfowl	Cluster 1	B3.2
USDA	22-039438-007	USA	Alaska	Pacific	2022-09-07	American green-winged teal	Waterfowl	Cluster 1	B3.2
USDA	22-039438-008	USA	Alaska	Pacific	2022-09-09	Northern pintail	Waterfowl	Cluster 1	B3.2
USDA	22-039438-009	USA	Alaska	Pacific	2022-09-09	Northern pintail	Waterfowl	Cluster 1	B3.2
USDA	22-039438-010	USA	Alaska	Pacific	2022-09-09	Northern pintail	Waterfowl	Cluster 1	B3.2
USDA	22-039438-011	USA	Alaska	Pacific	2022-09-09	Northern pintail	Waterfowl	Cluster 1	B3.2
USDA	22-039438-012	USA	Alaska	Pacific	2022-09-09	Cackling Goose	Waterfowl	Cluster 1	B3.2
USDA	22-039438-013	USA	Alaska	Pacific	2022-09-12	Northern pintail	Waterfowl	Cluster 1	B3.2
USDA	22-039438-014	USA	Alaska	Pacific	2022-09-12	Northern pintail	Waterfowl	Cluster 1	B3.2
USDA	22-039438-017	USA	Alaska	Pacific	2022-09-14	Northern pintail	Waterfowl	Cluster 1	B3.2
USDA	22-039438-018	USA	Alaska	Pacific	2022-09-14	Northern pintail	Waterfowl	Cluster 1	B3.2
USDA	22-039438-020	USA	Alaska	Pacific	2022-09-14	Northern pintail	Waterfowl	Cluster 3	A3
USDA	22-039438-021	USA	Alaska	Pacific	2022-09-14	Northern pintail	Waterfowl	Cluster 3	A3
USDA	22-039597-001	USA	Wyoming	Central	2022-12-06	Great horned owl	Non-host wild bird	Cluster 1	B3.2
USDA	22-039598-001	USA	Idaho	Pacific	2022-11-23	American wigeon	Waterfowl	Cluster 1	B3.2
USDA	22-039677-001	USA	Kansas	Central	2022-12-01	Ross's goose	Waterfowl	Cluster 4	B2.2
USDA	22-039678-001	USA	Washington	Pacific	2022-11-21	Snow goose	Waterfowl	Cluster 1	B3.2
USDA	22-039678-002	USA	Washington	Pacific	2022-11-21	Dunlin	Sea/shore bird	Cluster 1	B3.2
USDA	22-039678-003	USA	Washington	Pacific	2022-11-21	Great blue heron	Sea/shore bird	Cluster 4	B4.1
USDA	22-039678-004	USA	Washington	Pacific	2022-11-21	Short-eared Owl	Non-host wild bird	Cluster 1	B3.2
USDA	22-039688-004	USA	Louisiana	Mississippi	2022-11-28	Snow goose	Waterfowl	Cluster 1	B3.2
USDA	22-039688-005	USA	Louisiana	Mississippi	2022-11-28	Snow goose	Waterfowl	Cluster 4	B2.2
USDA	22-039688-006	USA	Louisiana	Mississippi	2022-11-28	Snow goose	Waterfowl	Cluster 1	B3.2
USDA	22-039688-009	USA	Louisiana	Mississippi	2022-11-30	Snow goose	Waterfowl	Cluster 1	B3.2
USDA	22-039689-001	USA	Tennessee	Mississippi	2022-11-28	Black Vulture	Non-host wild bird	Cluster 6	B1.1
USDA	22-039689-003	USA	Tennessee	Mississippi	2022-11-28	Black Vulture	Non-host wild bird	Cluster 6	B1.1
USDA	22-039690-001	USA	Kansas	Central	2022-11-21	Snow goose	Waterfowl	Cluster 1	B3.2
USDA	22-039690-002	USA	Kansas	Central	2022-11-23	Snow goose	Waterfowl	Cluster 1	B3.2
USDA	22-039690-003	USA	Kansas	Central	2022-11-23	Snow goose	Waterfowl	Cluster 1	B3.4
USDA	22-039690-004	USA	Kansas	Central	2022-11-23	Snow goose	Waterfowl	Cluster 4	B2.2
USDA	22-039690-005	USA	Kansas	Central	2022-11-23	Snow goose	Waterfowl	Cluster 1	B3.2
USDA	22-039690-006	USA	Kansas	Central	2022-11-28	Snow goose	Waterfowl	Cluster 1	B3.2
USDA	22-039690-007	USA	Kansas	Central	2022-11-27	Snow goose	Waterfowl	Cluster 1	B3.2
USDA	22-039690-008	USA	Kansas	Central	2022-11-23	Snow goose	Waterfowl	Cluster 4	B2.2
USDA	22-039690-012	USA	Kansas	Central	2022-11-29	Red-tailed hawk	Non-host wild bird	Cluster 4	B2.2
USDA	22-039690-014	USA	Kansas	Central	2022-11-22	Snow goose	Waterfowl	Cluster 1	B3.2
USDA	22-039691-001	USA	North Carolina	Atlantic	Unknown	Mallard	Waterfowl	Cluster 1	B3.3
USDA	22-039691-002	USA	North Carolina	Atlantic	Unknown	Mallard	Waterfowl	Cluster 1	B3.3
USDA	22-039694-001	USA	South Carolina	Atlantic	2022-11-17	Black Vulture	Non-host wild bird	Cluster 6	B1.1
USDA	22-039721-003	USA	California	Pacific	2022-11-16	Peregrine falcon	Non-host wild bird	Cluster 1	B3.2
USDA	22-039721-006	USA	California	Pacific	2022-11-16	Bonaparte's Gull	Sea/shore bird	Cluster 3	A3
USDA	22-039756-001	USA	Wyoming	Central	2022-12-05	Great horned owl	Non-host wild bird	Cluster 3	A3
USDA	22-039758-001	USA	Illinois	Mississippi	2022-12-05	Snow goose	Waterfowl	Cluster 4	B2.2
USDA	22-039947-005	USA	Montana	Pacific	2022-12-02	Mallard	Waterfowl	Cluster 1	B3.2
USDA	22-039952-001	USA	Colorado	Central	2022-12-05	Great horned owl	Non-host wild bird	Cluster 1	B3.2
USDA	22-039953-001	USA	Colorado	Central	2022-12-06	Canada goose	Waterfowl	Cluster 6	Minor25
USDA	22-039954-001	USA	Colorado	Central	2022-12-06	Cackling Goose	Waterfowl	Cluster 1	B3.5
USDA	22-039955-001	USA	Colorado	Central	2022-12-06	Great horned owl	Non-host wild bird	Cluster 4	B2.2
USDA	22-039962-001	USA	Colorado	Central	2022-12-06	Merganser	Waterfowl	Cluster 1	B3.2
USDA	22-039970-001	USA	Pennsylvania	Atlantic	2022-11-29	Black Vulture	Non-host wild bird	Cluster 6	B1.1
USDA	22-039971-001	USA	Pennsylvania	Atlantic	2022-11-14	Black Vulture	Non-host wild bird	Cluster 6	B1.1
USDA	22-039972-001	USA	Pennsylvania	Atlantic	2022-11-22	Black Vulture	Non-host wild bird	Cluster 6	B1.1
USDA	22-039973-001	USA	Pennsylvania	Atlantic	2022-10-28	Black Vulture	Non-host wild bird	Cluster 6	B1.1
USDA	22-039975-001	USA	Pennsylvania	Atlantic	2022-10-19	Black Vulture	Non-host wild bird	Cluster 6	B1.1
USDA	22-039984-001	USA	Pennsylvania	Atlantic	2022-10-10	Black Vulture	Non-host wild bird	Cluster 6	B1.1
USDA	22-039984-002	USA	Pennsylvania	Atlantic	2022-10-10	Black Vulture	Non-host wild bird	Cluster 6	B1.1
USDA	22-039984-003	USA	Pennsylvania	Atlantic	2022-10-10	Black Vulture	Non-host wild bird	Cluster 6	B1.1
USDA	22-040176-004	USA	Oregon	Pacific	2022-12-05	American green-winged teal	Waterfowl	Cluster 1	B3.2
USDA	22-040230-002	USA	Florida	Atlantic	Unknown	Sandwich tern	Sea/shore bird	Cluster 4	B2.2
USDA	22-040230-004	USA	Florida	Atlantic	Unknown	lesser scaup	Waterfowl	Cluster 5	B1.3
USDA	22-040230-005	USA	Florida	Atlantic	Unknown	Brown Pelican	Sea/shore bird	Cluster 4	B2.2
USDA	22-040391-003	USA	Alaska	Pacific	2022-12-04	Bald eagle	Non-host wild bird	Cluster 3	A3
USDA	22-040394-001	USA	Washington	Pacific	2022-12-03	Dunlin	Sea/shore bird	Cluster 1	B3.2
USDA	22-040415-001	USA	North Carolina	Atlantic	2022-12-09	Hawk	Non-host wild bird	Cluster 6	B1.1
USDA	22-040427-001	USA	Missouri	Mississippi	2022-12-01	Trumpeter Swan	Waterfowl	Cluster 1	B3.2
USDA	22-040427-002	USA	Missouri	Mississippi	2022-12-01	Snow goose	Waterfowl	Cluster 1	B3.2
USDA	22-040427-003	USA	Missouri	Mississippi	2022-12-01	Snow goose	Waterfowl	Cluster 4	B2.2
USDA	22-040434-002	USA	New Mexico	Central	2022-12-02	Snow goose	Waterfowl	Cluster 4	B2.2
USDA	22-040454-001	USA	Colorado	Central	2022-12-08	Cackling Goose	Waterfowl	Cluster 1	B3.5
USDA	22-040459-002	USA	Colorado	Central	2022-12-09	Red-tailed hawk	Non-host wild bird	Cluster 4	B4.1
USDA	22-040462-002	USA	Tennessee	Mississippi	2022-11-27	Ross's goose	Waterfowl	Cluster 4	B2.2
USDA	22-040465-003	USA	Louisiana	Mississippi	2022-12-05	Red-tailed hawk	Non-host wild bird	Cluster 6	Minor19
USDA	22-040466-001	USA	Kansas	Central	2022-11-29	Great horned owl	Non-host wild bird	Cluster 1	B3.2
USDA	22-040467-009	USA	Arkansas	Mississippi	Unknown	Rosss Goose	Waterfowl	Cluster 4	B2.2
USDA	22-040468-002	USA	North Carolina	Atlantic	2022-12-04	Black Vulture	Non-host wild bird	Cluster 6	B1.1
USDA	22-040524-001	USA	Nebraska	Central	2022-12-10	Hawk	Non-host wild bird	Cluster 4	B2.2
USDA	22-040571-002	USA	Arkansas	Mississippi	2022-12-12	Peregrine falcon	Non-host wild bird	Cluster 6	Minor25
USDA	22-040573-001	USA	Arkansas	Mississippi	Unknown	Gull	Sea/shore bird	Cluster 1	B3.2
USDA	22-040618-001	USA	Nevada	Pacific	2022-12-06	Great horned owl	Non-host wild bird	Cluster 1	B3.2
USDA	22-040681-001	USA	California	Pacific	2022-11-16	Canada goose	Waterfowl	Cluster 4	B4.1
USDA	22-040683-002	USA	Montana	Pacific	Unknown	Canada goose	Waterfowl	Cluster 1	B3.2
USDA	22-040683-004	USA	Montana	Pacific	Unknown	Great horned owl	Non-host wild bird	Cluster 1	B3.2
USDA	22-040683-006	USA	Montana	Pacific	Unknown	Red-tailed hawk	Non-host wild bird	Cluster 3	A3
USDA	22-040685-001	USA	Iowa	Mississippi	2022-11-30	Great horned owl	Non-host wild bird	Cluster 5	B1.3
USDA	22-040701-002	USA	Alabama	Mississippi	2022-12-05	Black Vulture	Non-host wild bird	Cluster 5	B1.3
USDA	22-040718-001	USA	Florida	Atlantic	2022-12-13	Pelican	Sea/shore bird	Cluster 5	B1.3
USDA	22-040719-006	USA	Maine	Atlantic	2022-12-09	Mallard	Waterfowl	Cluster 5	B1.3
USDA	22-040719-013	USA	Maine	Atlantic	2022-12-09	Mallard	Waterfowl	Cluster 5	B1.3
USDA	22-040719-016	USA	Maine	Atlantic	2022-12-09	Mallard	Waterfowl	Cluster 1	B3.2
USDA	22-040720-004	USA	Florida	Atlantic	2022-12-10	American wigeon	Waterfowl	Cluster 1	B3.2
USDA	22-040752-002	USA	Colorado	Central	2022-12-13	Cackling Goose	Waterfowl	Cluster 1	B3.2
USDA	22-040752-003	USA	Colorado	Central	2022-12-13	Cackling Goose	Waterfowl	Cluster 1	B3.2
USDA	22-040752-004	USA	Colorado	Central	2022-12-13	Cackling Goose	Waterfowl	Cluster 4	B2.2
USDA	22-040753-001	USA	Colorado	Central	2022-12-13	Cackling Goose	Waterfowl	Cluster 1	B3.2
USDA	22-040754-001	USA	Colorado	Central	2022-12-14	Red-tailed hawk	Non-host wild bird	Cluster 4	B4.1
USDA	22-040755-001	USA	Colorado	Central	2022-12-13	Great horned owl	Non-host wild bird	Cluster 1	B3.5
USDA	22-040756-001	USA	Colorado	Central	2022-12-12	Red-tailed hawk	Non-host wild bird	Cluster 4	B2.2
USDA	22-040757-001	USA	Colorado	Central	2022-12-14	Cackling Goose	Waterfowl	Cluster 6	Minor19
USDA	22-040760-001	USA	Colorado	Central	Unknown	Snow goose	Waterfowl	Cluster 6	Minor25
USDA	22-040763-001	USA	Colorado	Central	2022-12-10	Cackling Goose	Waterfowl	Cluster 1	B3.2
USDA	22-040763-002	USA	Colorado	Central	2022-12-11	Canada goose	Waterfowl	Cluster 1	B3.2
USDA	22-040763-003	USA	Colorado	Central	2022-12-10	Cackling Goose	Waterfowl	Cluster 1	B3.2
USDA	22-040764-001	USA	Colorado	Central	2022-12-09	Great horned owl	Non-host wild bird	Cluster 1	B3.2
USDA	22-040765-001	USA	Colorado	Central	2022-12-12	Crow	Non-host wild bird	Cluster 1	B3.2
USDA	22-040766-001	USA	Colorado	Central	2022-12-10	Red-tailed hawk	Non-host wild bird	Cluster 6	Minor25
USDA	22-040766-002	USA	Colorado	Central	2022-12-11	Red-tailed hawk	Non-host wild bird	Cluster 1	B3.2
USDA	22-040767-001	USA	Colorado	Central	Unknown	Great horned owl	Non-host wild bird	Cluster 1	B3.2
USDA	22-040776-001	USA	Alabama	Mississippi	2022-12-08	Bald eagle	Non-host wild bird	Cluster 6	B1.1
USDA	22-040782-001	USA	Alabama	Mississippi	2022-12-13	Bald eagle	Non-host wild bird	Cluster 5	B1.3
USDA	22-040785-002	USA	Missouri	Mississippi	2022-12-05	Hawk	Non-host wild bird	Cluster 1	B3.2
USDA	22-040786-001	USA	Missouri	Mississippi	2022-12-08	Snow goose	Waterfowl	Cluster 1	B3.2
USDA	22-040790-001	USA	Iowa	Mississippi	2022-12-07	Canada goose	Waterfowl	Cluster 1	B3.2
USDA	22-040790-003	USA	Iowa	Mississippi	2022-12-07	Canada goose	Waterfowl	Cluster 1	B3.2
USDA	22-040792-001	USA	Iowa	Mississippi	2022-12-08	Canada goose	Waterfowl	Cluster 4	B2.2
USDA	22-040793-003	USA	Iowa	Mississippi	2022-12-06	Canada goose	Waterfowl	Cluster 4	B2.2
USDA	22-040793-004	USA	Iowa	Mississippi	2022-12-06	Canada goose	Waterfowl	Cluster 1	B3.2
USDA	22-040806-001	USA	Alabama	Mississippi	2022-12-12	Gadwall	Waterfowl	Cluster 1	B3.2
USDA	22-040812-001	USA	Oregon	Pacific	2022-12-13	Red-tailed hawk	Non-host wild bird	Cluster 1	B3.2
USDA	22-040817-009	USA	Mississippi	Mississippi	2022-12-09	Black Vulture	Non-host wild bird	Cluster 5	B1.3
USDA	22-040817-015	USA	Mississippi	Mississippi	2022-12-09	Black Vulture	Non-host wild bird	Cluster 5	B1.3
USDA	22-040832-001	USA	Kansas	Central	2022-12-07	Ross's goose	Waterfowl	Cluster 1	B3.2
USDA	22-040946-001	USA	Kentucky	Mississippi	2022-12-16	Goose	Waterfowl	Cluster 4	B2.2
USDA	22-041037-001	USA	Nebraska	Central	2022-12-15	Swan	Waterfowl	Cluster 1	B3.2
USDA	22-041037-002	USA	Nebraska	Central	2022-12-15	Swan	Waterfowl	Cluster 1	B3.2
USDA	22-041037-003	USA	Nebraska	Central	2022-12-15	Canada goose	Waterfowl	Cluster 4	B2.2
USDA	22-041042-001	USA	Oregon	Pacific	2022-12-12	Great horned owl	Non-host wild bird	Cluster 1	B3.2
USDA	22-041048-001	USA	Oregon	Pacific	2022-12-11	Mallard	Waterfowl	Cluster 3	A3
USDA	22-041054-001	USA	Mississippi	Mississippi	2022-12-15	Black Vulture	Non-host wild bird	Cluster 6	B1.1
USDA	22-041054-002	USA	Mississippi	Mississippi	2022-12-15	Black Vulture	Non-host wild bird	Cluster 6	B1.1
USDA	22-041054-003	USA	Mississippi	Mississippi	2022-12-15	Black Vulture	Non-host wild bird	Cluster 6	B1.1
USDA	22-041054-004	USA	Mississippi	Mississippi	2022-12-15	Black Vulture	Non-host wild bird	Cluster 6	B1.1
USDA	22-041054-005	USA	Mississippi	Mississippi	2022-12-15	Black Vulture	Non-host wild bird	Cluster 6	B1.1
USDA	22-041056-001	USA	Mississippi	Mississippi	2022-12-13	Black Vulture	Non-host wild bird	Cluster 6	B1.1
USDA	22-041057-001	USA	Mississippi	Mississippi	2022-12-08	Lesser white-fronted Goose	Waterfowl	Cluster 1	B3.2
USDA	22-041059-001	USA	Alabama	Mississippi	2022-12-13	Canada goose	Waterfowl	Cluster 1	B3.2
USDA	22-041064-001	USA	South Dakota	Central	2022-12-09	Great horned owl	Non-host wild bird	Cluster 4	B2.2
USDA	22-041081-001	USA	Washington	Pacific	2022-12-12	Barn owl	Non-host wild bird	Cluster 1	B3.2
USDA	22-041083-001	USA	New York	Atlantic	2022-12-12	Black Vulture	Non-host wild bird	Cluster 6	B1.1
USDA	22-041085-001	USA	New York	Atlantic	2022-12-12	Turkey Vulture	Non-host wild bird	Cluster 5	B1.3
USDA	22-041088-001	USA	Washington	Pacific	2022-12-14	Cooper's Hawk	Non-host wild bird	Cluster 1	B3.2
USDA	22-041128-001	USA	North Carolina	Atlantic	2022-11-22	Black Vulture	Non-host wild bird	Cluster 6	B1.1
USDA	22-041128-003	USA	North Carolina	Atlantic	2022-12-06	Herring Gull	Sea/shore bird	Cluster 3	A2
USDA	22-041130-001	USA	Kansas	Central	2022-12-02	Cooper's Hawk	Non-host wild bird	Cluster 4	B2.2
USDA	22-041130-002	USA	Kansas	Central	2022-11-29	Ross's goose	Waterfowl	Cluster 1	B3.2
USDA	22-041130-003	USA	Kansas	Central	2022-12-06	Snow goose	Waterfowl	Cluster 1	B3.2
USDA	22-041130-004	USA	Kansas	Central	2022-12-13	great-tailed grackle	Non-host wild bird	Cluster 6	Minor19
USDA	22-041130-005	USA	Kansas	Central	2022-12-13	great-tailed grackle	Non-host wild bird	Cluster 1	B3.2
USDA	22-041130-006	USA	Kansas	Central	2022-12-13	great-tailed grackle	Non-host wild bird	Cluster 1	B3.2
USDA	22-041131-001	USA	Virginia	Atlantic	2022-12-08	Bald eagle	Non-host wild bird	Cluster 5	B1.3
USDA	22-041132-005	USA	Texas	Central	2022-09-20	Blue-winged teal	Waterfowl	Cluster 1	B3.2
USDA	22-041132-007	USA	Texas	Central	2022-09-20	Blue-winged teal	Waterfowl	Cluster 1	B3.2
USDA	22-041132-014	USA	Texas	Central	2022-09-21	Blue-winged teal	Waterfowl	Cluster 4	B2.2
USDA	22-041145-001	USA	Maine	Atlantic	2022-12-14	Mallard	Waterfowl	Cluster 1	B3.2
USDA	22-041145-003	USA	Maine	Atlantic	2022-12-14	Mallard	Waterfowl	Cluster 1	B3.2
USDA	22-041146-005	USA	Maine	Atlantic	2022-12-12	Mallard	Waterfowl	Cluster 5	B1.3
USDA	22-041147-001	USA	Maine	Atlantic	2022-12-14	Mallard	Waterfowl	Cluster 5	B1.3
USDA	22-041261-001	USA	Wyoming	Central	2022-12-14	Canada goose	Waterfowl	Cluster 1	B3.2
USDA	22-041262-001	USA	Wyoming	Central	Unknown	Canada goose	Waterfowl	Cluster 1	B3.2
USDA	22-041306-001	USA	Minnesota	Mississippi	2022-12-19	Canada goose	Waterfowl	Cluster 1	B3.2
USDA	22-041306-002	USA	Minnesota	Mississippi	2022-12-19	Canada goose	Waterfowl	Cluster 1	B3.6
USDA	22-041366-001	USA	Colorado	Central	2022-12-13	Great horned owl	Non-host wild bird	Cluster 6	Minor25
USDA	22-041368-001	USA	Colorado	Central	2022-12-16	Great horned owl	Non-host wild bird	Cluster 4	B4.1
USDA	22-041373-003	USA	Indiana	Mississippi	2022-12-12	American white Pelican	Sea/shore bird	Cluster 4	B2.2
USDA	22-041396-002	USA	California	Pacific	2022-12-01	Raven	Non-host wild bird	Cluster 3	A3
USDA	22-041396-003	USA	California	Pacific	2022-12-01	Bald eagle	Non-host wild bird	Cluster 3	A3
USDA	22-041398-001	USA	California	Pacific	2022-12-01	Snow goose	Waterfowl	Cluster 1	B3.2
USDA	22-041399-001	USA	California	Pacific	2022-12-01	Canada goose	Waterfowl	Cluster 1	B3.2
USDA	22-041399-002	USA	California	Pacific	2022-12-01	Canada goose	Waterfowl	Cluster 1	B3.2
USDA	22-041400-001	USA	California	Pacific	2022-12-01	Great horned owl	Non-host wild bird	Cluster 3	A3
USDA	22-041400-002	USA	California	Pacific	2022-12-01	Snow goose	Waterfowl	Cluster 1	B3.2
USDA	22-041401-001	USA	California	Pacific	2022-12-01	Snowy plover	Sea/shore bird	Cluster 3	A3
USDA	22-041402-001	USA	California	Pacific	2022-12-01	Red-tailed hawk	Non-host wild bird	Cluster 1	B3.2
USDA	22-041403-001	USA	California	Pacific	2022-12-01	Snow goose	Waterfowl	Cluster 1	B3.2
USDA	22-041403-002	USA	California	Pacific	2022-12-01	Snow goose	Waterfowl	Cluster 1	B3.2
USDA	22-041403-003	USA	California	Pacific	2022-12-01	Snow goose	Waterfowl	Cluster 1	B3.2
USDA	22-041406-001	USA	California	Pacific	2022-11-28	Snow goose	Waterfowl	Cluster 1	B3.2
USDA	22-041407-001	USA	California	Pacific	2022-12-01	Turkey Vulture	Non-host wild bird	Cluster 1	B3.2
USDA	22-041408-001	USA	California	Pacific	2022-12-01	Snow goose	Waterfowl	Cluster 1	B3.2
USDA	22-041409-001	USA	California	Pacific	2022-12-01	Snow goose	Waterfowl	Cluster 1	B3.2
USDA	22-041409-002	USA	California	Pacific	2022-12-01	Turkey Vulture	Non-host wild bird	Cluster 6	Minor25
USDA	22-041409-003	USA	California	Pacific	2022-12-01	Turkey Vulture	Non-host wild bird	Cluster 1	B3.2
USDA	22-041410-001	USA	California	Pacific	2022-11-29	Gull	Sea/shore bird	Cluster 4	B2.2
USDA	22-041410-002	USA	California	Pacific	2022-11-29	Gull	Sea/shore bird	Cluster 4	B2.2
USDA	22-041760-007	USA	Louisiana	Mississippi	2022-12-17	American green-winged teal	Waterfowl	Cluster 1	B3.2
USDA	22-041761-001	USA	Alabama	Mississippi	2022-12-10	Gadwall	Waterfowl	Cluster 4	B2.2
USDA	22-041761-007	USA	Alabama	Mississippi	2022-12-10	American wigeon	Waterfowl	Cluster 1	B3.2
USDA	22-041761-016	USA	Alabama	Mississippi	2022-12-10	Gadwall	Waterfowl	Cluster 4	B2.2
USDA	22-041762-001	USA	Alabama	Mississippi	2022-12-10	Gadwall	Waterfowl	Cluster 1	B3.2
USDA	22-041762-002	USA	Alabama	Mississippi	2022-12-10	Gadwall	Waterfowl	Cluster 4	B2.2
USDA	22-041762-003	USA	Alabama	Mississippi	2022-12-10	Gadwall	Waterfowl	Cluster 4	B2.2
USDA	22-041762-004	USA	Alabama	Mississippi	2022-12-10	Gadwall	Waterfowl	Cluster 1	B3.2
USDA	22-041762-005	USA	Alabama	Mississippi	2022-12-10	Gadwall	Waterfowl	Cluster 1	B3.2
USDA	22-041762-006	USA	Alabama	Mississippi	2022-12-10	Gadwall	Waterfowl	Cluster 1	B3.2
USDA	22-041764-001	USA	Alabama	Mississippi	2022-12-20	Snow goose	Waterfowl	Cluster 1	B3.2
USDA	22-041771-002	USA	Wyoming	Central	2022-12-20	Great horned owl	Non-host wild bird	Cluster 1	B3.2
USDA	22-041774-001	USA	Pennsylvania	Atlantic	2022-12-19	White-winged scoter	Waterfowl	Cluster 5	B1.3
USDA	22-041777-001	USA	Wisconsin	Mississippi	2022-12-19	Sandhill crane	Non-host wild bird	Cluster 1	B3.4
USDA	22-041828-001	USA	Colorado	Central	2022-12-20	Red-tailed hawk	Non-host wild bird	Cluster 1	B3.2
USDA	22-041829-001	USA	Colorado	Central	2022-12-19	Canada goose	Waterfowl	Cluster 1	B3.2
USDA	22-041830-001	USA	Colorado	Central	2022-12-20	Red-tailed hawk	Non-host wild bird	Cluster 1	B3.2
USDA	22-041831-001	USA	Colorado	Central	2022-12-22	Red-tailed hawk	Non-host wild bird	Cluster 4	B2.2
USDA	22-041851-002	USA	Florida	Atlantic	Unknown	Red-shouldered hawk	Non-host wild bird	Cluster 5	B1.3
USDA	22-041852-001	USA	Florida	Atlantic	2022-12-19	Hooded Merganser	Waterfowl	Cluster 5	B1.3
USDA	22-041852-002	USA	Florida	Atlantic	2022-12-19	Hooded Merganser	Waterfowl	Cluster 5	B1.3
USDA	22-041853-001	USA	Florida	Atlantic	2022-12-18	Bald eagle	Non-host wild bird	Cluster 5	B1.3
USDA	22-041853-002	USA	Florida	Atlantic	2022-12-18	Bald eagle	Non-host wild bird	Cluster 5	B1.3
USDA	22-041882-001	USA	California	Pacific	2022-12-07	Red-tailed hawk	Non-host wild bird	Cluster 4	B4.1
USDA	22-041884-001	USA	Minnesota	Mississippi	2022-12-07	Great horned owl	Non-host wild bird	Cluster 1	B3.2
USDA	22-041958-001	USA	Oregon	Pacific	2022-12-11	Western Gull	Sea/shore bird	Cluster 3	A3
USDA	22-041982-002	USA	Virginia	Atlantic	2022-12-17	Blue-winged teal	Waterfowl	Cluster 5	B1.3
USDA	22-041983-001	USA	Washington	Pacific	2022-12-16	Snow goose	Waterfowl	Cluster 1	B3.2
USDA	22-041996-001	USA	Alabama	Mississippi	2022-12-21	Black Vulture	Non-host wild bird	Cluster 6	B1.1
[truncated: 2,754 more rows]
