# Supplementary material for: Genotypic Clustering of H5N1 Avian Influenza Viruses Detected in North America
Source: Preprints.org preprint supplement (doi:10.20944/preprints202410.2401.v1), 2024-10-31
Supplement: Supplementary file 3 [file Tawidianetal2024_TableS3.xlsx]

## Sheet: Sheet1
Supplemetary Table S3. Genotypic assignment of representative H5N1 sequences for reference dataset.
ID	Genotype
22_006976_009	A1
22_008377_004	A1
22_011101_006	A1
22_011101_008	A1
22_011101_009	A1
22_012056_007	A1
22_012338_011	A1
22_013262_001	A1
22_013269_001	A1
22_013435_001	A1
22_013493_003	A1
22_013517_010	A1
22_013663_002	A1
22_013814_001	A1
22_013814_002	A1
22_013871_001	A1
22_013873_001	A1
22_014489_001	A1
22_014489_002	A1
22_014517_001	A1
22_014520_001	A1
22_014659_001	A1
22_014899_001	A1
22_015054_006	A1
22_015545_001	A1
22_015675_001	A1
22_015805_001	A1
22_016611_002	A1
22_016611_003	A1
22_016611_010	A1
22_016611_012	A1
22_016661_001	A1
22_017570_001	A1
22_017572_001	A1
22_017713_001	A1
22_017774_001	A1
22_017774_003	A1
22_017947_001	A1
22_017947_002	A1
22_019204_001	A1
22_021121_001	A1
22_021652_001	A1
22_021654_001	A1
22_024871_001	A1
22_024871_002	A1
22_024871_003	A1
22_024871_004	A1
22_024871_005	A1
22_024871_006	A1
22_024871_007	A1
22_024871_009	A1
22_024871_010	A1
22_024871_011	A1
22_024871_012	A1
22_024871_013	A1
22_024871_014	A1
22_024871_015	A1
22_024871_016	A1
22_024871_017	A1
22_024871_019	A1
22_026129_002	A1
22_027736_001	A1
22_029063_031	A1
22_030262_003	A1
22_030264_001	A1
22_030593_001	A1
22_030620_001	A1
22_033697_001	A1
22_036181_002	A1
22_036181_003	A1
22_008951_001	A2
22_008951_003	A2
22_008951_006	A2
22_008951_007	A2
22_008951_008	A2
22_008951_010	A2
22_010671_002	A2
22_010671_003	A2
22_010671_006	A2
22_013380_001	A2
22_015021_001	A2
22_015666_001	A2
22_016611_006	A2
22_016611_009	A2
22_016611_015	A2
22_019521_001	A2
22_019521_002	A2
22_019521_003	A2
22_019521_004	A2
22_019521_005	A2
22_020357_001	A2
22_020416_001	A2
22_020416_003	A2
22_020416_004	A2
22_020416_005	A2
22_020416_006	A2
22_020416_007	A2
22_020416_008	A2
22_020416_009	A2
22_020416_010	A2
22_020416_011	A2
22_020416_012	A2
22_020416_013	A2
22_020416_014	A2
22_020416_015	A2
22_020416_016	A2
22_020416_017	A2
22_020416_018	A2
22_020416_019	A2
22_020416_020	A2
22_020416_022	A2
22_020416_023	A2
22_020652_001	A2
22_020656_001	A2
22_020657_001	A2
22_020657_002	A2
22_020657_003	A2
22_020831_001	A2
22_020831_002	A2
22_020831_004	A2
22_021035_001	A2
22_022234_001	A2
22_022236_001	A2
22_024700_001	A2
22_025070_001	A2
22_028621_007	A2
22_028621_034	A2
22_036180_002	A2
22_036180_003	A2
22_036180_004	A2
22_036180_005	A2
22_036180_006	A2
22_036180_007	A2
22_036180_008	A2
22_036180_009	A2
22_041128_003	A2
23_000361_002	A2
23_001397_015	A2
23_004612_005	A2
23_004612_023	A2
22_015680_001	A3
22_015682_001	A3
22_017950_001	A3
22_023553_003	A3
22_025499_001	A3
22_025788_001	A3
22_031916_001	A3
22_033430_001	A3
22_034097_007	A3
22_035760_001	A3
22_036618_001	A3
22_037636_003	A3
22_037656_001	A3
22_037656_002	A3
22_037656_003	A3
22_038528_001	A3
22_038658_001	A3
22_039438_020	A3
22_039438_021	A3
22_039721_006	A3
22_039756_001	A3
22_040391_003	A3
22_040683_006	A3
22_041048_001	A3
22_041396_002	A3
22_041396_003	A3
22_041400_001	A3
22_041401_001	A3
22_041958_001	A3
22_042131_001	A3
22_042131_002	A3
22_042131_003	A3
23_000227_001	A3
23_000269_001	A3
23_000764_001	A3
23_000775_001	A3
23_000948_003	A3
23_000949_001	A3
23_000979_001	A3
23_001052_001	A3
23_001053_005	A3
23_001056_002	A3
23_001057_001	A3
23_001057_002	A3
23_002118_001	A3
23_002599_002	A3
23_002599_003	A3
23_002599_004	A3
23_002693_009	A3
23_002693_022	A3
23_002693_027	A3
23_002693_028	A3
23_002693_029	A3
23_002977_001	A3
23_003666_004	A3
23_004359_001	A3
23_004360_001	A3
23_004365_001	A3
23_004366_002	A3
23_004367_001	A3
23_004368_001	A3
23_004370_003	A3
23_004370_004	A3
23_010558_001	A3
23_010675_001	A3
23_010675_002	A3
23_010946_001	A3
23_011580_001	A3
23_011580_002	A3
23_011582_001	A3
23_003641_002	A4
23_003641_003	A4
23_003641_004	A4
23_003641_005	A4
23_003641_006	A4
23_003641_007	A4
23_001397_012	A5
23_004612_003	A5
23_004612_006	A5
23_004612_009	A5
23_004612_010	A5
23_004612_022	A5
23_004612_027	A5
23_004612_028	A5
22_008834_002	B1.1
22_008834_003	B1.1
22_008834_004	B1.1
22_009058_002	B1.1
22_009940_002	B1.1
22_009941_002	B1.1
22_011808_003	B1.1
22_012388_001	B1.1
22_012628_002	B1.1
22_012784_001	B1.1
22_013273_001	B1.1
22_013275_001	B1.1
22_013277_001	B1.1
22_013277_002	B1.1
22_013395_011	B1.1
22_013424_001	B1.1
22_013424_002	B1.1
22_013424_003	B1.1
22_013462_001	B1.1
22_013462_002	B1.1
22_013487_001	B1.1
22_013488_001	B1.1
22_013489_001	B1.1
22_013490_001	B1.1
22_013490_002	B1.1
22_013492_001	B1.1
22_013492_002	B1.1
22_013493_001	B1.1
22_013493_002	B1.1
22_013517_001	B1.1
22_013517_007	B1.1
22_013642_002	B1.1
22_013957_002	B1.1
22_013984_002	B1.1
22_014026_001	B1.1
22_014034_001	B1.1
22_014034_002	B1.1
22_014035_001	B1.1
22_014036_001	B1.1
22_014308_002	B1.1
22_014308_003	B1.1
22_014308_004	B1.1
22_014308_005	B1.1
22_014308_006	B1.1
22_014360_001	B1.1
22_014378_001	B1.1
22_014378_002	B1.1
22_014379_001	B1.1
22_014393_001	B1.1
22_014967_001	B1.1
22_015012_002	B1.1
22_015016_002	B1.1
22_015023_001	B1.1
22_015054_001	B1.1
22_015095_002	B1.1
22_015260_001	B1.1
22_015304_001	B1.1
22_015581_001	B1.1
22_015660_001	B1.1
22_015660_002	B1.1
22_015660_003	B1.1
22_015799_001	B1.1
22_015801_001	B1.1
22_015802_001	B1.1
22_015812_001	B1.1
22_015900_001	B1.1
22_016115_001	B1.1
22_016116_001	B1.1
22_016119_001	B1.1
22_016119_002	B1.1
22_010922_002	B1.2
22_012383_001	B1.2
22_012396_001	B1.2
22_013321_001	B1.2
22_013321_002	B1.2
22_013321_003	B1.2
22_013438_001	B1.2
22_013517_002	B1.2
22_013517_003	B1.2
22_013517_011	B1.2
22_013642_001	B1.2
22_013751_003	B1.2
22_013870_001	B1.2
22_013872_001	B1.2
22_013875_001	B1.2
22_014028_001	B1.2
22_014359_001	B1.2
22_014359_002	B1.2
22_014359_003	B1.2
22_014361_001	B1.2
22_014371_001	B1.2
22_014373_001	B1.2
22_014545_001	B1.2
22_014784_001	B1.2
22_015054_002	B1.2
22_015054_005	B1.2
22_015054_009	B1.2
22_015054_010	B1.2
22_015239_001	B1.2
22_015665_001	B1.2
22_015668_001	B1.2
22_015789_001	B1.2
22_015937_001	B1.2
22_016486_001	B1.2
22_016539_001	B1.2
22_016540_002	B1.2
22_016541_001	B1.2
22_016894_001	B1.2
22_017243_001	B1.2
22_017243_007	B1.2
22_017243_010	B1.2
22_017243_011	B1.2
22_017243_012	B1.2
22_017243_013	B1.2
22_017243_015	B1.2
22_017243_022	B1.2
22_017507_002	B1.2
22_017550_001	B1.2
22_017571_001	B1.2
22_017717_001	B1.2
22_017717_002	B1.2
22_017717_005	B1.2
22_018184_001	B1.2
22_018806_002	B1.2
22_018806_003	B1.2
22_018806_004	B1.2
22_018806_005	B1.2
22_018930_001	B1.2
22_019920_001	B1.2
22_019921_001	B1.2
22_019922_001	B1.2
22_021647_001	B1.2
22_021648_001	B1.2
22_021649_001	B1.2
22_026960_001	B1.2
22_027406_001	B1.2
22_027406_002	B1.2
22_027890_001	B1.2
22_027997_001	B1.2
22_028148_007	B1.2
22_024975_001	B1.3
22_024975_002	B1.3
22_024975_003	B1.3
22_026130_001	B1.3
22_026960_002	B1.3
22_027083_001	B1.3
22_027083_002	B1.3
22_027083_003	B1.3
22_027083_004	B1.3
22_027083_005	B1.3
22_027222_001	B1.3
22_027249_001	B1.3
22_027250_001	B1.3
22_027484_001	B1.3
22_027484_002	B1.3
22_027571_001	B1.3
22_027922_001	B1.3
22_027922_004	B1.3
22_027922_006	B1.3
22_027923_002	B1.3
22_028121_001	B1.3
22_028315_001	B1.3
22_028315_002	B1.3
22_028571_001	B1.3
22_028574_001	B1.3
22_028575_001	B1.3
22_028671_001	B1.3
22_028671_002	B1.3
22_028681_001	B1.3
22_028681_002	B1.3
22_028905_002	B1.3
22_029080_001	B1.3
22_029080_003	B1.3
22_029081_002	B1.3
22_029130_001	B1.3
22_029187_001	B1.3
22_029191_001	B1.3
22_029199_001	B1.3
22_029199_002	B1.3
22_029310_001	B1.3
22_029310_002	B1.3
22_029336_017	B1.3
22_029610_001	B1.3
22_029889_003	B1.3
22_029889_004	B1.3
22_029889_007	B1.3
22_029889_015	B1.3
22_029901_002	B1.3
22_029929_002	B1.3
22_029929_003	B1.3
22_030040_001	B1.3
22_030041_001	B1.3
22_030200_001	B1.3
22_030201_001	B1.3
22_030202_001	B1.3
22_030203_001	B1.3
22_030257_001	B1.3
22_030258_001	B1.3
22_030262_001	B1.3
22_030404_001	B1.3
22_030423_040	B1.3
22_030855_002	B1.3
22_031242_001	B1.3
22_031242_004	B1.3
22_031242_005	B1.3
22_031379_006	B1.3
22_031456_001	B1.3
22_031744_001	B1.3
22_031760_001	B1.3
22_010713_003	B2.1
22_011426_002	B2.1
22_011426_004	B2.1
22_011426_008	B2.1
22_012382_001	B2.1
22_012387_001	B2.1
22_012391_001	B2.1
22_012392_001	B2.1
22_012395_001	B2.1
22_012668_012	B2.1
22_012777_001	B2.1
22_012931_008	B2.1
22_013128_005	B2.1
22_013257_001	B2.1
22_013257_002	B2.1
22_013261_002	B2.1
22_013264_001	B2.1
22_013265_001	B2.1
22_013267_001	B2.1
22_013272_001	B2.1
22_013276_001	B2.1
22_013278_001	B2.1
22_013279_002	B2.1
22_013394_002	B2.1
22_013395_003	B2.1
22_013395_004	B2.1
22_013395_010	B2.1
22_013395_013	B2.1
22_013396_001	B2.1
22_013397_001	B2.1
22_013422_001	B2.1
22_013422_004	B2.1
22_013422_005	B2.1
22_013422_006	B2.1
22_013422_007	B2.1
22_013425_001	B2.1
22_013425_002	B2.1
22_013425_003	B2.1
22_013426_001	B2.1
22_013430_001	B2.1
22_013431_001	B2.1
22_013432_001	B2.1
22_013433_001	B2.1
22_013434_001	B2.1
22_013437_001	B2.1
22_013532_001	B2.1
22_013533_001	B2.1
22_013534_001	B2.1
22_013558_001	B2.1
22_013643_001	B2.1
22_013651_001	B2.1
22_013662_001	B2.1
22_013662_003	B2.1
22_013663_005	B2.1
22_013663_007	B2.1
22_013666_001	B2.1
22_013669_001	B2.1
22_013672_001	B2.1
22_013751_001	B2.1
22_013751_004	B2.1
22_013751_005	B2.1
22_013770_001	B2.1
22_013929_001	B2.1
22_013957_003	B2.1
22_013959_001	B2.1
22_014003_002	B2.1
22_014006_001	B2.1
22_014006_002	B2.1
22_014031_001	B2.1
22_014031_002	B2.1
22_010305_002	B2.2
22_012393_001	B2.2
22_013279_001	B2.2
22_014260_001	B2.2
22_018538_001	B2.2
22_023993_001	B2.2
22_026659_002	B2.2
22_026660_003	B2.2
22_026962_031	B2.2
22_026962_034	B2.2
22_026962_042	B2.2
22_026962_083	B2.2
22_027793_001	B2.2
22_027816_010	B2.2
22_028327_003	B2.2
22_028327_004	B2.2
22_028327_006	B2.2
22_028327_014	B2.2
22_028327_015	B2.2
22_028327_017	B2.2
22_028328_001	B2.2
22_028328_003	B2.2
22_028546_001	B2.2
22_028596_002	B2.2
22_028597_001	B2.2
22_028755_003	B2.2
22_028829_005	B2.2
22_029332_029	B2.2
22_029332_033	B2.2
22_029357_001	B2.2
22_029358_001	B2.2
22_029359_001	B2.2
22_029397_001	B2.2
22_029821_004	B2.2
22_029822_001	B2.2
22_029822_002	B2.2
22_029822_003	B2.2
22_030048_001	B2.2
22_030175_001	B2.2
22_030621_001	B2.2
22_030622_001	B2.2
22_030640_001	B2.2
22_030640_002	B2.2
22_030935_001	B2.2
22_031068_001	B2.2
22_031164_001	B2.2
22_031341_001	B2.2
22_031350_010	B2.2
22_031397_001	B2.2
22_031703_001	B2.2
22_031740_001	B2.2
22_032213_001	B2.2
22_032425_008	B2.2
22_032575_002	B2.2
22_032575_003	B2.2
22_032575_004	B2.2
22_032664_001	B2.2
22_032792_001	B2.2
22_032915_001	B2.2
22_032994_001	B2.2
22_033111_001	B2.2
22_033592_012	B2.2
22_033689_005	B2.2
22_034580_001	B2.2
22_035434_001	B2.2
22_035435_001	B2.2
22_035956_004	B2.2
22_035956_005	B2.2
22_035956_006	B2.2
22_036228_001	B2.2
22_008719_004	B3.1
22_011871_007	B3.1
22_012381_001	B3.1
22_012777_002	B3.1
22_013394_001	B3.1
22_013420_001	B3.1
22_013421_002	B3.1
22_013422_002	B3.1
22_013428_001	B3.1
22_013544_001	B3.1
22_014522_001	B3.1
22_014531_001	B3.1
22_014532_002	B3.1
22_015563_001	B3.1
22_015576_001	B3.1
22_015577_001	B3.1
22_015577_002	B3.1
22_015577_004	B3.1
22_015585_001	B3.1
22_015813_002	B3.1
22_015815_001	B3.1
22_016228_001	B3.1
22_016457_007	B3.1
22_017061_001	B3.1
22_017061_002	B3.1
22_017363_001	B3.1
22_017953_005	B3.1
22_018401_001	B3.1
22_018474_003	B3.1
22_018767_003	B3.1
22_019942_001	B3.1
22_019942_002	B3.1
22_033108_001	B3.1
22_035515_008	B3.1
22_035515_010	B3.1
EPI_ISL_11971467	B3.1
EPI_ISL_12691035	B3.1
EPI_ISL_13052431	B3.1
EPI_ISL_14937000	B3.1
EPI_ISL_15078251	B3.1
EPI_ISL_16171472	B3.1
EPI_ISL_16240456	B3.1
EPI_ISL_16240642	B3.1
EPI_ISL_16240643	B3.1
EPI_ISL_16243210	B3.1
EPI_ISL_16243316	B3.1
EPI_ISL_16243894	B3.1
EPI_ISL_16244007	B3.1
EPI_ISL_16244008	B3.1
EPI_ISL_16297336	B3.1
EPI_ISL_16555204	B3.1
EPI_ISL_17051050	B3.1
EPI_ISL_17051334	B3.1
EPI_ISL_17051337	B3.1
EPI_ISL_17051370	B3.1
EPI_ISL_17073217	B3.1
EPI_ISL_18132166	B3.1
EPI_ISL_18132171	B3.1
EPI_ISL_18132176	B3.1
EPI_ISL_18132187	B3.1
EPI_ISL_18132190	B3.1
EPI_ISL_18132212	B3.1
EPI_ISL_18132221	B3.1
EPI_ISL_18132223	B3.1
EPI_ISL_18132224	B3.1
EPI_ISL_18132233	B3.1
EPI_ISL_18132252	B3.1
EPI_ISL_18132281	B3.1
EPI_ISL_18132293	B3.1
EPI_ISL_18132300	B3.1
22_011040_003	B3.2
22_013261_003	B3.2
22_013261_004	B3.2
22_013261_005	B3.2
22_013262_002	B3.2
22_013265_002	B3.2
22_013395_002	B3.2
22_013395_005	B3.2
22_013395_007	B3.2
22_013395_008	B3.2
22_013395_009	B3.2
22_013397_002	B3.2
22_013421_001	B3.2
22_013422_003	B3.2
22_013436_001	B3.2
22_013518_001	B3.2
22_013663_004	B3.2
22_013663_006	B3.2
22_013667_001	B3.2
22_013673_001	B3.2
22_013751_002	B3.2
22_014030_001	B3.2
22_014037_004	B3.2
22_014183_003	B3.2
22_014183_004	B3.2
22_014333_001	B3.2
22_014336_004	B3.2
22_014336_009	B3.2
22_014336_015	B3.2
22_014352_001	B3.2
22_014354_001	B3.2
22_014362_001	B3.2
22_014365_001	B3.2
22_014366_001	B3.2
22_014367_001	B3.2
22_014369_001	B3.2
22_014404_001	B3.2
22_014405_001	B3.2
22_014416_001	B3.2
22_014435_001	B3.2
22_014515_001	B3.2
22_014521_001	B3.2
22_014521_002	B3.2
22_014525_001	B3.2
22_014529_001	B3.2
22_014532_001	B3.2
22_014533_002	B3.2
22_014658_004	B3.2
22_014658_007	B3.2
22_014659_002	B3.2
22_014968_005	B3.2
22_014968_006	B3.2
22_014968_007	B3.2
22_014971_001	B3.2
22_015095_001	B3.2
22_015197_002	B3.2
22_015312_001	B3.2
22_015314_001	B3.2
22_015458_001	B3.2
22_015526_002	B3.2
22_015526_003	B3.2
22_015526_004	B3.2
22_015526_005	B3.2
22_015526_006	B3.2
22_015674_001	B3.2
22_016225_001	B3.2
22_016227_001	B3.2
22_016277_001	B3.2
22_016279_001	B3.2
22_016284_001	B3.2
22_033009_010	B3.3
22_033479_003	B3.3
22_033479_013	B3.3
22_035404_002	B3.3
22_039691_001	B3.3
22_039691_002	B3.3
EPI_ISL_17964924	B3.3
22_037628_005	B3.4
22_038802_004	B3.4
22_038821_007	B3.4
22_038821_028	B3.4
22_039690_003	B3.4
22_041777_001	B3.4
22_042176_001	B3.4
22_042176_002	B3.4
23_000394_001	B3.4
23_000409_014	B3.4
23_001510_001	B3.4
23_001516_001	B3.4
23_001521_001	B3.4
23_002711_001	B3.4
23_003815_001	B3.4
23_008404_022	B3.4
EPI_ISL_17964888	B3.4
22_039077_001	B3.5
22_039954_001	B3.5
22_040454_001	B3.5
22_040755_001	B3.5
22_042089_001	B3.5
22_042091_001	B3.5
23_000336_003	B3.5
23_000757_001	B3.5
23_001192_001	B3.5
23_001193_001	B3.5
23_001474_001	B3.5
23_001573_001	B3.5
23_002119_001	B3.5
23_008586_001	B3.5
EPI_ISL_17964847	B3.5
EPI_ISL_17964850	B3.5
EPI_ISL_17964854	B3.5
EPI_ISL_17964862	B3.5
EPI_ISL_17964869	B3.5
EPI_ISL_17964871	B3.5
EPI_ISL_17964872	B3.5
EPI_ISL_17964873	B3.5
EPI_ISL_17964875	B3.5
EPI_ISL_17964880	B3.5
EPI_ISL_17964881	B3.5
EPI_ISL_17964884	B3.5
EPI_ISL_17964885	B3.5
EPI_ISL_17964886	B3.5
EPI_ISL_17964887	B3.5
EPI_ISL_17964898	B3.5
EPI_ISL_17964899	B3.5
EPI_ISL_17964900	B3.5
EPI_ISL_17964914	B3.5
EPI_ISL_17964915	B3.5
EPI_ISL_17964938	B3.5
EPI_ISL_17964954	B3.5
EPI_ISL_17964956	B3.5
EPI_ISL_17964958	B3.5
EPI_ISL_17964962	B3.5
EPI_ISL_17964963	B3.5
EPI_ISL_17964964	B3.5
EPI_ISL_17964965	B3.5
EPI_ISL_17964967	B3.5
EPI_ISL_17964971	B3.5
EPI_ISL_17964972	B3.5
EPI_ISL_17964975	B3.5
22_038652_002	B3.6
22_041306_002	B3.6
23_012938_001	B3.6
23_028760_020	B3.6
23_029229_001	B3.6
23_029294_001	B3.6
23_029312_002	B3.6
23_029480_008	B3.6
23_029854_011	B3.6
23_029854_015	B3.6
23_029854_022	B3.6
23_029854_024	B3.6
23_030180_001	B3.6
23_030444_001	B3.6
23_030444_002	B3.6
23_030445_008	B3.6
23_030445_012	B3.6
23_030445_013	B3.6
23_030445_015	B3.6
23_030714_006	B3.6
23_030714_044	B3.6
23_030893_003	B3.6
23_030893_007	B3.6
23_030993_003	B3.6
23_030994_006	B3.6
23_030994_012	B3.6
23_030994_014	B3.6
23_031335_001	B3.6
23_031492_001	B3.6
23_031647_001	B3.6
EPI_ISL_17964905	B3.6
23_028151_005	B3.7
23_028151_007	B3.7
23_028151_008	B3.7
23_028151_018	B3.7
23_028151_026	B3.7
23_029400_008	B3.7
23_029400_012	B3.7
23_029400_013	B3.7
23_029400_016	B3.7
23_029400_017	B3.7
23_029400_018	B3.7
23_030412_001	B3.7
23_031491_001	B3.7
22_012380_002	B4.1
22_012708_001	B4.1
22_013369_001	B4.1
22_013369_006	B4.1
22_013369_007	B4.1
22_013369_008	B4.1
22_013369_009	B4.1
22_013610_001	B4.1
22_013941_002	B4.1
22_014004_002	B4.1
22_014024_001	B4.1
22_014025_001	B4.1
22_014402_001	B4.1
22_014430_001	B4.1
22_014430_002	B4.1
22_014430_003	B4.1
22_014430_004	B4.1
22_014431_005	B4.1
22_014432_001	B4.1
22_014433_001	B4.1
22_014479_001	B4.1
22_014696_001	B4.1
22_014780_001	B4.1
22_014874_004	B4.1
22_014968_002	B4.1
22_014968_004	B4.1
22_014968_009	B4.1
22_014968_010	B4.1
22_014968_011	B4.1
22_014968_012	B4.1
22_015303_001	B4.1
22_015413_001	B4.1
22_015413_002	B4.1
22_015417_001	B4.1
22_015508_001	B4.1
22_015514_001	B4.1
22_015514_002	B4.1
22_015516_001	B4.1
22_015521_007	B4.1
22_015525_002	B4.1
22_015563_002	B4.1
22_015563_004	B4.1
22_015627_002	B4.1
22_015683_001	B4.1
22_015733_001	B4.1
22_015783_001	B4.1
22_015804_001	B4.1
22_015806_002	B4.1
22_015807_001	B4.1
22_015811_001	B4.1
22_015816_001	B4.1
22_015921_001	B4.1
22_015926_001	B4.1
22_016060_001	B4.1
22_016061_001	B4.1
22_016238_001	B4.1
22_016273_001	B4.1
22_016455_001	B4.1
22_016456_001	B4.1
22_016457_009	B4.1
22_016457_010	B4.1
22_016837_001	B4.1
22_016934_001	B4.1
22_016934_002	B4.1
22_016934_003	B4.1
22_016938_001	B4.1
22_016939_001	B4.1
22_016940_001	B4.1
22_016941_001	B4.1
22_016942_001	B4.1
EPI_ISL_11971465	B5.1
EPI_ISL_11971501	B5.1
EPI_ISL_18132172	B5.1
EPI_ISL_18132189	B5.1
EPI_ISL_18132236	B5.1
EPI_ISL_18132278	B5.1
EPI_ISL_18132312	B5.1
EPI_ISL_18132340	B5.1
EPI_ISL_18132360	B5.1
EPI_ISL_18132363	B5.1
EPI_ISL_18132406	B5.1
EPI_ISL_18132503	B5.1
EPI_ISL_18132539	B5.1
EPI_ISL_18132738	B5.1
EPI_ISL_18132865	B5.1
EPI_ISL_18133175	B5.1
EPI_ISL_18133187	B5.1
EPI_ISL_18133191	B5.1
EPI_ISL_18133452	B5.1
EPI_ISL_14233921	EA
EPI_ISL_15925883	EA
EPI_ISL_16056570	EA
EPI_ISL_16056571	EA
EPI_ISL_16056572	EA
EPI_ISL_16206845	EA
EPI_ISL_16524187	EA
EPI_ISL_16524203	EA
EPI_ISL_16524213	EA
EPI_ISL_16811039	EA
EPI_ISL_16243264	Minor01
EPI_ISL_16243273	Minor01
EPI_ISL_18132295	Minor01
EPI_ISL_18132403	Minor01
EPI_ISL_18132794	Minor01
EPI_ISL_18132930	Minor01
EPI_ISL_18132982	Minor01
W22_153B	Minor01
EPI_ISL_18132707	Minor04
EPI_ISL_18132711	Minor04
EPI_ISL_18133081	Minor07
22_013321_004	Minor08
22_013874_001	Minor08
EPI_ISL_15215277	Minor08
EPI_ISL_18132885	Minor08
EPI_ISL_18132889	Minor08
EPI_ISL_18133338	Minor08
EPI_ISL_18133459	Minor08
W22_140	Minor08
EPI_ISL_18132424	Minor09
EPI_ISL_18133184	Minor09
EPI_ISL_18133188	Minor09
EPI_ISL_18133192	Minor09
EPI_ISL_18133196	Minor09
EPI_ISL_18132182	Minor11
EPI_ISL_18132197	Minor11
EPI_ISL_13285238	Minor12
EPI_ISL_18132833	Minor12
EPI_ISL_18132909	Minor13
EPI_ISL_11971490	Minor14
EPI_ISL_11971491	Minor14
EPI_ISL_11971502	Minor14
EPI_ISL_18132352	Minor14
EPI_ISL_16171505	Minor15
EPI_ISL_16297079	Minor17
EPI_ISL_16297080	Minor17
22_037529_001	Minor19
22_038557_003	Minor19
22_040465_003	Minor19
22_040757_001	Minor19
22_041130_004	Minor19
22_042171_001	Minor19
23_002116_001	Minor19
EPI_ISL_16271839	Minor19
EPI_ISL_17471583	Minor19
22_038652_001	Minor25
22_039953_001	Minor25
22_040571_002	Minor25
22_040760_001	Minor25
22_040766_001	Minor25
22_041366_001	Minor25
22_041409_002	Minor25
22_038267_001	Minor28
EPI_ISL_17964870	Minor33
23_013078_002	Minor34
EPI_ISL_16297131	Minor38
EPI_ISL_16297132	Minor38
